# Supplementary material for: Unveiling genetic basis of seedling emergence from deep soil depth under dry direct- seeded conditions in rice (Oryza sativa L.)
Source: Front Plant Sci. 2025 Jan 29;15:1512234. doi: 10.3389/fpls.2024.1512234 (PMC11814172; doi:10.3389/fpls.2024.1512234)
Supplement: Supplementary file 5 [file Table5.xlsx]

## Sheet: Table S5 July 2022
Table S5. Wtather data during phenotyping data collection.
Label	Power.Avg1	RH.Avg1	AirTemp.Avg1	Rad'n.Avg1	Speed.Avg1	Dir.Avg1	PAR QUANTUM.Avg1	Pressure.Avg1	Total Rad.Avg1	Diffused Rad.Avg1	SOIL MOISTURE.Avg1	SoilTemp.Avg1	Rain.Tot2	ET (P-M)#@1h/10m	ET (P-M).Tot3@1d	Sunshine.Tot5	RH.Max4	RH.Min4	AirTemp.Max4	AirTemp.Min4	Rain.Tot6	Pressure.Avg7	Total Rad.Avg7	Diffused Rad.Avg7	SOIL MOISTURE.Avg7	SoilTemp.Avg7
Units	V	%	deg C	W.m-2	m.s-1	deg	umol.m-2.s-1	hPa	umol.m-2.s-1	umol.m-2.s-1	%	deg C	mm	mm	mm	no sun~sun	%	%	deg C	deg C	mm	hPa	umol.m-2.s-1	umol.m-2.s-1	%	deg C
2022-07-01	10.86	99.52	28.04	0	0.22	194.64	0.4	991.24	0.6	0.4	20.92	27.9	0	0.003	2.84	3	100	80.3	31.5	25.3	9	991.02	369.6	311.8	21.275	30.41
2022-07-01 01:00:00	10.86	99.86	27.98	0	0.24	106.08	0.2	990.96	0.6	0.4	20.92	27.86	0	0.003
2022-07-01 02:00:00	10.86	100	27.82	0	0.42	80.04	0.2	990.8	0.6	0.4	20.9	27.84	0	0.003
2022-07-01 03:00:00	10.86	99.86	27.9	0.2	0.86	101.92	0.2	990.9	0.6	0.4	20.88	27.72	0	0.003
2022-07-01 04:00:00	10.86	100	27.72	0	0.38	73.84	0.2	990.9	0.6	0.4	20.88	27.64	0	0.003
2022-07-01 05:00:00	10.86	100	27.56	0.2	0.78	107.18	0.4	990.98	0.6	0.4	20.88	27.5	0.2	0.003
2022-07-01 06:00:00	10.86	100	27.48	22.2	0.84	122.36	46.8	991.2	40.2	39.6	20.92	27.56	0.2	0.019
2022-07-01 07:00:00	10.86	100	27.78	80.2	1.62	131.94	166	991.66	160	158.6	20.9	28.42	0	0.06
2022-07-01 08:00:00	10.86	99.38	28.38	223.6	1.62	155.7	527.2	991.78	457.6	439.6	20.9	31.08	0	0.163
2022-07-01 09:00:00	10.84	93.06	29.7	454.4	0.7	219.9	1082.6	991.98	971.4	768	20.88	35.84	0	0.344
2022-07-01 10:00:00	10.84	90.28	30.26	335.4	0.7	257.82	838.2	992.16	718	701	20.8	35.9	0	0.259
2022-07-01 11:00:00	10.84	88.34	30.56	405.4	0.96	261.64	1005	992.08	854.2	842.8	20.74	36.46	0	0.302
2022-07-01 12:00:00	10.84	88.84	31.12	760.8	1.42	281.98	1806.4	991.74	1583.2	1054.6	20.68	38.64	0	0.566
2022-07-01 13:00:00	10.84	81.02	32.7	936.8	1.38	299.02	2309.6	990.58	2054.8	1073.8	20.52	42.64	0	0.727
2022-07-01 14:00:00	10.84	77.56	33.44	682.2	1.44	145.72	1716.2	989.64	1475.4	1027.6	20.34	41.44	0	0.54
2022-07-01 15:00:00	10.84	74.8	33.74	490	1.42	334.32	1283.4	988.92	1052.4	806	20.22	41.56	0	0.332
2022-07-01 16:00:00	10.84	70.14	34.54	546.2	1.22	76.76	1383.6	988.24	1113.6	717	20.12	42.06	0	0.385
2022-07-01 17:00:00	10.84	75.14	34	233.8	0.86	226.34	602	987.46	479.4	416.8	20.02	38.56	0	0.163
2022-07-01 18:00:00	10.84	78.86	33.46	138	1.2	91.32	343	987.76	269	242.8	20	35.86	0	0.094
2022-07-01 19:00:00	10.84	83.82	32.44	27	1.22	155.36	63.6	988.1	48.4	47.6	19.98	32.66	0	0.015
2022-07-01 20:00:00	10.84	86.82	31.4	0	0.54	136.1	0.2	989.38	0.6	0.4	19.98	30.94	0	-0.008
2022-07-01 21:00:00	10.86	91.7	30.82	0	0.14	164.44	0.2	990.4	0.6	0.4	19.98	30.3	0	-0.014
2022-07-01 22:00:00	10.86	95.28	30.36	0	0.2	274.44	0.2	990.48	0.6	0.4	20	30.06	0	-0.014
2022-07-01 23:00:00	10.86	99.7	29.9	0.2	0.16	185.84	0.2	990.62	0.6	0.4	20	29.98	0	-0.014
2022-07-02	10.86	95.2	29.94	0	0.42	228.12	0.2	990.24	0.6	0.4	20	29.5	0	0.005	3.94	5	100	67.3	34.9	27.4	0.4	990.375	470.2	347.5	20.475	33.255
2022-07-02 01:00:00	10.86	99.7	29.26	0	0.14	127.1	0.2	990.06	0.6	0.4	20	29.32	0	0.002
2022-07-02 02:00:00	10.86	98.48	29.28	0	0.16	165.72	0.2	989.38	0.6	0.4	20	29.02	0	0.003
2022-07-02 03:00:00	10.86	99.18	28.94	0	0.34	175.74	0.4	988.82	0.6	0.4	20	28.68	0	0.003
2022-07-02 04:00:00	10.86	99.88	28.88	0	0.16	161.24	0.2	989.06	0.6	0.4	20	28.74	0	0.002
2022-07-02 05:00:00	10.86	100	28.76	0	0	140.36	0.2	989.16	0.6	0.4	20.02	28.96	0	0.002
2022-07-02 06:00:00	10.86	99.9	29.1	2.6	0.54	124.28	7.8	989.28	4.8	4.4	20	29.02	0	0.004
2022-07-02 07:00:00	10.86	99.94	29.08	25.2	1.26	161.54	65.8	989.6	53	51.8	20	29.38	0	0.021
2022-07-02 08:00:00	10.86	96.78	28.06	44	2.34	158.24	113.6	989.9	95.6	94.6	20.02	28.4	0	0.04
2022-07-02 09:00:00	10.86	100	27.26	41.8	2.34	154.16	109.4	990.5	95	94	20.04	27.84	0	0.031
2022-07-02 10:00:00	10.86	99.98	27.16	61.8	1.24	213.02	162	990.64	140.2	138.8	20.1	27.98	0.4	0.047
2022-07-02 11:00:00	10.86	100	27.02	89.6	1.54	287.36	227.6	991.22	203.4	201.6	20.34	28.12	0.8	0.066
2022-07-02 12:00:00	10.86	100	27.14	115.8	1.24	210.7	282.4	990.68	255	252.6	20.52	28.42	0.8	0.079
2022-07-02 13:00:00	10.86	99.54	27.62	288.4	1.06	54.26	671.2	989.42	598.2	591.6	20.54	30.22	0	0.181
2022-07-02 14:00:00	10.84	93.38	28.66	431.8	1.08	102.58	1050.4	989.24	885.8	855.8	20.48	33.46	0	0.297
2022-07-02 15:00:00	10.84	87.32	30	684.2	1.46	173.02	1698.8	988.48	1400.6	917	20.4	38.42	0	0.409
2022-07-02 16:00:00	10.84	84.92	31.2	513	1.2	86.7	1305.6	988.02	1035	657.8	20.26	39.22	0	0.327
2022-07-02 17:00:00	10.84	81.86	31.76	363.8	1.16	86.86	929.8	987.56	712	461.4	20.18	38.82	0	0.234
2022-07-02 18:00:00	10.84	83.86	31.5	137	1.1	41.74	324	987.42	271	221.4	20.1	35.1	0	0.081
2022-07-02 19:00:00	10.84	88.16	30.6	22.2	0.78	17.42	53.4	988.1	40.4	39.8	20.06	30.96	0	0.002
2022-07-02 20:00:00	10.86	92.26	30	0	0.44	88.6	0.2	989.2	0.6	0.4	20.04	29.66	0	-0.012
2022-07-02 21:00:00	10.86	94.3	29.62	0	0.44	230.98	0.2	990.18	0.6	0.4	20.04	29.18	0	-0.013
2022-07-02 22:00:00	10.86	95.16	29.34	0	0.68	45.02	0.2	990.98	0.6	0.4	20.04	29.28	0	-0.012
2022-07-02 23:00:00	10.86	97.02	28.44	0	0.48	165.02	0.4	990.68	0.6	0.4	20.04	28.32	0	-0.015
2022-07-03	10.86	99.26	28.1	0	0.2	230.14	0.2	990.42	0.6	0.4	20.04	28.06	0	0.003	1.78	3	100	81	32.1	27	2	989.5	241.5	191.1	20.135	30.605
2022-07-03 01:00:00	10.86	99.72	27.86	0	0.26	105.46	0.2	990.34	0.6	0.4	20.02	27.9	0	0.003
2022-07-03 02:00:00	10.86	96.86	27.94	0	0.52	87.72	0.2	989.52	0.6	0.4	20.02	27.84	0	0.004
2022-07-03 03:00:00	10.86	97.7	28.02	0	0.5	91.14	0.4	989.12	0.6	0.4	20.02	27.74	0	0.004
2022-07-03 04:00:00	10.86	92.68	28	0	1.3	105.56	0.2	988.98	0.6	0.4	20.02	27.84	0	0.013
2022-07-03 05:00:00	10.86	97.34	27.92	0	0.54	65.7	0.2	989.08	0.6	0.4	20.02	27.76	0	0.004
2022-07-03 06:00:00	10.86	98.36	27.82	17.4	0.26	117.5	38.4	989.5	29.4	29	20.02	27.92	0	0.017
2022-07-03 07:00:00	10.86	91.92	28.36	83	0.34	108.96	197.8	990.1	162	160.6	20.02	29.14	0	0.07
2022-07-03 08:00:00	10.86	86.18	28.74	179.8	1.4	157.9	433.8	990.62	362	352.2	20.02	31.06	0	0.155
2022-07-03 09:00:00	10.86	93.1	29.44	245.6	1.24	135.62	610.6	990.82	512.8	500.2	20	33.48	0	0.192
2022-07-03 10:00:00	10.84	89.56	30.76	331.4	0.64	179.6	794.8	991.02	674	621.2	19.98	35.38	0	0.259
2022-07-03 11:00:00	10.84	88.2	31.16	339.4	0.98	144.58	815.6	991.08	669.8	636.4	19.92	35.72	0	0.26
2022-07-03 12:00:00	10.84	85.46	31.7	544.4	1.7	113.32	1315.4	990.78	1021.4	873.8	19.86	37.6	0	0.409
2022-07-03 13:00:00	10.84	81.56	32.66	885.4	1.8	117.96	2158.2	989.88	1895.6	1130.4	19.74	40.52	0	0.682
2022-07-03 14:00:00	10.84	76.14	32.56	322.8	2.46	115.96	806	988.98	670.2	515.4	19.56	37.4	0	0.268
2022-07-03 15:00:00	10.84	83.6	31.38	303	1.5	135.3	761.8	988.1	610	543.4	19.52	34.62	0	0.186
2022-07-03 16:00:00	10.84	82.5	32.1	229.2	2.14	109.58	572	987.94	456.4	370.8	19.46	36.16	0	0.141
2022-07-03 17:00:00	10.84	93.64	29.16	44	1.76	43.9	116	987.28	93.6	92.6	19.42	30.52	0	0.01
2022-07-03 18:00:00	10.86	92.28	29.58	56.2	0.48	99.4	146.6	987.26	116.6	115	19.42	30.56	0	0.015
2022-07-03 19:00:00	10.86	90.72	30.18	19	0.44	126.72	46.6	987.6	36.2	35.2	19.42	30.08	0	-0.004
2022-07-03 20:00:00	10.86	94.34	29.7	0	0.66	129.88	0.4	988.68	0.6	0.4	19.42	29.16	0	-0.011
2022-07-03 21:00:00	10.86	98.88	29.38	0	0.5	99.86	0.2	989.26	0.6	0.4	19.44	29.06	0	-0.014
2022-07-03 22:00:00	10.86	92.4	29.26	0	0.68	69	0.2	990.44	0.6	0.4	19.44	28.84	0	-0.011
2022-07-03 23:00:00	10.86	98.86	29.28	0	0.9	125.04	0.4	990.64	0.6	0.4	19.44	28.64	0	-0.012
2022-07-04	10.86	76.2	29.02	0	0.28	174.4	0.2	990.54	0.6	0.4	19.44	28.52	0	0.011	2.65	2	100	0.2	33.6	27.5	0	989.48	304.85	249.2	19.735	31.395
2022-07-04 01:00:00	10.86	88.92	29.1	0	1.16	106.96	0.2	989.84	0.6	0.4	19.44	28.22	0	0.016
2022-07-04 02:00:00	10.86	85.5	28.94	0	0.92	108.64	0.4	989.52	0.6	0.4	19.44	27.98	0	0.017
2022-07-04 03:00:00	10.86	87.12	28.72	0.2	1.3	94.4	0.2	989.22	0.6	0.4	19.44	27.84	0	0.021
2022-07-04 04:00:00	10.86	89.38	28.48	0	1.36	108.76	0.4	989.08	0.6	0.4	19.44	27.7	0	0.018
2022-07-04 05:00:00	10.86	87.94	28.38	0.2	1.8	110.14	0.4	989.06	0.6	0.4	19.44	27.62	0	0.025
2022-07-04 06:00:00	10.86	88.52	28.34	27.6	1.34	101.04	71	989.48	56.4	54.6	19.44	27.96	0	0.039
2022-07-04 07:00:00	10.86	96.76	28.72	109.8	1.52	115.28	282.8	990	235.8	226.6	19.46	29.74	0	0.088
2022-07-04 08:00:00	10.86	94.48	29.66	359.2	2.48	114.56	832	989.86	732.2	523.6	19.46	34.48	0	0.263
2022-07-04 09:00:00	10.84	88.28	30.54	542	2.66	138.34	1282.6	989.9	1133.2	721.8	19.42	37.24	0	0.402
2022-07-04 10:00:00	10.84	89.78	31.26	420.8	2.82	137.94	1038	990.04	890.4	668	19.32	37.32	0	0.318
2022-07-04 11:00:00	10.84	82.52	32.46	886.2	3.02	133.78	2126.6	989.98	1887	839.4	19.2	40.08	0	0.666
2022-07-04 12:00:00	10.84	74.72	33.22	569.2	3.02	113.7	1425.2	989.5	1219.4	786.6	19	40.3	0	0.464
2022-07-04 13:00:00	10.84	75.92	33.8	675.8	3.12	109.74	1676.8	988.82	1439	903.2	18.82	40.32	0	0.546
2022-07-04 14:00:00	10.84	75.18	34.04	527	3.44	109.18	1384.2	988.06	1164.8	899.4	18.62	40.5	0	0.444
2022-07-04 15:00:00	10.84	73.12	34.38	389.6	3.1	147.04	1058.4	987.12	870	742.4	18.44	39.92	0	0.254
2022-07-04 16:00:00	10.84	69.86	33.74	133.8	2.7	129.18	342.4	986.34	281.2	277.6	18.36	35.66	0.2	0.114
2022-07-04 17:00:00	10.84	76.32	33.9	299.8	2.18	108.9	637	985.54	568	400.6	18.46	35.9	0	0.201
2022-07-04 18:00:00	10.84	71.58	34.54	150.8	2.62	123.9	381.4	985.76	292.2	231.2	18.4	36.02	0	0.125
2022-07-04 19:00:00	10.84	65.78	34.14	27.4	2.8	122.36	65.6	986.36	49.6	47.6	18.34	33.06	0	0.07
2022-07-04 20:00:00	10.84	72.28	33.46	0	2.56	126.56	0.2	986.98	0.6	0.4	18.34	31.38	0	0.044
2022-07-04 21:00:00	10.84	79.16	32.96	0	2.46	130.68	0	987.96	0.6	0.4	18.34	30.88	0	0.029
2022-07-04 22:00:00	10.86	81.78	32.38	0	2.38	131.32	0.2	988.72	0.6	0.4	18.34	30.46	0	#+INF
2022-07-04 23:00:00	10.86	84.1	31.92	0	2.44	136.64	0.2	989.38	0.6	0.4	18.34	30.1	0	#+INF
2022-07-05	10.86	85.3	31.56	0	2.48	132.24	0.2	989.62	0.6	0.4	18.36	29.86	0	0.04	#+INF	5	99.3	50.8	34.7	28.2	0.2	988.59	451.1	305.3	18.9	33.355
2022-07-05 01:00:00	10.86	82.1	31.34	0	2.56	108.8	0.2	989.46	0.6	0.4	18.34	29.68	0	0.05
2022-07-05 02:00:00	10.86	87.94	30.82	0	2.44	115.9	0.2	989.26	0.6	0.4	18.34	29.32	0	0.033
2022-07-05 03:00:00	10.86	91.22	30.28	0	2.18	138.24	0.2	988.56	0.6	0.4	18.34	28.88	0	0.022
2022-07-05 04:00:00	10.86	93.96	29.78	0	1.98	148.34	0.2	987.98	0.6	0.4	18.34	28.5	0	0.015
2022-07-05 05:00:00	10.86	95.34	29.42	0.2	1.62	124.38	0.6	988.2	0.6	0.4	18.36	28.24	0	0.01
2022-07-05 06:00:00	10.86	96.16	29.34	26	1.9	113.88	67.2	989	53.2	52	18.36	28.52	0	0.028
2022-07-05 07:00:00	10.86	94.8	29.84	153.2	2.2	142.36	370.8	989.66	321.6	273.6	18.38	31.56	0	0.124
2022-07-05 08:00:00	10.84	92.04	30.62	346.4	2.68	152.74	836	989.94	739	516.6	18.38	36.26	0	0.264
2022-07-05 09:00:00	10.84	87.52	31.68	531.6	2.44	153.54	1302.6	989.88	1173	710.6	18.32	39.74	0	0.407
2022-07-05 10:00:00	10.84	81.8	32.86	692	2.16	150.88	1703.4	989.86	1534.2	887.6	18.18	41.84	0	0.536
2022-07-05 11:00:00	10.84	73	33.82	538.2	2	172.76	1436	989.62	1244.8	922.8	18.1	42.42	0	0.44
2022-07-05 12:00:00	10.84	72.4	34.54	941.6	2.66	147.9	2249.4	989.3	1937.4	1046.4	17.7	41.86	0	0.76
2022-07-05 13:00:00	10.84	70.28	35.16	662.6	2.96	135.12	1649.4	989.08	1420	877.4	17.6	40.22	0	0.564
2022-07-05 14:00:00	10.84	62.36	35.78	848.8	3.46	153.72	2073.6	988.4	1773	928.4	17.58	42.74	0	0.737
2022-07-05 15:00:00	10.84	60.56	36.36	623.4	3	162.46	1553.6	987.76	1292.4	790.2	17.5	43.06	0	0.428
2022-07-05 16:00:00	10.84	62.06	36.26	353.4	2.26	151.14	909.6	987.26	727	498.8	17.4	41.88	0	0.269
2022-07-05 17:00:00	10.84	62.5	36.14	230.4	2.58	126.4	610.8	986.62	469.8	364.6	17.32	40.68	0	0.194
2022-07-05 18:00:00	10.84	64.26	35.88	126.4	2.36	120.2	338	986.84	256.6	204.8	17.26	37.78	0	0.125
2022-07-05 19:00:00	10.84	64.6	35.5	24.4	2.3	105.06	66.4	987	49.2	46.6	17.2	34.72	0	0.065
2022-07-05 20:00:00	10.84	67.54	34.66	0	2.4	113.58	0.2	987.76	0.8	0.4	17.18	32.5	0.2	0.052
2022-07-05 21:00:00	10.84	76.32	33.34	0	1.66	128.84	0.2	988.82	0.6	0.4	17.22	30.86	0	0.022
2022-07-05 22:00:00	10.84	75.84	33.32	0	1.98	110.28	0.2	989.7	0.6	0.4	17.22	31.28	0	0.028
2022-07-05 23:00:00	10.84	77.74	32.96	0	2.28	120.18	0	990	0.6	0.4	17.22	31.14	0	#+INF
2022-07-06	10.86	80.42	32.52	0	2.82	130.38	0.2	989.94	0.6	0.4	17.22	30.84	0	0.06	#+INF	8	96.6	53.9	36.7	29.3	0.2	988.745	541.55	338.5	17.795	35.19
2022-07-06 01:00:00	10.86	81.5	32.1	0	2.8	133.14	0.2	989.94	0.6	0.4	17.22	30.46	0	0.056
2022-07-06 02:00:00	10.86	83.66	31.68	0	2.86	141.52	0.2	990.34	0.6	0.4	17.2	30.14	0	0.051
2022-07-06 03:00:00	10.86	86.42	31.28	0	2.88	137.2	0.2	990.28	0.6	0.4	17.2	29.8	0	0.042
2022-07-06 04:00:00	10.86	88.62	30.86	0	2.48	133.08	0.4	990.52	0.6	0.4	17.2	29.48	0	0.031
2022-07-06 05:00:00	10.86	90.08	30.58	0	2.3	148.72	0.4	990.92	0.6	0.4	17.2	29.38	0	0.026
2022-07-06 06:00:00	10.86	90.9	30.28	27.6	1.82	146.42	74.4	991.1	60.6	56.4	17.22	29.36	0	0.04
2022-07-06 07:00:00	10.86	88.56	30.84	170	2.24	132.84	411	991.38	370.8	232.8	17.26	33.04	0	0.153
2022-07-06 08:00:00	10.84	84.16	31.7	370.4	2.86	136.56	896.4	991.72	797.2	355.2	17.3	37.2	0	0.307
2022-07-06 09:00:00	10.84	77.5	32.86	559.2	3.12	144.74	1372	992.18	1277.8	427	17.32	40.04	0	0.46
2022-07-06 10:00:00	10.84	73.24	33.62	744.4	3.58	131.14	1784	992.34	1677	404.8	17.26	41.28	0	0.602
2022-07-06 11:00:00	10.84	69.32	34.2	586.8	4.06	124.82	2086.6	992.22	1921.6	444.6	17.18	42.12	0	0.513
2022-07-06 12:00:00	10.84	65.68	34.76	718.8	4.38	128.24	1743	992.04	1519.8	603	17.08	42.34	0	0.629
2022-07-06 13:00:00	10.84	63.4	35.3	668.4	4.36	114.94	1638.2	991.64	1425.8	808.6	16.98	42.9	0	0.609
2022-07-06 14:00:00	10.84	63.64	35	478.8	4.36	128.5	1193.6	990.98	1002.6	780.2	16.84	40.46	0	0.469
2022-07-06 15:00:00	10.84	63.32	35.2	408	4.7	126.88	1052.4	990.02	867.8	698.6	16.76	40.3	0	0.284
2022-07-06 16:00:00	10.84	65	34.92	291.8	4.46	133.72	751.2	989.42	608	548	16.68	38.9	0	0.223
2022-07-06 17:00:00	10.84	63.8	34.62	199.8	4.46	130.14	518.2	989.48	412.4	393.6	16.6	37.1	0	0.18
2022-07-06 18:00:00	10.84	64.42	34.5	174	3.94	140.66	478.2	989.84	364.4	172.2	16.54	37.08	0	0.162
2022-07-06 19:00:00	10.84	65.4	34.24	36.2	2.94	132.84	105.6	990.66	75.8	62.2	16.48	33.86	0	0.077
2022-07-06 20:00:00	10.84	66.48	33.82	0	2.74	124.84	0.2	991.2	0.8	0.4	16.46	31.98	0	0.059
2022-07-06 21:00:00	10.84	68.58	32.98	0	3.92	141.64	0.2	992.44	0.6	0.4	16.44	31.72	0	0.071
2022-07-06 22:00:00	10.86	74.44	31.78	0	3.72	149.62	0.2	993.36	0.6	0.4	16.42	30.66	0	0.052
2022-07-06 23:00:00	10.86	77.04	31.1	0	3.24	131.24	0.2	994.24	0.6	0.4	16.4	29.9	0	0.039
2022-07-07	10.86	82.64	30.28	0	3.62	138.3	0.2	994.32	0.6	0.4	16.4	29.2	0	0.063	5.2	8	91.8	62.7	35.5	30	0	991.36	516.2	249.65	16.905	34.95
2022-07-07 01:00:00	10.86	86.94	29.64	0	3.64	120.42	0.2	994.1	0.6	0.4	16.4	28.7	0	0.048
2022-07-07 02:00:00	10.86	89.24	29.1	0	3.98	139.48	0.2	993.58	0.6	0.4	16.4	28.3	0	0.042
2022-07-07 03:00:00	10.86	90.78	28.82	0	3.4	146.9	0.2	993.32	0.6	0.4	16.38	27.96	0	0.032
2022-07-07 04:00:00	10.86	91.84	28.62	0.2	2.98	131.38	0.2	993.74	0.6	0.4	16.38	27.76	0	0.026
2022-07-07 05:00:00	10.86	93	28.48	0.2	3.22	139.5	0.4	993.92	0.6	0.4	16.38	27.62	0	0.024
2022-07-07 06:00:00	10.86	93.84	28.38	27.6	3.14	146.32	81.6	994.14	69.2	56	16.4	28	0	0.039
2022-07-07 07:00:00	10.86	92.94	28.84	183.6	3.98	145.24	459.6	994.5	419.8	209.8	16.44	31.48	0	0.147
2022-07-07 08:00:00	10.86	88.38	29.62	394.8	4.22	146.8	977.6	994.84	871.4	372.6	16.48	35.4	0	0.296
2022-07-07 09:00:00	10.84	86.02	30.66	518.2	3.9	139.3	1305	995.14	1184.2	492.4	16.5	38.1	0	0.388
2022-07-07 10:00:00	10.84	83.1	31.52	439.4	3.26	137.88	1083.8	995.02	1039	624.8	16.48	39.34	0	0.35
2022-07-07 11:00:00	10.84	78.24	32.62	763.2	3.16	137.96	1891	994.5	1698.8	579.2	16.48	41.74	0	0.589
2022-07-07 12:00:00	10.84	66.16	33.54	705	2.94	113.98	1746.4	993.88	1541.4	678.6	16.46	43.36	0	0.585
2022-07-07 13:00:00	10.84	68.44	34.38	783	3.1	127.58	1918.4	993.44	1712.4	649.8	16.42	43.66	0	0.65
2022-07-07 14:00:00	10.84	65.34	35.02	764.6	3.34	132.9	1933	992.62	1630.4	635.8	16.38	45.42	0	0.655
2022-07-07 15:00:00	10.84	64.54	35.28	789.2	3.24	135.38	1965.8	991.68	1644	676	16.3	44.54	0	0.494
2022-07-07 16:00:00	10.84	60.52	35.32	429	3.18	115.42	1129.2	990.68	896.4	442.8	16.2	43.4	0	0.306
2022-07-07 17:00:00	10.84	61.54	35.46	336	3.38	121.36	860	990.06	658	386	16.12	41.88	0	0.255
2022-07-07 18:00:00	10.84	60.44	35.38	128.4	3.06	127.36	338	990.16	274.2	210.4	16.02	38.82	0	0.14
2022-07-07 19:00:00	10.84	61.22	34.96	26.4	2.94	117.6	64.8	990.56	50	48.6	15.94	34.74	0	0.084
2022-07-07 20:00:00	10.84	64.06	34.32	0.2	2.74	123.9	0.2	990.84	0.8	0.4	15.9	32.92	0	0.065
2022-07-07 21:00:00	10.84	67.24	33.74	0	2.8	132.92	0	991.24	0.6	0.4	15.88	32.12	0	0.058
2022-07-07 22:00:00	10.84	70.46	33.2	0	2.76	135.66	0.2	991.92	0.6	0.4	15.86	31.58	0	#+INF
2022-07-07 23:00:00	10.86	74.26	32.58	0	2.16	126.54	0.2	992.32	0.6	0.4	15.84	30.98	0	0.032
2022-07-08	10.86	75.58	32.18	0	2.28	140.68	0.2	992.58	0.6	0.4	15.84	30.54	0	0.062	#+INF	11	94.2	34.7	35.7	28.3	0	992.865	570.65	252.8	16.245	35.35
2022-07-08 01:00:00	10.86	78.56	31.64	0.2	1.9	131.76	0.2	992.52	0.6	0.4	15.84	29.98	0	0.047
2022-07-08 02:00:00	10.86	80.02	31.28	0.2	2.1	130.04	0.2	992.18	0.6	0.4	15.84	29.7	0	0.047
2022-07-08 03:00:00	10.86	81.08	30.82	0	2.64	140.1	0.2	991.84	0.6	0.4	15.82	29.34	0	0.054
2022-07-08 04:00:00	10.86	85.94	30.3	0	2.28	136.66	0.2	991.48	0.6	0.4	15.82	28.92	0	0.036
2022-07-08 05:00:00	10.86	88.2	29.86	0	1.78	146.46	0.2	991.4	0.6	0.4	15.82	28.48	0	0.025
2022-07-08 06:00:00	10.86	89.2	29.66	23.6	1.96	149.16	68	991.64	55	50.4	15.82	28.76	0	0.041
2022-07-08 07:00:00	10.86	86.2	30.42	169	2.08	147.36	415.6	992.08	367.8	235.2	15.86	32.88	0	0.156
2022-07-08 08:00:00	10.84	79.94	31.72	374.8	2.04	143.2	920.6	992.28	819.4	373.8	15.94	38.6	0	0.316
2022-07-08 09:00:00	10.84	74.88	32.94	559.2	2.06	168.56	1396.6	992.4	1274.6	476.4	15.98	42.12	0	0.461
2022-07-08 10:00:00	10.84	62.46	33.92	718	2.28	131.66	1778.4	992.6	1588.2	571.6	16.02	44.1	0	0.597
2022-07-08 11:00:00	10.84	66.26	34.78	854.6	2.72	142.48	2072.6	992.26	1885.2	582.8	16.02	45.08	0	0.71
2022-07-08 12:00:00	10.84	62.62	35.46	822.6	2.94	137.96	1971.2	991.64	1756.6	591.8	15.98	45.38	0	0.705
2022-07-08 13:00:00	10.84	57.5	36.2	705.4	2.6	159.58	1729.2	990.92	1570.6	585	15.96	46.14	0	0.628
2022-07-08 14:00:00	10.84	56.72	36.56	809.2	3.36	144.46	1978.6	990.3	1744.4	577.8	15.88	45.5	0	0.731
2022-07-08 15:00:00	10.84	54.3	37	649.4	3.46	137.66	1661.8	989.08	1404.2	412.4	15.8	46.96	0	0.456
2022-07-08 16:00:00	10.84	54.44	37.12	511	3.34	133.44	1322.6	987.88	1069.8	369.8	15.72	46.38	0	0.381
2022-07-08 17:00:00	10.84	54.2	36.86	351	3.12	129.18	909	987.32	697.2	295.4	15.6	43.74	0	0.288
2022-07-08 18:00:00	10.84	54.94	36.7	153.2	2.94	125.64	406.6	987.14	313.8	186.4	15.5	40.34	0	0.169
2022-07-08 19:00:00	10.84	56.46	36	25.2	2.84	128.66	72.4	987.66	53.4	47.2	15.42	36	0	0.095
2022-07-08 20:00:00	10.84	60.26	35.26	0	2.58	126.68	0.2	988.4	0.8	0.4	15.38	33.94	0	0.07
2022-07-08 21:00:00	10.84	61.78	34.74	0	2.46	144	0.2	989.36	0.6	0.4	15.34	33.04	0	0.063
2022-07-08 22:00:00	10.84	65.26	34.12	0	2.6	136.82	0	989.88	0.8	0.4	15.32	32.4	0	0.058
2022-07-08 23:00:00	10.84	67.92	33.42	0	3.02	132.14	0.2	989.96	0.6	0.4	15.32	31.84	0	#+INF
2022-07-09	10.84	69.7	32.76	0	2.84	133.54	0.2	989.76	0.6	0.4	15.3	31.34	0	0.094	#+INF	10	89.8	43.9	37.3	29.6	0	990.5	608.65	223.35	15.72	37.125
2022-07-09 01:00:00	10.86	71.7	32.34	0	2.92	140.76	0	989.5	0.6	0.4	15.3	30.94	0	0.089
2022-07-09 02:00:00	10.86	70.76	31.82	0	2.98	136.54	0.2	989.04	0.6	0.4	15.28	30.54	0	0.093
2022-07-09 03:00:00	10.86	75.08	31.46	0	2.5	140.92	0.2	988.68	0.6	0.4	15.28	30.32	0	0.068
2022-07-09 04:00:00	10.86	77.78	31.16	0	2.18	131.46	0.2	988.68	0.6	0.4	15.28	29.84	0	0.054
2022-07-09 05:00:00	10.86	80.32	30.7	0	2.36	145.38	0.2	989.2	0.6	0.4	15.26	29.38	0	0.051
2022-07-09 06:00:00	10.86	83.64	30.32	25.2	2.6	142.34	62.2	989.58	48.6	47.4	15.26	29.5	0	0.064
2022-07-09 07:00:00	10.86	85.44	30.26	141.2	3.22	145.5	350.8	989.96	305.6	236.2	15.3	31.66	0	0.146
2022-07-09 08:00:00	10.84	82.28	31.12	325.8	3.1	162.52	799.2	990.36	696.4	445.2	15.36	36.52	0	0.281
2022-07-09 09:00:00	10.84	78.32	32.02	562.8	3.32	150.26	1382.2	990.78	1247.8	596	15.4	39.22	0	0.454
2022-07-09 10:00:00	10.84	70.3	33.52	729.2	3.18	155.06	1803.6	991.16	1618	650.8	15.46	43.64	0	0.596
2022-07-09 11:00:00	10.84	64.4	34.24	698.6	3.54	137.54	1713.4	990.98	1574	619.4	15.46	44.18	0	0.601
2022-07-09 12:00:00	10.84	61.52	34.86	770.6	3.88	150.7	1851.2	990.38	1644	579.6	15.46	44.9	0	0.675
2022-07-09 13:00:00	10.84	60.18	35.38	813.2	3.88	124.8	1949	989.68	1766.8	570.2	15.42	45.1	0	0.717
2022-07-09 14:00:00	10.84	59.08	35.78	899.8	4.3	129.28	2197.4	988.52	1939.6	505.4	15.36	45.76	0	0.796
2022-07-09 15:00:00	10.84	56.62	36.08	708.6	4.58	137.04	1777	987.76	1500.4	475.6	15.3	45.62	0	0.456
2022-07-09 16:00:00	10.84	54.16	36.3	551.2	4.26	131.7	1411.6	986.84	1115.6	358.4	15.2	45.58	0	0.39
2022-07-09 17:00:00	10.84	53.46	36.4	356.8	4.14	127.62	920	986.14	701.8	274.2	15.1	44.1	0	0.295
2022-07-09 18:00:00	10.84	52.76	36.04	155.6	4.14	142.62	418.8	986.1	321.2	172.8	15	40.1	0	0.191
2022-07-09 19:00:00	10.84	54.2	35.38	14.2	3.38	136.2	47.2	986.38	35.4	32	14.9	35.2	0	0.107
2022-07-09 20:00:00	10.84	57.46	34.72	0	2.66	129	0.2	987.16	0.8	0.4	14.86	33.44	0	0.075
2022-07-09 21:00:00	10.84	59.68	34.2	0	2.68	132.7	0	988.32	0.8	0.4	14.82	32.72	0	#+INF
2022-07-09 22:00:00	10.84	62.86	33.58	0	2.46	140.68	0	989.3	0.6	0.4	14.78	32.04	0	0.058
2022-07-09 23:00:00	10.84	66.46	32.86	0	2.3	107	0.2	989.8	0.6	0.4	14.78	31.5	0	0.047
2022-07-10	10.86	71.96	32.02	0	2.4	111.1	0.2	989.8	0.6	0.4	14.76	30.9	0	0.075	#+INF	11	86.2	51.2	36.5	30.1	0	988.92	605.1	231.95	15.18	36.78
2022-07-10 01:00:00	10.86	78	31.44	0.2	2.96	117.48	0.2	989.44	0.6	0.4	14.74	30.5	0	0.069
2022-07-10 02:00:00	10.86	80.3	31.14	0	3.1	114.14	0.2	989.28	0.6	0.4	14.72	30.18	0	0.064
2022-07-10 03:00:00	10.86	80.48	30.84	0	2.74	116.22	0.2	989.14	0.6	0.4	14.7	29.76	0	0.057
2022-07-10 04:00:00	10.86	81.64	30.44	0	2.5	135.42	0.2	989.22	0.6	0.4	14.7	29.3	0	0.05
2022-07-10 05:00:00	10.86	83.9	30.04	0	2.78	120.32	0.2	989.46	0.6	0.4	14.7	28.92	0	0.048
2022-07-10 06:00:00	10.86	83.4	29.76	24.2	2.9	126.56	76	989.6	64.4	48.8	14.7	29.14	0	0.067
2022-07-10 07:00:00	10.86	81.08	30.14	178	2.72	138.86	448.4	989.82	404.4	175.4	14.74	32.92	0	0.18
2022-07-10 08:00:00	10.84	77.46	31	387	2.96	145.82	946	989.88	849	270.8	14.8	37.84	0	0.334
2022-07-10 09:00:00	10.84	72.52	32.02	580.8	3.24	155.18	1423.6	990.02	1310.4	350.8	14.86	40.62	0	0.482
2022-07-10 10:00:00	10.84	66.86	33.02	762	3.48	118.4	1848.8	990.3	1675.2	377	14.9	42.9	0	0.624
2022-07-10 11:00:00	10.84	61.42	33.82	807	3.94	131.7	1928.6	990.46	1755.4	460.6	14.9	42.98	0	0.688
2022-07-10 12:00:00	10.84	56.52	34.76	778	4.14	135.86	1839.4	990.1	1645.8	450.2	14.9	44.12	0	0.7
2022-07-10 13:00:00	10.84	56.32	35.3	1077.8	3.82	138.66	2498.8	989.52	2283.2	640	14.88	45.36	0	0.92
2022-07-10 14:00:00	10.84	55.16	35.86	586.8	3.74	129.42	1437.4	988.88	1255	594.4	14.82	45.06	0	0.57
2022-07-10 15:00:00	10.84	53.34	36.12	657.6	3.3	124.98	1392.2	987.9	1326.8	579	14.74	44.5	0	0.453
2022-07-10 16:00:00	10.84	52.5	36.2	342.4	3.14	129.36	888.4	987.08	717.4	467.6	14.64	43.04	0	0.28
2022-07-10 17:00:00	10.84	51.12	36.3	305.8	3.5	133.56	768.2	986.84	606.2	320.2	14.56	42.3	0	0.267
2022-07-10 18:00:00	10.84	50.64	36.4	156.4	3.34	144.14	378.6	986.94	317.2	196.8	14.5	40.64	0	0.185
2022-07-10 19:00:00	10.84	50.8	35.92	26.2	3.28	137.62	76.6	987.6	56.4	48	14.4	36.04	0	0.118
2022-07-10 20:00:00	10.84	53.46	35.2	0	2.58	117.98	0.2	988.04	0.8	0.4	14.36	33.88	0	0.082
2022-07-10 21:00:00	10.84	56.1	34.62	0	2.28	115.34	0	988.86	0.8	0.4	14.34	33.14	0	0.067
2022-07-10 22:00:00	10.84	59.54	34.04	0	2.18	115	0	989.84	0.8	0.4	14.32	32.74	0	0.057
2022-07-10 23:00:00	10.84	83.4	30.82	0	2.04	114.26	0.2	990.54	0.6	0.4	14.86	29.52	3.2	0.014
2022-07-11	10.86	75.5	32.1	0	2.82	124.56	0.2	990.4	0.6	0.4	15.1	29.88	0	0.075	6.45	13	95.9	49.7	36.6	29.3	3.2	989.135	594.75	207.65	14.705	36.47
2022-07-11 01:00:00	10.86	77.28	31.86	0	3.02	125.1	0.2	990.12	0.6	0.4	15.06	29.84	0	0.073
2022-07-11 02:00:00	10.86	79.44	31.4	0	2.96	124.3	0.2	989.68	0.6	0.4	15	29.7	0	0.065
2022-07-11 03:00:00	10.86	80.16	31	0	2.76	125.84	0.4	989.5	0.6	0.4	14.96	29.4	0	0.059
2022-07-11 04:00:00	10.86	76.98	30.54	0	2.32	130.4	0.2	989.64	0.6	0.4	14.94	28.94	0	0.058
2022-07-11 05:00:00	10.86	81.9	30.18	0	2.24	123.76	0.2	989.82	0.6	0.4	14.9	28.62	0	0.045
2022-07-11 06:00:00	10.86	84.02	29.72	20.4	2.1	138.14	64.6	990.04	54	44	14.9	28.66	0	0.052
2022-07-11 07:00:00	10.86	82.12	30.2	180.2	2.66	147.28	450.2	990.54	421.4	170	14.9	32.58	0	0.178
2022-07-11 08:00:00	10.84	79.22	30.86	394	2.98	142.66	960.8	990.94	879	248.2	14.94	36.86	0	0.333
2022-07-11 09:00:00	10.84	75.7	32	591.4	3.06	140.36	1457	991.12	1356.4	345	14.94	39.52	0	0.479
2022-07-11 10:00:00	10.84	72.62	32.56	804.6	3.38	144.36	1813.8	990.92	1765	522.4	14.94	40.08	0	0.633
2022-07-11 11:00:00	10.84	68.96	33.28	673.6	3.62	121.12	1627.6	990.78	1415.8	736	14.96	41.98	0	0.56
2022-07-11 12:00:00	10.84	67.02	34	538.2	3.66	118.94	1311.4	990.36	1119.4	611.2	14.94	42.02	0	0.477
2022-07-11 13:00:00	10.84	62.82	35.12	737.8	3.84	126.4	1781.2	989.82	1631.4	610.4	14.96	44.26	0	0.65
2022-07-11 14:00:00	10.84	58.88	35.6	721	4.24	125.3	1722.2	989.26	1465	644.8	14.94	43.7	0	0.664
2022-07-11 15:00:00	10.84	61.62	35.02	312.8	4.02	128.3	813.6	988.7	666.8	621	14.8	40.82	0	0.241
2022-07-11 16:00:00	10.84	60.8	35.26	355.2	3.94	137.58	901	987.88	730.6	520.4	14.72	41.12	0	0.266
2022-07-11 17:00:00	10.84	57.32	35.5	281.4	4.1	137.88	731.4	987.4	579	346	14.66	42.28	0	0.24
2022-07-11 18:00:00	10.84	60.2	34.86	125	3.12	154.32	329.2	987.52	254.8	200.8	14.56	37.44	0	0.137
2022-07-11 19:00:00	10.84	61.38	34.42	20.2	2.5	141.4	62.8	987.94	46.8	43.2	14.48	34.54	0	0.07
2022-07-11 20:00:00	10.84	63.4	34.02	0	1.84	137.48	0.2	988.92	0.6	0.4	14.42	32.84	0	0.043
2022-07-11 21:00:00	10.84	62.96	34.2	0	1.86	126.48	0	989.76	0.8	0.4	14.4	32.96	0	0.044
2022-07-11 22:00:00	10.84	64.84	33.84	0	2.12	120.34	0	990.58	0.6	0.4	14.38	32.34	0	0.047
2022-07-11 23:00:00	10.84	67.48	33.32	0	2.54	140.16	0.2	991.04	0.6	0.4	14.38	31.74	0	0.051
2022-07-12	10.86	69.34	32.68	0	2.32	121.88	0.2	990.84	0.6	0.4	14.36	31.12	0	0.08	5.54	8	85	55.9	35.9	29.6	0	989.715	516.35	236.15	14.77	35.555
2022-07-12 01:00:00	10.86	71.5	32.18	0	2.36	126.38	0	990.56	0.6	0.4	14.36	30.94	0	0.075
2022-07-12 02:00:00	10.86	75.16	31.48	0	3.32	130.1	0.2	990.02	0.6	0.4	14.34	30.6	0	0.086
2022-07-12 03:00:00	10.86	77.78	30.9	0	2.94	132.32	0.2	989.66	0.6	0.4	14.34	30.12	0	0.069
2022-07-12 04:00:00	10.86	84.22	30.1	0	2.8	135.28	0.2	989.72	0.6	0.4	14.32	29.46	0	0.047
2022-07-12 05:00:00	10.86	86.08	29.74	0.2	3.04	137.36	0.4	989.78	0.6	0.4	14.32	29.1	0	0.044
2022-07-12 06:00:00	10.86	89.14	29.34	19.6	3.32	136.32	59	990.14	47.8	43.4	14.3	29	0	0.05
2022-07-12 07:00:00	10.86	89.76	29.38	134.4	3.06	133.4	350.4	990.6	313.2	169.2	14.34	31.38	0	0.125
2022-07-12 08:00:00	10.84	84.58	30.54	394.2	3.56	141.4	956.4	990.82	866.4	315.6	14.4	37.04	0	0.316
2022-07-12 09:00:00	10.84	77.36	31.72	637.4	3.76	137.46	1549	991.18	1436	394.4	14.48	39.88	0	0.503
2022-07-12 10:00:00	10.84	71.02	32.38	624.4	3.86	124.6	1516.2	991.36	1358.4	579.6	14.5	40.14	0	0.516
2022-07-12 11:00:00	10.84	69.32	33.06	659.2	3.58	125.1	1565.2	990.98	1377	637.2	14.5	41.16	0	0.546
2022-07-12 12:00:00	10.84	66.76	33.46	661.6	4.06	134.6	1567.6	990.48	1326.8	732.8	14.46	40.12	0	0.565
2022-07-12 13:00:00	10.84	63.32	34.4	516.8	4.12	116.2	906.6	989.46	1160.8	597.6	14.48	43.24	0	0.486
2022-07-12 14:00:00	10.84	60.24	34.78	550.6	4.22	132.04	1311.2	988.66	1104.8	727.6	14.44	42.56	0	0.527
2022-07-12 15:00:00	10.84	58.68	35.08	621	3.98	128.74	1478.2	987.82	1240	682.4	14.36	42.6	0	0.402
2022-07-12 16:00:00	10.84	57.4	35.44	464.6	3.8	133.08	1162	987.12	954.2	399.4	14.3	42.94	0	0.331
2022-07-12 17:00:00	10.84	56	35.7	358.6	3.84	129.62	911.2	986.52	716.8	273.6	14.26	43.78	0	0.282
2022-07-12 18:00:00	10.84	54.88	35.6	166.8	3.7	120.88	453.8	986.3	355.2	159.6	14.14	40.26	0	0.183
2022-07-12 19:00:00	10.84	56.72	35	26.4	3.36	127.8	82.6	986.46	60.4	51	14.04	35.36	0	0.103
2022-07-12 20:00:00	10.84	59.24	34.4	0	2.78	131.76	0	987.22	0.8	0.4	13.98	33.24	0	0.075
2022-07-12 21:00:00	10.84	61.12	34	0	2.76	124.12	0	988.22	0.6	0.4	13.96	32.7	0	#+INF
2022-07-12 22:00:00	10.84	63.1	33.74	0	2.88	96.3	0	988.82	0.6	0.4	13.94	32.9	0	0.067
2022-07-12 23:00:00	10.84	64.66	33.4	0	3.4	117.38	0	989.18	0.6	0.4	13.94	32.64	0	0.073
2022-07-13	10.84	68.02	32.84	0	3.48	123.66	0.2	989.12	0.6	0.4	13.92	32.1	0	0.117	#+INF	11	91.3	53.6	35.8	29.1	0	989.175	513.55	240.35	14.265	35.97
2022-07-13 01:00:00	10.84	71.88	32.32	0	3.62	113.52	0.2	988.7	0.6	0.4	13.92	31.68	0	0.106
2022-07-13 02:00:00	10.86	76.16	31.72	0	3.44	125.22	0	988.28	0.6	0.4	13.92	31.16	0	0.085
2022-07-13 03:00:00	10.86	77.36	31.24	0	3.46	134.66	0.2	987.98	0.6	0.4	13.9	30.34	0	0.081
2022-07-13 04:00:00	10.86	77	30.84	0	2.7	133.54	0.2	987.96	0.6	0.4	13.9	29.76	0	0.066
2022-07-13 05:00:00	10.86	78.42	30.36	0	2.82	130.28	0.4	988.12	0.6	0.4	13.9	29.28	0	0.064
2022-07-13 06:00:00	10.86	81.52	30	22.4	3.04	148.86	67.8	988.32	56.6	46.4	13.9	29.42	0	0.074
2022-07-13 07:00:00	10.86	81.64	30.26	170	2.92	142.24	431.2	988.74	394.2	184.6	13.92	33.1	0	0.175
2022-07-13 08:00:00	10.84	79.1	31.26	366	3.46	139.86	894	989.12	810.8	289	14	38.08	0	0.32
2022-07-13 09:00:00	10.84	76.04	31.94	571	4.14	150.12	1382.2	988.98	1255.6	479.2	14.06	39.82	0	0.469
2022-07-13 10:00:00	10.84	69.7	32.96	662	4.62	153.7	1571	988.6	1429.4	573.2	14.06	40.22	0	0.557
2022-07-13 11:00:00	10.84	64.72	33.8	642	4.26	136.78	1461.8	988.46	1387.8	604	14.08	41.76	0	0.565
2022-07-13 12:00:00	10.84	60.36	34.64	641.4	4.12	147.44	1537.2	988	1326.8	656.6	14.08	43.38	0	0.587
2022-07-13 13:00:00	10.84	59.08	35.12	725	4.14	152.16	1721.4	987.3	1484.8	651.2	14.04	42.34	0	0.658
2022-07-13 14:00:00	10.84	56.54	35.74	823.2	4.14	148.48	1994	986.72	1722.4	719.6	14	44.42	0	0.746
2022-07-13 15:00:00	10.84	53.84	36.26	620.6	4.36	133.56	1551.6	985.86	1301.2	495.6	13.96	45.04	0	0.424
2022-07-13 16:00:00	10.84	52.86	36.36	346.4	4.2	130.3	874.8	985.02	720.2	511	13.86	42.98	0	0.291
2022-07-13 17:00:00	10.84	54.06	36.22	334	3.84	133.84	842.2	984.38	664.8	314.4	13.78	42.4	0	0.278
2022-07-13 18:00:00	10.84	54.72	35.96	145.2	3.66	134.56	410.6	984.34	320.2	148.8	13.68	40.62	0	0.173
2022-07-13 19:00:00	10.84	55.1	35.6	20.8	3.26	144.74	71.8	984.92	52	42	13.58	35.72	0	0.105
2022-07-13 20:00:00	10.84	57.46	35.1	0	2.3	131.36	0.2	985.7	0.8	0.4	13.52	33.96	0	0.067
2022-07-13 21:00:00	10.84	59.18	34.54	0	2.7	144.2	0	986.46	0.8	0.4	13.48	33.06	0	#+INF
2022-07-13 22:00:00	10.84	61.58	33.94	0	2.18	136.3	0	987.24	0.6	0.4	13.46	32.32	0	0.054
2022-07-13 23:00:00	10.84	65.24	33.4	0	2.76	115.72	0	988.1	0.6	0.4	13.46	32.26	0	#+INF
2022-07-14	10.84	75.36	31.54	0	2.62	104.58	0.2	988.16	0.6	0.4	13.44	31.4	0	0.07	#+INF	9	82.5	50.9	36.6	29.9	0	987.31	538.9	238.3	13.83	36.44
2022-07-14 01:00:00	10.86	78.84	31.04	0	2.74	111.46	0.2	987.72	0.6	0.4	13.44	30.52	0	0.062
2022-07-14 02:00:00	10.86	79.2	31.16	0	2.88	114.66	0	987.5	0.6	0.4	13.46	30.42	0	0.064
2022-07-14 03:00:00	10.86	80.82	31.14	0	3.5	122.36	0.2	987.22	0.6	0.4	13.46	30.6	0	0.069
2022-07-14 04:00:00	10.86	84.78	30.32	0	3.22	127.36	0.2	987.08	0.6	0.4	13.46	29.66	0	0.051
2022-07-14 05:00:00	10.86	86.24	29.4	0	2.72	144.62	0.4	987.06	0.6	0.4	13.44	28.26	0	0.04
2022-07-14 06:00:00	10.86	84.38	29.56	27	2.92	119.66	75	987.26	65.8	50.8	13.44	29.02	0	0.066
2022-07-14 07:00:00	10.86	83.54	30.26	181.4	3	113.68	448.2	987.28	418	171.2	13.48	33	0	0.178
2022-07-14 08:00:00	10.84	78.12	31.24	402.6	4.84	140.16	958.6	987.74	906.6	212.2	13.56	37.24	0	0.356
2022-07-14 09:00:00	10.84	74.64	31.9	614.2	5.22	141.32	1494.8	988.36	1378.8	290.8	13.6	39.32	0	0.505
2022-07-14 10:00:00	10.84	72.8	32.7	792.4	4.68	132.56	1916.6	988.72	1768.4	378.2	13.68	41.66	0	0.628
2022-07-14 11:00:00	10.84	68.9	33.78	950.2	4.62	149.32	2244.6	988.34	2029.2	430.4	13.7	42.72	0	0.767
2022-07-14 12:00:00	10.84	64.44	34.36	587	5.06	150.98	1421.2	988.18	1225.2	608.2	13.68	42.02	0	0.547
2022-07-14 13:00:00	10.84	59.48	35.16	831.8	5.4	158.56	1945.2	987.56	1755.2	550.4	13.64	42.7	0	0.752
2022-07-14 14:00:00	10.84	54.92	36.02	713.4	5.56	146.16	1741.6	986.78	1501.6	547.4	13.6	43.96	0	0.708
2022-07-14 15:00:00	10.84	53.84	36.54	588.2	5.24	146.34	1462.6	985.66	1199.8	559.4	13.54	45.04	0	0.407
2022-07-14 16:00:00	10.84	53	36.76	609.2	5.26	154.48	1535.4	984.66	1252.6	350	13.46	44.48	0	0.422
2022-07-14 17:00:00	10.84	51.7	36.86	391	4.96	149.56	997.4	984.14	771.2	209.6	13.36	44.1	0	0.325
2022-07-14 18:00:00	10.84	51.88	36.66	137.8	4.22	132.4	391	984.2	304.4	146.2	13.24	40.58	0	0.19
2022-07-14 19:00:00	10.84	51.8	36.22	26.6	4.06	144.9	79.4	984.94	58.2	46	13.12	36.3	0	0.136
2022-07-14 20:00:00	10.84	58.88	34.4	0.2	5.12	137.86	0.2	985.76	0.8	0.4	13.06	33.92	0	0.12
2022-07-14 21:00:00	10.84	70.28	32.24	0	4.86	129.44	0	987.5	0.6	0.4	13	32.22	0	0.076
2022-07-14 22:00:00	10.86	75.14	31.5	0	4.32	138.04	0.2	988.68	0.6	0.4	12.98	31.52	0	0.055
2022-07-14 23:00:00	10.86	77.42	31.18	0	3.92	137.26	0.2	989.54	0.6	0.4	12.96	30.96	0	0.045
2022-07-15	10.86	80.5	30.78	0	3.48	134.82	0.4	989.64	0.6	0.4	12.96	30.64	0	0.07	6.64	11	90.2	51	37	29.2	0	987.15	610.05	189.8	13.39	36.285
2022-07-15 01:00:00	10.86	84.46	30.26	0.2	3.36	136.62	0.2	989.5	0.6	0.4	12.94	29.98	0	0.054
2022-07-15 02:00:00	10.86	86.08	30.02	0	3.3	135.86	0.2	989.38	0.6	0.4	12.94	29.6	0	0.047
2022-07-15 03:00:00	10.86	86.34	29.8	0	3.04	124.12	0.2	989.24	0.6	0.4	12.94	29.24	0	0.043
2022-07-15 04:00:00	10.86	87.66	29.38	0	3.18	128.92	0.2	989.14	0.6	0.4	12.94	28.9	0	0.041
2022-07-15 05:00:00	10.86	88.64	29.12	0.2	2.88	129.68	0.2	989.08	0.6	0.4	12.94	28.64	0	0.035
2022-07-15 06:00:00	10.86	89.64	28.92	14.6	3.2	126.66	40.4	989.28	31.4	30.4	12.96	28.7	0	0.044
2022-07-15 07:00:00	10.86	74.4	29.02	121.8	3.42	138.66	315.4	989.7	278	159.8	12.98	30.84	0	0.168
2022-07-15 08:00:00	10.86	61.24	29.92	360.2	3.76	140.72	876.6	989.96	795.6	314	13.06	36.2	0	0.373
2022-07-15 09:00:00	10.84	77.6	31.44	579.8	4.5	145.08	1418.6	990.16	1301.6	369.2	13.14	39.34	0	0.464
2022-07-15 10:00:00	10.84	62.64	33.04	702.2	5.1	160.98	1706.8	990.46	1599.6	357.4	13.2	41.1	0	0.616
2022-07-15 11:00:00	10.84	63.6	34.12	832.8	5.38	146.76	1982	990.48	1818.6	420.2	13.22	42.16	0	0.718
2022-07-15 12:00:00	10.84	56.08	34.92	783.8	6.22	152.54	1865.8	990.32	1656.2	475.4	13.22	42.8	0	0.745
2022-07-15 13:00:00	10.84	57.04	35.54	942.2	5.68	157.18	2218.2	989.78	1996	523.8	13.18	43.26	0	0.85
2022-07-15 14:00:00	10.84	54.44	36.06	674.6	5.52	159.52	1644.2	989.12	1433.8	683.8	13.12	43.56	0	0.683
2022-07-15 15:00:00	10.84	50.96	36.46	526.4	5.32	138.9	1331.2	988.02	1103.6	562	13	42.68	0	0.386
2022-07-15 16:00:00	10.84	49.38	36.82	523	5.12	158.14	1332.6	987.42	1082.8	494.4	12.94	44.36	0	0.393
2022-07-15 17:00:00	10.84	49.18	36.68	259.8	4.7	153.38	670	987.22	515.2	262	12.82	41.08	0	0.265
2022-07-15 18:00:00	10.84	49.42	36.48	165.8	4.52	148.7	445.6	987.18	354	172.8	12.72	39.76	0	0.214
2022-07-15 19:00:00	10.84	50.7	35.9	23.2	3.52	152.12	72	987.78	52.6	45.6	12.64	35.6	0	0.124
2022-07-15 20:00:00	10.84	52.7	35.18	0	2.9	145.04	0.2	988.34	0.8	0.4	12.58	33.72	0	0.093
2022-07-15 21:00:00	10.84	54.18	34.96	0	2.84	127.34	0	989.22	0.8	0.4	12.54	33.62	0	0.087
2022-07-15 22:00:00	10.84	63.7	33.44	0	4.04	118.66	0	990.3	0.6	0.4	12.52	32.88	0	0.086
2022-07-15 23:00:00	10.84	68.92	32	0	2.76	153.34	0	990.76	0.6	0.4	12.5	31.72	0	#+INF
2022-07-16	10.86	70.34	31.72	0	2.5	168.18	0	991	0.6	0.4	12.5	31.3	0	0.081	#+INF	11	91.5	0	37	28.7	0	989.285	584.4	203.1	12.9	35.875
2022-07-16 01:00:00	10.86	75.32	31.36	0	2.3	138.52	0.2	990.88	0.6	0.4	12.5	31.18	0	0.063
2022-07-16 02:00:00	10.86	82.48	30.34	0	2	172.9	0.2	990.68	0.6	0.4	12.48	30.34	0	0.039
2022-07-16 03:00:00	10.86	88.46	29.5	0	0.32	222	0.2	990.66	0.6	0.4	12.5	29.64	0	0.007
2022-07-16 04:00:00	10.86	89.32	29.08	0	0.48	190.44	0.2	990.72	0.6	0.4	12.5	29.24	0	0.008
2022-07-16 05:00:00	10.86	91.9	28.64	0	0.22	166.86	0.2	990.52	0.6	0.4	12.5	28.82	0	0.005
2022-07-16 06:00:00	10.86	88.1	29.16	14.6	0.7	135.04	38.2	990.46	31	29.6	12.5	29.26	0	0.023
2022-07-16 07:00:00	10.86	84.96	30.14	169.8	1.24	119.78	393.6	990.36	382.4	200.8	12.56	33.3	0	0.151
2022-07-16 08:00:00	10.84	80.52	30.96	363.8	2.64	142.4	851.4	990.58	799.8	351.6	12.64	37.74	0	0.307
2022-07-16 09:00:00	10.84	77.1	31.82	593	3.32	133.24	1413.6	990.7	1327.8	395.2	12.7	41.2	0	0.475
2022-07-16 10:00:00	10.84	72.74	32.62	446.4	3.44	156.84	1086.2	990.84	919.6	515.8	12.74	41.46	0	0.396
2022-07-16 11:00:00	10.84	68.08	33.4	526.2	3.2	140.94	1246.4	990.86	1031.8	588.6	12.72	40.68	0	0.452
2022-07-16 12:00:00	10.84	67.56	34.32	995.4	3.58	157.8	2282.2	990.62	1950	639.2	12.76	44.08	0	0.809
2022-07-16 13:00:00	10.84	64.34	34.78	521.8	3.84	136.68	1262.8	990.26	1013.6	657	12.72	43.08	0	0.485
2022-07-16 14:00:00	10.84	62.52	35.28	930	4.46	143.42	2130.6	989.7	1720	783.8	12.66	44.36	0	0.799
2022-07-16 15:00:00	10.84	60.42	35.88	627.6	4.26	142.5	1519.2	988.98	1220.8	708.2	12.58	43.9	0	0.408
2022-07-16 16:00:00	10.84	57.1	36.34	556.2	4.8	163.62	1373.2	988.24	1132.2	497.4	12.5	44.84	0	0.383
2022-07-16 17:00:00	10.84	54.78	36.22	263	4.8	161.52	671.4	987.92	529	387.6	12.38	42.26	0	0.249
2022-07-16 18:00:00	10.84	55.64	35.82	106.8	4.34	159.2	303	988.08	235.8	196.8	12.26	38.42	0	0.162
2022-07-16 19:00:00	10.84	56.16	35.46	24	3.82	139.68	65.4	988.72	50.4	47.8	12.18	35.66	0	0.116
2022-07-16 20:00:00	10.84	58.52	35.02	0	2.82	141.68	0	989.78	0.8	0.4	12.12	34.12	0	0.079
2022-07-16 21:00:00	10.84	63.16	34.56	0	2.36	125.92	0	991.1	0.6	0.4	12.1	33.7	0	0.058
2022-07-16 22:00:00	10.84	64.36	34.14	0	2.76	117.42	0.2	991.98	0.8	0.4	12.08	33.3	0	#+INF
2022-07-16 23:00:00	10.84	67.22	33.46	0	3.66	132.38	0	992.52	0.6	0.4	12.08	32.66	0	0.072
2022-07-17	10.84	71.98	32.5	0	3.48	132.26	0.2	992.78	0.6	0.4	12.06	31.82	0	0.102	#+INF	8	93.8	53.4	36.4	28.5	0	990.33	514.6	250.15	12.45	36.46
2022-07-17 01:00:00	10.86	77.32	31.48	0	3.5	134.16	0	992.44	0.6	0.4	12.04	30.96	0	0.082
2022-07-17 02:00:00	10.86	80.62	31.02	0	3.16	130.88	0.2	992.42	0.6	0.4	12.04	30.44	0	0.064
2022-07-17 03:00:00	10.86	80.7	30.74	0	3.24	140.92	0.2	992.32	0.6	0.4	12.04	30.06	0	0.065
2022-07-17 04:00:00	10.86	82.74	30.32	0	3.52	136.5	0.2	992.04	0.6	0.4	12.04	29.74	0	0.062
2022-07-17 05:00:00	10.86	86.86	30	0	3.26	117.7	0.2	992.18	0.6	0.4	12.04	29.4	0	0.044
2022-07-17 06:00:00	10.86	87.96	29.76	21.6	3.36	152.58	69.4	992.48	62.6	44.6	12.04	29.62	0	0.056
2022-07-17 07:00:00	10.86	86.8	30.16	170.6	3.26	129.94	428.8	992.66	405.4	173.6	12.1	33.28	0	0.162
2022-07-17 08:00:00	10.84	82.68	31.18	382.8	3.24	146.84	915.4	992.78	791.8	287.4	12.18	38.6	0	0.318
2022-07-17 09:00:00	10.84	76.06	32.34	438.6	4.18	148.32	1059.8	992.76	1009.2	368.4	12.24	40.9	0	0.389
2022-07-17 10:00:00	10.84	70.3	33.28	818.4	5	151.48	1918.8	992.68	1609.6	645.6	12.26	41.74	0	0.664
2022-07-17 11:00:00	10.84	64.48	34.32	913.6	5.16	144.62	2153.6	992.42	1908.8	673.6	12.3	43.56	0	0.771
2022-07-17 12:00:00	10.84	61.72	34.74	750.6	5.12	156.78	1757	992	1472	664.2	12.28	43.44	0	0.677
2022-07-17 13:00:00	10.84	60.72	35.34	572.6	5.14	125.74	1362	991.36	1169.2	618.8	12.26	43.96	0	0.566
2022-07-17 14:00:00	10.84	58.92	35.88	657.2	4.6	143.12	1581	990.8	1350	697.4	12.22	44.1	0	0.629
2022-07-17 15:00:00	10.84	58.08	36.2	603	4.54	146.38	1482.4	990.26	1169.2	605.2	12.18	44.9	0	0.403
2022-07-17 16:00:00	10.84	56.92	36.48	462.2	4.32	141.86	1158.2	989.84	946	443	12.14	45.1	0	0.341
2022-07-17 17:00:00	10.84	55	36.32	281.4	4.34	136.6	728.6	989.14	575.6	288.6	12.06	43.2	0	0.254
2022-07-17 18:00:00	10.84	56.56	35.72	97.4	4.3	125.64	262	989	206.6	158	11.96	38	0	0.154
2022-07-17 19:00:00	10.84	56.82	35.24	15.8	3.42	128.18	46.2	989.46	34.6	30.8	11.9	35.52	0	0.102
2022-07-17 20:00:00	10.84	59.6	34.72	0	2.82	134.36	0.2	990.18	0.8	0.4	11.86	34.3	0	0.076
2022-07-17 21:00:00	10.84	61.76	34.24	0	2.32	133.74	0	991.08	0.8	0.4	11.84	33.62	0	#+INF
2022-07-17 22:00:00	10.84	64.28	33.76	0	2.22	128.5	0	991.86	0.6	0.4	11.84	32.94	0	0.05
2022-07-17 23:00:00	10.84	67.18	33.12	0	2.16	130.16	0.2	992.28	0.6	0.4	11.82	32.12	0	#+INF
2022-07-18	10.86	68.94	32.74	0	2.26	124.36	0.2	992.12	0.6	0.4	11.82	31.96	0	0.079	#+INF	9	88.8	53.1	36.7	29.6	0	991.525	529.9	237.65	12.065	36.73
2022-07-18 01:00:00	10.86	70.26	32.3	0	2.96	127.74	0.2	991.72	0.6	0.4	11.82	31.84	0	0.095
2022-07-18 02:00:00	10.86	71.18	31.7	0	3	146.52	0.2	991.38	0.6	0.4	11.82	30.88	0	0.092
2022-07-18 03:00:00	10.86	73.78	30.98	0	3.22	146.62	0.2	991	0.6	0.4	11.8	30.24	0	0.088
2022-07-18 04:00:00	10.86	78.7	30.26	0	2.86	137.6	0.2	990.7	0.6	0.4	11.8	29.6	0	0.064
2022-07-18 05:00:00	10.86	82.6	29.84	0	3.02	124.78	0	990.62	0.6	0.4	11.8	29.18	0	0.055
2022-07-18 06:00:00	10.86	85.16	29.52	18.4	3.48	123.56	57.4	991.02	48.2	40.4	11.82	29.36	0	0.064
2022-07-18 07:00:00	10.86	86.14	29.72	157.2	3.34	130.32	397.6	991.7	362	193.4	11.86	32.48	0	0.154
2022-07-18 08:00:00	10.84	82.56	30.58	359.8	3.72	121	878	992.16	757.6	332.2	11.94	37.52	0	0.302
2022-07-18 09:00:00	10.84	77.64	31.56	601.2	3.9	135.38	1457.4	992.42	1323.2	457.8	12	41	0	0.477
2022-07-18 10:00:00	10.84	73.4	32.62	584	3.62	136.42	1432.4	992.4	1200.2	499.6	12.06	43.44	0	0.484
2022-07-18 11:00:00	10.84	68.56	33.74	836.8	3.78	144.02	1992.6	992.12	1794.4	583.2	12.1	45.06	0	0.685
2022-07-18 12:00:00	10.84	63.3	34.74	752.8	4.18	138	1506.6	991.56	1656.8	607.2	12.12	46.78	0	0.659
2022-07-18 13:00:00	10.84	61.66	35.08	763.4	3.92	139.78	1833.8	991.04	1519.2	746.4	12.06	45.18	0	0.673
2022-07-18 14:00:00	10.84	61.22	35.44	398.4	3.82	133	980	990.2	776.2	596	12	44.76	0	0.411
2022-07-18 15:00:00	10.84	61.14	35.44	496	3.64	149.44	1251.2	989.58	1019.8	709.6	11.92	43.82	0	0.34
2022-07-18 16:00:00	10.84	57.32	35.84	466.6	3.94	151.06	1181.4	988.8	945.8	563.2	11.9	45.5	0	0.336
2022-07-18 17:00:00	10.84	56.3	35.78	318.6	3.74	150.58	809	988.28	629.4	431.8	11.82	43.68	0	0.261
2022-07-18 18:00:00	10.84	56.36	35.64	152	3.42	136.84	411.8	988.1	321.2	174	11.74	40.74	0	0.168
2022-07-18 19:00:00	10.84	56.44	35.16	25.2	3.02	138.68	71.6	988.32	51.8	46	11.66	36	0	0.096
2022-07-18 20:00:00	10.84	58.1	34.7	0	2.68	132.34	0	989.1	0.8	0.4	11.62	33.86	0	0.075
2022-07-18 21:00:00	10.84	60.28	34.16	0	2.42	145.28	0.2	989.68	0.6	0.4	11.6	33.12	0	0.063
2022-07-18 22:00:00	10.84	60.78	33.9	0	2.52	135.04	0	990.38	0.6	0.4	11.58	32.68	0	#+INF
2022-07-18 23:00:00	10.84	63.76	33.22	0	2.14	147.22	0.2	990.7	0.6	0.4	11.58	32.04	0	0.048
2022-07-19	10.84	66	32.76	0	1.8	153.4	0.2	990.56	0.6	0.4	11.58	31.94	0	0.071	#+INF	10	86.5	55.4	36.1	29.5	0	990.565	517.15	249.35	11.835	37.11
2022-07-19 01:00:00	10.86	68.58	32.32	0	1.48	137.48	0.2	990.36	0.6	0.4	11.6	31.8	0	0.055
2022-07-19 02:00:00	10.86	72.76	31.52	0	1.86	143.9	0.2	990.28	0.6	0.4	11.58	30.94	0	0.058
2022-07-19 03:00:00	10.86	74.94	31.12	0	0.84	166.98	0.2	989.9	0.6	0.4	11.58	30.12	0	0.027
2022-07-19 04:00:00	10.86	74.56	30.92	0	0.82	267.68	0.2	989.98	0.6	0.4	11.58	30.06	0	0.027
2022-07-19 05:00:00	10.86	76.62	30.36	0	0.88	236.54	0.2	990.16	0.6	0.4	11.58	29.6	0	0.026
2022-07-19 06:00:00	10.86	77.78	30.02	18.6	0.48	254.78	56.2	990.66	45.4	41	11.6	29.56	0	0.03
2022-07-19 07:00:00	10.86	74.96	30.84	153.6	0.8	224.58	389	991.24	344	223.8	11.66	34.12	0	0.145
2022-07-19 08:00:00	10.84	73.32	31.26	343.6	1.3	181.14	853.6	991.66	726.6	390.6	11.74	39.08	0	0.295
2022-07-19 09:00:00	10.84	71.76	32.02	551.6	1.36	235.38	1360	991.64	1228	499.8	11.8	43.18	0	0.447
2022-07-19 10:00:00	10.84	67.52	33.38	712.8	1.24	201.66	1747.2	991.46	1508.6	567.2	11.86	46.28	0	0.567
2022-07-19 11:00:00	10.84	61.8	34.52	844.6	1.28	192.68	2037.2	991.16	1832.4	613.6	11.9	48.1	0	0.687
2022-07-19 12:00:00	10.84	60.52	35.16	804.2	1.28	202.04	1899.6	990.68	1668	652	11.88	48.3	0	0.662
2022-07-19 13:00:00	10.84	57.54	35.78	943.8	2	170.6	2236.6	990.08	1930.4	635.2	11.86	49.4	0	0.796
2022-07-19 14:00:00	10.84	55.52	36.64	761.8	1.68	175.36	1895.8	989.08	1593.6	707.2	11.82	50.52	0	0.656
2022-07-19 15:00:00	10.82	53.12	37.14	716.2	1.58	240.98	1766.4	988.28	1432.2	732.6	11.76	51.36	0	0.528
2022-07-19 16:00:00	10.82	50.32	37.6	533.8	1.74	203.1	1347.8	987.52	1093.6	597	11.68	51.86	0	0.408
2022-07-19 17:00:00	10.82	51.12	37.02	196	1.3	210.06	505.8	987.22	403.4	346	11.54	44.74	0	0.163
2022-07-19 18:00:00	10.84	51.18	36.66	91.8	1.14	203.98	222.4	987.22	177.2	168.2	11.42	39.74	0	0.081
2022-07-19 19:00:00	10.84	51.64	36.26	14.2	0.64	244.6	34	987.78	26	25.8	11.36	37.22	0	0.014
2022-07-19 20:00:00	10.84	54.66	35.64	0	0.54	203.9	0.2	988.68	0.8	0.4	11.32	35.36	0	0.001
2022-07-19 21:00:00	10.84	59.2	34.74	0	0.8	152.22	0.2	989.26	0.8	0.4	11.3	34.6	0	0.012
2022-07-19 22:00:00	10.84	69.78	33.2	0	2.14	108.02	0	990.06	0.6	0.4	11.28	33.68	0	0.039
2022-07-19 23:00:00	10.84	73.96	32.46	0	2.12	124.02	0	990.56	0.6	0.4	11.28	33	0	0.031
2022-07-20	10.84	77.42	32.08	0	1.52	166.18	0.2	990.62	0.6	0.4	11.28	32.48	0	0.041	5.8	10	78.3	47.2	37.7	29.9	0	989.815	584.05	258.5	11.595	38.96
2022-07-20 01:00:00	10.86	73.8	32.42	0	0.82	200.32	0.2	990.36	0.6	0.4	11.3	32.54	0	0.028
2022-07-20 02:00:00	10.86	72.66	32.18	0	1.32	280.96	0	989.96	0.6	0.4	11.3	32.26	0	0.043
2022-07-20 03:00:00	10.86	74.34	31.66	0	1.5	247.48	0.2	989.64	0.6	0.4	11.3	31.82	0	0.045
2022-07-20 04:00:00	10.86	77.48	31.2	0	1.32	236.54	0.2	989.64	0.6	0.4	11.3	31.04	0	0.036
2022-07-20 05:00:00	10.86	80.72	30.84	0	0.84	262.52	0.4	989.86	0.6	0.4	11.3	30.38	0	0.021
2022-07-20 06:00:00	10.86	80.48	30.8	15	0.84	258.44	34.4	990.48	26.4	25.8	11.3	30.72	0	0.033
2022-07-20 07:00:00	10.86	78.12	30.82	92.8	1.24	284.64	222.2	991.1	176.2	174.4	11.34	32.06	0	0.104
2022-07-20 08:00:00	10.84	75.2	31.5	391.8	1.96	278.14	895.2	991.26	752.2	611.8	11.42	38.5	0	0.336
2022-07-20 09:00:00	10.84	73.04	32.18	530.8	2.24	297.98	1270.2	991.8	1038.8	714.4	11.5	42.46	0	0.44
2022-07-20 10:00:00	10.84	70.62	32.92	558.6	2.18	322.96	1360.4	992.14	1162.6	974.6	11.56	44.68	0	0.463
2022-07-20 11:00:00	10.84	70.78	32.78	244.2	1.9	306.34	606	992.54	484	475.6	11.48	39.32	0	0.235
2022-07-20 12:00:00	10.84	73.24	32.74	387.2	1.94	277.4	951.6	992.14	769.2	732.6	11.46	40.18	0	0.315
2022-07-20 13:00:00	10.84	69.94	33.46	475.8	1.4	258.7	1186.8	991.24	952.4	920.8	11.48	43.14	0	0.383
2022-07-20 14:00:00	10.84	64.82	34.9	591.6	1.5	230.5	1458.2	989.9	1220.2	927.4	11.54	47.14	0	0.492
2022-07-20 15:00:00	10.84	70.94	33.84	136.8	1.22	193.4	345.4	989.22	274	271.6	11.4	38.7	0	0.098
2022-07-20 16:00:00	10.84	78.08	32.32	71.2	1.34	169.08	179.6	988.64	140.6	139.4	11.32	34.96	0	0.046
2022-07-20 17:00:00	10.84	82.98	31.54	87.2	2.68	141.58	209.6	988.88	164	162.6	11.28	34.02	0	0.059
2022-07-20 18:00:00	10.84	83.98	31.12	48	2.38	147.52	114	989.5	88.4	87.6	11.28	32.92	0	0.033
2022-07-20 19:00:00	10.86	83.7	31.02	6.4	2.06	120.66	15.4	990.4	10.8	10.4	11.26	32.02	0	0.016
2022-07-20 20:00:00	10.86	90.26	28.96	0	3.2	138.96	0.2	991.74	0.6	0.4	11.24	30.48	0	0.009
2022-07-20 21:00:00	10.86	97.42	26.32	0	2.16	168.04	0.2	992.5	0.6	0.4	11.22	27.22	2.8	-0.01
2022-07-20 22:00:00	10.86	100	25.76	0	1.64	279.3	0.2	992.74	0.6	0.4	14.26	26.34	6.4	-0.015
2022-07-20 23:00:00	10.86	100	26	0	0.68	258.3	0.2	992.34	0.6	0.4	17.26	26.8	0	-0.018
2022-07-21	10.86	100	26.08	0	0.6	248.82	0.2	992.24	0.6	0.4	16.84	26.94	0	0.003	3.19	1	100	62.9	35.3	25.7	9.2	990.845	302.75	259.7	11.955	34.445
2022-07-21 01:00:00	10.86	100	25.96	0.2	0.7	273.28	0.2	992.04	0.6	0.4	16.58	26.98	0	0.003
2022-07-21 02:00:00	10.86	100	25.9	0	1.22	317.24	0.2	991.68	0.6	0.4	16.36	26.88	0	0.003
2022-07-21 03:00:00	10.86	99.32	25.84	0	1.36	271.3	0	991.3	0.6	0.4	16.2	26.7	0	0.004
2022-07-21 04:00:00	10.86	99.98	25.78	0	0.74	262.6	0.2	991.5	0.6	0.4	17.5	26.42	3	0.003
2022-07-21 05:00:00	10.86	100	25.9	0	1.08	114.6	0.2	991.7	0.6	0.4	17.5	26.58	0.2	0.003
2022-07-21 06:00:00	10.86	99.64	25.92	1.4	1.46	270.24	3.8	992.06	2.6	2.2	17.52	26.5	1.2	0.004
2022-07-21 07:00:00	10.86	99.98	25.96	2.6	0.94	133.72	8.4	992.72	6	5.6	19.12	26.52	8.6	0.005
2022-07-21 08:00:00	10.86	100	25.64	3.8	1.22	90.88	15	993.48	11.8	11.2	21.08	26.3	41.8	0.006
2022-07-21 09:00:00	10.86	100	25.58	11	1.4	31.96	36.2	993.68	31.8	31.4	21.48	26.22	6	0.011
2022-07-21 10:00:00	10.86	100	25.8	38.4	1.1	87.58	101.8	993.8	92	91	21.42	26.72	2.8	0.03
2022-07-21 11:00:00	10.86	100	26.04	158.2	1.38	179.8	377.8	993.88	343	340	21.32	27.7	0.4	0.109
2022-07-21 12:00:00	10.86	98.14	26.92	361.2	1.74	26.6	854.8	993.9	748.2	735.8	21.3	29.74	0	0.223
2022-07-21 13:00:00	10.86	94.38	27.68	333.6	1.84	83.32	817	993.62	684.4	672.4	21.28	31.62	0	0.213
2022-07-21 14:00:00	10.86	94.82	27.66	209.8	1.6	43.4	528.8	993.26	435.6	432	21.34	31.06	0	0.125
2022-07-21 15:00:00	10.86	95.62	27.5	144	1.52	39.28	359.2	992.66	291.2	288.2	21.34	30.68	0	0.061
2022-07-21 16:00:00	10.86	95.7	27.46	137.6	1.22	191.42	332	991.66	272.2	269.6	21.36	30.32	0	0.059
2022-07-21 17:00:00	10.86	97	27.58	121.4	0.98	276.54	290.6	991.72	239.2	237	21.4	30.14	0	0.051
2022-07-21 18:00:00	10.86	95.62	27.66	82.2	0.98	71.84	192.6	991.9	156.4	155	21.42	29.7	0	0.027
2022-07-21 19:00:00	10.86	98.28	27.56	12.6	0.68	136.48	28.4	992.62	21.8	21.2	21.44	28.76	0	-0.011
2022-07-21 20:00:00	10.86	99.84	27.4	0	0.62	51.16	0.2	993.44	0.6	0.4	21.48	28.24	0	-0.016
2022-07-21 21:00:00	10.86	99.88	27.3	0.2	0.68	52.98	0.2	993.82	0.6	0.4	21.52	27.82	0	-0.016
2022-07-21 22:00:00	10.86	100	27.18	0	0.58	73.24	0.2	994.32	0.6	0.4	21.56	27.64	0	-0.017
2022-07-21 23:00:00	10.86	100	27.24	0	0.7	76.52	0.2	994.7	0.6	0.4	21.58	27.7	0	-0.016
2022-07-22	10.86	100	27.2	0	1.04	108.54	0.2	994.78	0.6	0.4	21.58	27.64	0	0.002	0.87	0	100	80.1	27.8	25.4	64	992.93	139.25	137.35	20.195	28.105
2022-07-22 01:00:00	10.86	99.72	27.18	0	0.8	91.74	0.2	994.56	0.6	0.4	21.6	27.66	0	0.003
2022-07-22 02:00:00	10.86	100	27.24	0	0.46	84.12	0.2	993.96	0.6	0.4	21.62	27.66	0	0.003
2022-07-22 03:00:00	10.86	100	27.22	0	0.04	190.72	0.2	993.72	0.6	0.4	21.62	27.56	0	0.003
2022-07-22 04:00:00	10.86	100	27.1	0	0.14	172	0.2	993.62	0.6	0.4	21.64	27.52	0	0.003
2022-07-22 05:00:00	10.86	100	27.02	0	0.1	244.18	0.2	993.52	0.6	0.4	21.64	27.3	0	0.003
2022-07-22 06:00:00	10.86	100	26.98	6.4	0.16	286.76	16	994.1	11.6	11	21.66	27.44	0	0.008
2022-07-22 07:00:00	10.86	100	27.6	106.8	0.36	115.08	244.6	994.6	201.2	199.2	21.68	28.9	0	0.084
2022-07-22 08:00:00	10.86	99.68	28.16	197.4	1.4	146.62	475	994.94	398.2	386.2	21.66	30.64	0	0.146
2022-07-22 09:00:00	10.86	92.8	28.86	300.8	1.3	120.98	715.8	994.86	601.4	591.2	21.66	33.44	0	0.228
2022-07-22 10:00:00	10.84	92.38	29.46	291.8	1.18	124.5	707.2	994.86	582	571.8	21.6	34.48	0	0.222
2022-07-22 11:00:00	10.84	90.26	29.58	254.6	1.22	106.34	611	994.86	496.2	484.2	21.56	33.7	0	0.194
2022-07-22 12:00:00	10.84	89.5	30.46	481	1.38	106.42	1158.2	994.18	949.4	901.8	21.4	36.82	0	0.348
2022-07-22 13:00:00	10.84	88.96	30.86	408	1.36	97.38	990.8	993.22	824.6	768	21.32	36.32	0	0.297
2022-07-22 14:00:00	10.84	87.5	31.38	350.2	1.56	107.12	866.8	992.32	709.2	667.2	21.22	37.02	0	0.258
2022-07-22 15:00:00	10.84	91.7	30.34	174.8	2.28	105.86	438.4	991.76	350.4	347.4	21.14	33.04	0	0.089
2022-07-22 16:00:00	10.84	91.84	30.32	244.2	1.16	88.56	595	991.34	479.8	476	21.12	33.78	0	0.142
2022-07-22 17:00:00	10.84	90.82	30.46	200.8	1.82	103.2	483.2	991.06	377.8	365.6	21.06	33.84	0	0.109
2022-07-22 18:00:00	10.84	92.36	29.96	57.6	1.66	111.32	139	991.42	108.6	107.6	21.02	31.3	0	0.022
2022-07-22 19:00:00	10.86	91.6	29.58	6.6	1.74	113.26	15.6	991.74	11.2	10.8	21.02	29.7	0	0.001
2022-07-22 20:00:00	10.86	94.16	29.08	0	1.84	108.34	0.2	992.56	0.6	0.4	21	28.92	0	-0.004
2022-07-22 21:00:00	10.86	96.4	29.02	0	1.74	114.58	0.2	992.9	0.6	0.4	21	28.66	0	-0.008
2022-07-22 22:00:00	10.86	96.08	29.12	0	2.4	140.28	0.2	993.42	0.6	0.4	20.98	28.62	0	-0.005
2022-07-22 23:00:00	10.86	96.58	29.06	0	2.08	127.82	0.2	993.58	0.6	0.4	20.98	28.44	0	-0.006
2022-07-23	10.86	98.82	28.66	0.2	2.26	105.24	0.2	993.22	0.6	0.4	20.96	28.3	0	-0.001	2.14	0	100	79.5	31.5	26.9	0	993.345	254.5	245.5	21.34	30.88
2022-07-23 01:00:00	10.86	99.98	28.32	0	2.68	113.34	0.2	992.82	0.6	0.4	20.94	28.08	0	0.002
2022-07-23 02:00:00	10.86	99.98	28.22	0	2.84	152.66	0.2	992.62	0.6	0.4	20.92	27.98	0	0.002
2022-07-23 03:00:00	10.86	100	28.08	0	2.88	140.98	0.2	992.62	0.6	0.4	20.9	27.68	0	0.002
2022-07-23 04:00:00	10.86	100	27.96	0	3.26	137.24	0.2	992.5	0.6	0.4	20.88	27.54	0	0.002
2022-07-23 05:00:00	10.86	99.22	27.94	0	3.12	133.42	0.2	992.64	0.6	0.4	20.88	27.52	0	0.005
2022-07-23 06:00:00	10.86	100	28.04	17.6	3.24	132.94	37.8	992.68	28.8	28.4	20.86	27.82	0	0.014
2022-07-23 07:00:00	10.86	99.18	28.24	131	3.08	151.38	314.4	992.88	259.2	234.4	20.84	29.32	0	0.092
2022-07-23 08:00:00	10.86	93.92	29.26	379.4	3.48	149.36	906	992.94	802.8	488.2	20.82	34.06	0	0.269
2022-07-23 09:00:00	10.84	89.74	30.18	474	3.62	153.04	1180.6	993.16	1062.2	474.6	20.7	36.5	0	0.345
2022-07-23 10:00:00	10.84	87.3	31.1	573	3.66	150.14	1421	993.26	1254.8	633.2	20.56	37.2	0	0.418
2022-07-23 11:00:00	10.84	80.22	32.12	995	4.18	153.8	2371.4	993.16	2140.8	766	20.36	38.6	0	0.732
2022-07-23 12:00:00	10.84	76.06	32.9	548.4	3.78	142.86	1396.4	992.7	1203.6	720.8	20.14	38.72	0	0.447
2022-07-23 13:00:00	10.84	72.78	33.5	795.4	3.92	147	1917.8	991.98	1615.6	774.4	19.94	38.94	0	0.639
2022-07-23 14:00:00	10.84	72.82	33.82	896	4.08	123.94	2149.6	990.94	1826.4	907.4	19.76	39.72	0	0.715
2022-07-23 15:00:00	10.84	73.66	33.58	295.6	3.64	125.36	750.2	990.26	600.4	555	19.6	37.24	0	0.195
2022-07-23 16:00:00	10.84	69.7	33.98	389.2	4.02	133.72	1009.4	989.26	799	560.8	19.52	37.96	0	0.251
2022-07-23 17:00:00	10.84	70.52	34.1	273	3.3	128.92	703.4	988.76	551.6	399.6	19.44	37.68	0	0.194
2022-07-23 18:00:00	10.84	72.48	33.74	87	3.22	116.56	216.6	988.98	171.2	145.2	19.4	34.44	0	0.09
2022-07-23 19:00:00	10.84	75	33.2	22.6	2.76	128.5	54	989.9	40.6	39.2	19.38	32.06	0	0.048
2022-07-23 20:00:00	10.84	78.4	32.54	0	2.64	119.2	0.2	990.88	0.6	0.4	19.4	31.1	0	0.032
2022-07-23 21:00:00	10.86	81.18	31.6	0	2.04	172.54	0	991.74	0.6	0.4	19.4	30.48	0	0.018
2022-07-23 22:00:00	10.86	86.16	31.04	0	1.84	116.94	0.2	992.4	0.6	0.4	19.42	29.68	0	0.008
2022-07-23 23:00:00	10.86	90.56	30.56	0	1.3	127.24	0.2	992.92	0.6	0.4	19.42	29.26	0	-0.002
2022-07-24	10.86	86.92	30.46	0	1.56	137.32	0.2	992.72	0.6	0.4	19.44	29	0	0.021	4.54	8	100	68.2	34.3	27.9	0	991.86	515.15	280.5	20.12	32.855
2022-07-24 01:00:00	10.86	83.42	30.06	0	1.7	133.14	0.2	992.66	0.6	0.4	19.44	28.54	0	0.032
2022-07-24 02:00:00	10.86	84.1	29.58	0	1.92	138.36	0.2	992.28	0.6	0.4	19.46	28.08	0	0.035
2022-07-24 03:00:00	10.86	86.76	29.14	0	2.64	132.32	0.4	991.98	0.6	0.4	19.46	27.82	0	0.037
2022-07-24 04:00:00	10.86	92	28.78	0	3	127.36	0.2	992.08	0.6	0.4	19.46	27.64	0	0.026
2022-07-24 05:00:00	10.86	91.84	28.5	0	3.44	138.9	0.2	992.4	0.6	0.4	19.46	27.5	0	0.029
2022-07-24 06:00:00	10.86	93.92	28.16	16.4	3.32	129.34	43	992.62	33.2	32.6	19.46	27.38	0	0.032
2022-07-24 07:00:00	10.86	96.48	28.4	154	3.34	133.5	379.2	992.84	315.2	259.6	19.46	30.06	0	0.115
2022-07-24 08:00:00	10.86	95.34	28.76	315	3.86	130.4	752.6	993.26	661.4	475.8	19.44	32.08	0	0.219
2022-07-24 09:00:00	10.86	91.1	29.8	526	3.74	147.66	1277.8	993.3	1133.2	635.2	19.38	35.98	0	0.369
2022-07-24 10:00:00	10.84	86.4	30.72	583	3.48	140	1418.6	993.34	1243.4	815.4	19.26	37.58	0	0.425
2022-07-24 11:00:00	10.84	82.54	31.64	665.4	3.64	144.1	1629.8	993.3	1425.4	922	19.1	38.68	0	0.496
2022-07-24 12:00:00	10.84	78.76	32.24	839.8	3.96	144.1	1994.2	992.92	1722	870.6	18.9	38.04	0	0.634
2022-07-24 13:00:00	10.84	74.14	33.44	723.6	3.44	132.94	1779.6	992.14	1530.4	831.6	18.7	39.9	0	0.582
2022-07-24 14:00:00	10.84	71.44	33.74	530.4	3.4	153.88	1303.8	991.3	1094.8	764.8	18.52	39.22	0	0.453
2022-07-24 15:00:00	10.84	70.4	33.52	199.4	3.12	137.98	528.8	990.32	429	395.6	18.4	36.16	0	0.151
2022-07-24 16:00:00	10.84	70.02	33.78	331	3.56	122.16	839.6	989.7	664	478.4	18.34	36.84	0	0.222
2022-07-24 17:00:00	10.84	66.64	33.84	238.4	4.3	123.74	617.2	989.54	481.4	316.6	18.24	36.52	0	0.185
2022-07-24 18:00:00	10.84	69.54	33.64	127.6	4.06	119.62	307.6	990	260.6	185.2	18.16	34.9	0	0.124
2022-07-24 19:00:00	10.84	81.28	31.22	25.2	4	137.96	58	991.24	44	43.2	18.12	30.94	0	0.043
2022-07-24 20:00:00	10.86	89.36	29.22	0	3.54	156.32	0.2	992.68	0.6	0.4	18.38	28.5	1.2	0.013
2022-07-24 21:00:00	10.86	92.68	28.4	0	2.72	163	0.4	993.78	0.6	0.4	18.84	27.28	0	0.001
2022-07-24 22:00:00	10.86	99.28	26.96	0	3.22	152.84	0.2	994.86	0.6	0.4	20.54	26.64	9.8	-0.01
2022-07-24 23:00:00	10.86	97.7	27.78	0	2.28	125.52	0.2	995.18	0.6	0.4	21.28	26.86	0.2	-0.009
2022-07-25	10.86	98.14	27.72	0	2.72	138.16	0.2	995.28	0.6	0.4	21.36	26.88	0	-0.001	4.2	6	100	65.3	34.2	26.5	11.2	992.46	460.2	292.95	19.215	32.085
2022-07-25 01:00:00	10.86	97.6	27.78	0	2.66	135.58	0.2	994.82	0.6	0.4	21.42	26.98	0	0.009
2022-07-25 02:00:00	10.86	98.56	27.44	0	2.88	135.22	0.2	994.38	0.6	0.4	21.44	26.88	1	0.006
2022-07-25 03:00:00	10.86	99.98	26.48	0.2	3	146.16	0.2	994.12	0.6	0.4	21.48	26.38	1	0.003
2022-07-25 04:00:00	10.86	100	26.64	0	2.48	142.08	0.2	994.12	0.6	0.4	21.46	26.46	0	0.003
2022-07-25 05:00:00	10.86	100	26.6	0	2.68	143.4	0.2	994.62	0.6	0.4	21.36	26.4	0.2	0.003
2022-07-25 06:00:00	10.86	100	26.34	1.4	2.68	157.84	3.6	994.94	2.4	2	21.46	26.34	2.2	0.003
2022-07-25 07:00:00	10.86	99.98	25.86	5.6	2.56	133.96	15.4	995.58	11.6	11	21.6	26.04	3.2	0.006
2022-07-25 08:00:00	10.86	100	25.98	32.4	1.9	135.52	79.2	995.92	71.6	70.8	21.66	26.34	1.2	0.025
2022-07-25 09:00:00	10.86	100	26.82	234.4	2.26	138.76	533.8	996.26	483.4	479	21.68	28.2	0	0.159
2022-07-25 10:00:00	10.86	97.76	28.76	571.8	3.32	166.74	1331.8	996.28	1160	1009.8	21.66	32.96	0	0.369
2022-07-25 11:00:00	10.84	92.16	29.78	651.2	4.04	163.52	1533.6	996.18	1326	1043.6	21.62	34.98	0	0.433
2022-07-25 12:00:00	10.84	88.58	31	884.6	3.56	151.86	2126.6	995.76	1857.4	1152.4	21.58	38.3	0	0.622
2022-07-25 13:00:00	10.84	85.64	31.62	876.8	3.36	141.58	2103.4	995.08	1816.8	1167	21.36	39.14	0	0.637
2022-07-25 14:00:00	10.84	82.42	32.42	820.6	3	127.9	1986.8	994.12	1755.2	981.6	21.08	40.12	0	0.619
2022-07-25 15:00:00	10.84	81.14	32.58	579.2	3.2	122.54	1352.4	992.98	1217.2	759.6	20.9	38.9	0	0.321
2022-07-25 16:00:00	10.84	81.86	32.48	360.8	3.32	146.66	891.2	992.26	724.8	497.2	20.78	37.2	0	0.206
2022-07-25 17:00:00	10.84	98.18	26.56	3.4	2.44	220.96	10.8	993.56	8	7.4	21.24	28.16	18.6	-0.009
2022-07-25 18:00:00	10.86	99.98	25.82	8	1.8	149.7	21.4	994.44	18.2	17.4	21.66	27.34	13.4	-0.012
2022-07-25 19:00:00	10.86	98.72	26.6	0.4	2.04	113.1	1.4	995.14	0.8	0.4	21.72	27.56	0.4	-0.012
2022-07-25 20:00:00	10.86	99.98	26.68	0	1.18	101.66	0.4	995.86	0.6	0.4	21.74	27.72	0.8	-0.015
2022-07-25 21:00:00	10.86	100	26.54	0	1.32	97.22	0.2	996.92	0.6	0.4	21.76	27.48	0	-0.015
2022-07-25 22:00:00	10.86	100	26.72	0	0.98	110.74	0.2	997.12	0.6	0.4	21.78	27.38	0	-0.016
2022-07-25 23:00:00	10.86	97.98	26.96	0.2	0.78	96.72	0	997.6	0.6	0.4	21.8	27.38	0.4	-0.016
2022-07-26	10.86	100	26.94	0	1.18	121.94	0.2	997.58	0.6	0.4	21.82	27.32	0.2	0.003	3.33	5	100	71.8	33	25.4	42.6	995.235	435.85	300.1	21.5	30.08
2022-07-26 01:00:00	10.86	100	27.1	0	0.8	122.52	0.2	997.74	0.6	0.4	21.82	27.44	0	0.003
2022-07-26 02:00:00	10.86	100	27.1	0	1.7	132.1	0.2	997.32	0.6	0.4	21.84	27.16	0	0.003
2022-07-26 03:00:00	10.86	98.88	26.92	0	1.36	95.38	0.2	996.84	0.6	0.4	21.86	27.04	0	0.004
2022-07-26 04:00:00	10.86	100	26.8	0	1.34	93.06	0.2	996.66	0.6	0.4	21.86	26.98	0	0.003
2022-07-26 05:00:00	10.86	100	26.54	0	1.18	95.62	0.2	996.7	0.6	0.4	21.88	26.72	0	0.003
2022-07-26 06:00:00	10.86	100	26.56	15.8	0.88	117.54	32.6	996.98	30.8	30.2	21.9	26.7	0	0.014
2022-07-26 07:00:00	10.86	99.98	27.28	108	1.6	140.94	188.8	997.44	219.8	214	21.9	28.04	0	0.079
2022-07-26 08:00:00	10.86	98.94	28.16	299	1.64	165.38	501.6	997.86	620	502.8	21.9	31.3	0	0.214
2022-07-26 09:00:00	10.84	96.96	29.44	491.6	1.66	139.92	877.6	998.32	1096.6	685.6	21.88	36.28	0	0.353
2022-07-26 10:00:00	10.84	90.22	30.78	726.8	1.48	148.6	1297.6	998.26	1608.4	813	21.8	39.4	0	0.535
2022-07-26 11:00:00	10.84	86.08	31.66	791.4	1.66	168.96	1422	997.72	1743.6	903.2	21.72	39.96	0	0.595
2022-07-26 12:00:00	10.84	82.54	32.44	634.4	1.34	132.54	1167	997.1	1362.8	887.8	21.66	40.44	0	0.489
2022-07-26 13:00:00	10.84	80.68	32.86	488.6	1.18	135.88	905.2	996.38	1057.2	796.2	21.62	39.44	0	0.38
2022-07-26 14:00:00	10.84	83.98	31.24	196.2	2.56	140.34	377.8	995.68	415.8	411.2	21.38	35.14	0	0.154
2022-07-26 15:00:00	10.84	88.12	30.44	480	2.24	125.56	890.2	994.74	986.2	781.2	21.28	35.54	0	0.262
2022-07-26 16:00:00	10.84	80.16	31.92	372	1.82	140.66	706.8	994.02	748.6	659.8	21.14	38	0	0.23
2022-07-26 17:00:00	10.84	82.56	31.24	96.2	1.9	158.02	181.4	993.8	195.8	193.4	21.04	33.3	0	0.059
2022-07-26 18:00:00	10.84	87.24	30.48	50.2	1.68	155.54	80.2	993.86	101.6	100.4	21.02	31.26	0	0.023
2022-07-26 19:00:00	10.86	89.78	30.18	8.2	1.58	146.48	14.2	995.02	14	13.4	21	30.44	0	0.003
2022-07-26 20:00:00	10.86	89.48	29.84	0	1.18	134.96	0.2	995.82	0.6	0.4	20.98	29.74	0	-0.004
2022-07-26 21:00:00	10.86	91.46	29.26	0	1.08	206.66	0.2	996.54	0.6	0.4	20.94	29.12	0	-0.007
2022-07-26 22:00:00	10.86	94.56	28.88	0	0.82	160.52	0.2	997.16	0.6	0.4	20.92	28.8	0	-0.011
2022-07-26 23:00:00	10.86	96.9	28.42	0	0.6	293.8	0.2	997.46	0.6	0.4	20.92	28.32	0	-0.014
2022-07-27	10.86	96.06	27.84	0	1.36	252.86	0.2	997.64	0.6	0.4	20.9	27.98	0	0	3.37	4	100	77.2	33.4	26.5	0	996.545	425.3	291.5	21.465	31.855
2022-07-27 01:00:00	10.86	94.78	26.6	0	1.22	207.4	0	997.06	0.6	0.4	20.9	26.84	0	0.009
2022-07-27 02:00:00	10.86	97.06	26.26	0	0.6	195.58	0.4	996.12	0.6	0.4	20.88	26.48	0	0.005
2022-07-27 03:00:00	10.86	99.08	26.36	0	0.44	278.96	0.2	995.66	0.6	0.4	20.86	26.7	0	0.003
2022-07-27 04:00:00	10.86	100	26.3	0	0.94	196.36	0.2	995.7	0.6	0.4	20.86	26.76	0	0.003
2022-07-27 05:00:00	10.86	100	26.32	0	1.14	181.86	0.2	995.78	0.6	0.4	20.84	26.74	0	0.003
2022-07-27 06:00:00	10.86	100	26.62	1.8	0.58	170.14	5.6	996.48	4.2	3.6	20.82	26.92	0	0.004
2022-07-27 07:00:00	10.86	99.98	27.02	25.4	0.74	154.3	57.2	996.82	53	52.2	20.82	27.38	0	0.021
2022-07-27 08:00:00	10.86	100	27.3	51.8	0.8	153.66	113	997.22	105.2	104.2	20.8	28.02	0	0.041
2022-07-27 09:00:00	10.86	99.86	27.58	114	0.98	130.16	241	998.02	232.2	230	20.78	28.92	0	0.087
2022-07-27 10:00:00	10.86	99.14	27.86	141.4	0.98	134.1	298.6	998.36	285.6	283	20.76	29.8	0	0.108
2022-07-27 11:00:00	10.86	96.38	28.28	295.2	1.34	167.08	631.2	998.34	600	595.8	20.74	32.08	0	0.207
2022-07-27 12:00:00	10.84	94.42	28.96	489	1.52	226.1	1055	998.04	1017.4	906.8	20.68	34.28	0	0.336
2022-07-27 13:00:00	10.84	89.82	30.36	527	1.12	215.98	1167	997.26	1120.8	970	20.58	37.46	0	0.384
2022-07-27 14:00:00	10.84	86.78	30.94	564	1.1	213.18	1241.4	996.46	1199	892.4	20.46	37.96	0	0.419
2022-07-27 15:00:00	10.84	84.14	31.44	475.6	0.82	166.72	923.2	995.46	1050	643	20.36	37.94	0	0.318
2022-07-27 16:00:00	10.84	77.56	32.5	507.4	0.82	142.38	1207	994.7	1051.4	436.4	20.28	40.5	0	0.35
2022-07-27 17:00:00	10.84	76.46	33.06	371.6	1.04	106.2	894.6	994.38	766	348.2	20.2	40.94	0	0.253
2022-07-27 18:00:00	10.84	83.14	30.42	147.4	1.76	253.68	335.4	994.78	291.4	252.8	20.12	34.78	0	0.085
2022-07-27 19:00:00	10.84	85.94	29.26	30.4	1.04	233.2	64.6	995.38	52.8	50	20.1	30.42	0	0.007
2022-07-27 20:00:00	10.86	87.92	28.82	0	0.8	216.66	0.2	996.72	0.6	0.4	20.1	29.02	0	-0.009
2022-07-27 21:00:00	10.86	89.4	28.5	0	0.28	209.82	0.2	997.46	0.6	0.4	20.12	28.54	0	-0.017
2022-07-27 22:00:00	10.86	91.92	28.1	0	0.8	189.6	0.2	997.9	0.6	0.4	20.14	27.94	0	-0.012
2022-07-27 23:00:00	10.86	95.66	27.62	0	1.22	173.76	0.2	998.26	0.6	0.4	20.16	27.34	0	-0.011
2022-07-28	10.86	98.24	27.54	0	0.28	185.9	0.2	997.98	0.6	0.4	20.18	27.44	0	0	2.6	5	100	74.1	33.5	26.1	0	996.68	326.45	240.5	20.52	30.88
2022-07-28 01:00:00	10.86	99.26	27.56	0	0.26	207.5	0	997.42	0.6	0.4	20.18	27.3	0	0.003
2022-07-28 02:00:00	10.86	99.3	27.38	0	0.46	165.6	0.2	997.1	0.6	0.4	20.18	27.12	0	0.003
2022-07-28 03:00:00	10.86	98.56	27.38	0.2	0.5	217.2	0.2	996.8	0.6	0.4	20.18	27.04	0	0.004
2022-07-28 04:00:00	10.86	99.72	27.26	0	0.34	235.16	0.2	996.78	0.6	0.4	20.18	26.98	0	0.003
2022-07-28 05:00:00	10.86	99.64	27.22	0	0.2	119.66	0.2	997	0.6	0.4	20.2	27.02	0	0.003
2022-07-28 06:00:00	10.86	100	27.04	16.4	0.04	219.4	32.2	997.56	25.4	25	20.2	27.14	0	0.015
2022-07-28 07:00:00	10.86	98.5	27.68	108	0.56	256.1	256.2	998.28	216.8	209.2	20.2	28.68	0	0.085
2022-07-28 08:00:00	10.86	94.4	28.8	260.8	0.98	281.52	630.8	998.64	549	497.2	20.2	32.66	0	0.201
2022-07-28 09:00:00	10.84	89.58	30	459.4	1.06	287.76	1138.2	998.98	994	726.2	20.16	36.02	0	0.349
2022-07-28 10:00:00	10.84	86.9	30.72	533.6	1.22	202.52	1333.6	999.1	1158.6	795.2	20.1	37.14	0	0.403
2022-07-28 11:00:00	10.84	84.32	31.4	526	1.4	232.72	1331.4	998.84	1135.6	972.2	19.98	39	0	0.394
2022-07-28 12:00:00	10.84	81.62	31.88	640	1.38	189.98	1614.8	998.38	1379	1018	19.88	39.7	0	0.488
2022-07-28 13:00:00	10.84	79.3	32.34	572	1.32	135.48	1383.4	997.74	1262.8	1023.8	19.74	39.96	0	0.442
2022-07-28 14:00:00	10.84	85.48	31.82	653	1.9	56.44	1655	996.64	1408.6	958.6	19.6	39.8	0	0.491
2022-07-28 15:00:00	10.84	86.26	31.48	415	2	192.98	1043.2	996.18	882.4	721.8	19.48	37.82	0	0.243
2022-07-28 16:00:00	10.84	94.1	28.58	97.2	1.7	253.52	237.8	996.6	200.2	197.2	19.44	31.42	0	0.039
2022-07-28 17:00:00	10.86	95.22	28.5	142.8	1.28	286.42	339.2	996.14	279.8	269	19.46	31.12	0	0.066
2022-07-28 18:00:00	10.86	94.04	28.88	120.8	0.98	262.56	312.6	995.52	245.6	220.4	19.48	32.24	0	0.056
2022-07-28 19:00:00	10.86	96.86	28.18	17.4	1.48	274.52	48.8	996.34	35.8	33	19.46	29.36	0	-0.004
2022-07-28 20:00:00	10.86	98	27.84	0	0.88	288.72	0.2	997.1	0.6	0.4	19.48	27.86	0	-0.014
2022-07-28 21:00:00	10.86	99.54	27.8	0	0.88	292.32	0.2	998.24	0.6	0.4	19.5	27.74	0	-0.015
2022-07-28 22:00:00	10.86	99.98	27.72	0.2	0.82	281.36	0.2	998.88	0.6	0.4	19.52	27.56	0	-0.015
2022-07-28 23:00:00	10.86	100	27.64	0	0.8	280.98	0.2	998.34	0.6	0.4	19.54	27.46	0	-0.016
2022-07-29	10.86	100	27.48	0	0.94	297.08	0.2	997.7	0.6	0.4	19.56	27.36	0	-0.018	3.21	3	100	76.7	32.7	26.8	0	997.515	407.5	319.6	19.83	31.48
2022-07-29 01:00:00	10.86	100	27.44	0.2	0.8	249.74	0.2	997.44	0.6	0.4	19.56	27.12	0	0.003
2022-07-29 02:00:00	10.86	100	27.16	0	0.28	222.62	0.2	997.14	0.6	0.4	19.58	26.86	0	0.003
2022-07-29 03:00:00	10.86	100	26.98	0	0.42	225.48	0.2	996.68	0.6	0.4	19.6	26.72	0	0.003
2022-07-29 04:00:00	10.86	99.98	26.82	0.2	0.4	269.16	0.2	996.56	0.6	0.4	19.6	26.5	0	0.003
2022-07-29 05:00:00	10.86	100	26.82	0	0.28	220.18	0.4	996.76	0.6	0.4	19.62	26.66	0	0.003
2022-07-29 06:00:00	10.86	100	26.92	15.4	0.2	258.22	33.8	997.14	28.4	27.6	19.64	26.88	0	0.015
2022-07-29 07:00:00	10.86	97.66	28.08	151.2	0.28	211.48	353.4	997.44	331.2	258.2	19.66	30.12	0	0.12
2022-07-29 08:00:00	10.84	92.48	29.12	320.2	0.82	187.54	763.2	997.76	733.8	472.6	19.66	35.24	0	0.247
2022-07-29 09:00:00	10.84	88.74	30.2	510.8	1.2	296.54	1235.8	997.88	1147	634.6	19.62	38.48	0	0.387
2022-07-29 10:00:00	10.84	85.8	30.78	553.8	1.24	217.3	1350	998.02	1246.6	832.4	19.5	38.96	0	0.418
2022-07-29 11:00:00	10.84	83.2	31.7	595.8	1.32	197.7	1461	997.84	1327.6	958.6	19.38	40.84	0	0.451
2022-07-29 12:00:00	10.84	81.76	32	715.6	1.48	218.7	1475	997.08	1581	929.4	19.22	39.7	0	0.547
2022-07-29 13:00:00	10.84	79.76	32.62	683	1.6	221.88	1193.8	996.14	1502	904	19.08	40.44	0	0.53
2022-07-29 14:00:00	10.84	76.6	33.34	747.8	1.62	148.58	1574.6	995.08	1713.2	942	18.92	42.04	0	0.59
2022-07-29 15:00:00	10.84	89.62	30.8	64.4	2.14	188.1	157.4	995.06	139	134.4	19.62	33.26	4.8	0.033
2022-07-29 16:00:00	10.86	100	27.34	40.2	1.4	188.7	99.2	994.86	91.8	90.8	21.46	28.54	7.6	-0.001
2022-07-29 17:00:00	10.86	100	27.46	116.6	1.16	255.9	259.6	993.7	236.4	234.2	21.6	29.02	1	0.045
2022-07-29 18:00:00	10.86	99.84	28.12	97.4	1.36	256.76	235.2	993.72	202.4	191	21.7	29.96	0	0.034
2022-07-29 19:00:00	10.86	99.98	28.22	14.6	0.8	260.48	34.4	994.78	28	27.2	21.76	29.1	0	-0.009
2022-07-29 20:00:00	10.86	99.98	28.12	0	0.4	205.14	0.2	995.68	0.6	0.4	21.82	28.5	0	-0.016
2022-07-29 21:00:00	10.86	100	28.16	0	0.48	170.8	0.2	996.38	0.6	0.4	21.86	28.4	0	-0.016
2022-07-29 22:00:00	10.86	100	28.14	0	0.56	188.44	0.2	996.68	0.6	0.4	21.88	28.36	0	-0.016
2022-07-29 23:00:00	10.86	100	27.98	0	0.24	204.62	0.2	996.66	0.6	0.4	21.78	28.22	0	-0.017
2022-07-30	10.86	99.98	27.9	0	0.1	245.24	0.2	996.44	0.6	0.4	21.54	28.14	0	-0.018	3.34	6	100	73	33.5	26.7	13.4	996.37	429.75	276.7	20.32	31.585
2022-07-30 01:00:00	10.86	100	27.8	0	0.36	210.12	0.2	996.26	0.6	0.4	21.44	28.16	0	0.003
2022-07-30 02:00:00	10.86	99.98	27.72	0	0.82	278.38	0.2	995.72	0.6	0.4	21.38	28.16	0	0.003
2022-07-30 03:00:00	10.86	100	27.54	0.2	0.62	280.9	0.2	995.26	0.6	0.4	21.32	27.86	0	0.003
2022-07-30 04:00:00	10.86	100	27.26	0	0.54	256.02	0.2	995.1	0.6	0.4	21.28	27.6	0	0.003
2022-07-30 05:00:00	10.86	100	27.3	0	0.4	248.26	0.2	995	0.6	0.4	21.26	27.56	0.2	0.003
2022-07-30 06:00:00	10.86	100	27.2	13.8	0.36	171.2	28.4	995.2	25.4	24.8	21.28	27.34	0	0.013
2022-07-30 07:00:00	10.86	99.98	27.6	113.8	0.6	250.34	240.2	995.52	223.4	219.6	21.26	28.48	0	0.088
2022-07-30 08:00:00	10.86	99.98	28.08	118.8	1.02	258.68	267.4	995.98	241.2	238.6	21.2	29.74	0	0.091
2022-07-30 09:00:00	10.86	99.86	28.46	208.2	1.18	253.94	483.6	996.44	434	430.4	21.16	30.88	0	0.155
2022-07-30 10:00:00	10.84	97.14	29.2	348	1.4	296.48	828	996.54	745.4	738.8	21.1	33.82	0	0.252
2022-07-30 11:00:00	10.84	92.88	30.04	571.4	1.78	295.18	1347	996.24	1251.8	1042.2	21.02	36.52	0	0.405
2022-07-30 12:00:00	10.84	90.18	30.7	568.6	1.94	298.22	1363.6	995.8	1258.6	920.2	20.9	37.54	0	0.411
2022-07-30 13:00:00	10.84	85.84	31.66	746.2	1.88	297.6	1811.2	994.78	1650.6	988.6	20.72	40.64	0	0.559
2022-07-30 14:00:00	10.84	85.08	32	542.2	2	271.54	1327.6	993.76	1198	847	20.54	39.62	0	0.41
2022-07-30 15:00:00	10.84	83.2	32.44	547.4	2.12	292.24	1368.2	992.72	1235.8	797.2	20.42	39.92	0	0.328
2022-07-30 16:00:00	10.84	81.14	32.62	377.4	2.22	252.24	938.8	992.1	800	635.6	20.32	39.54	0	0.231
2022-07-30 17:00:00	10.84	91.92	31	247	2.1	220.88	539.4	991.88	486.2	416	20.72	34.06	1.6	0.134
2022-07-30 18:00:00	10.84	92.14	29.86	88.4	2.06	280.26	203	992.18	174.6	171	20.88	31.86	0	0.04
2022-07-30 19:00:00	10.86	93.58	29.38	16	1.02	304.44	36.4	992.48	30	29.4	20.74	30.04	0	-0.003
2022-07-30 20:00:00	10.86	95.92	29.3	0	0.84	297.48	0.2	993.14	0.6	0.4	20.68	29.4	0	-0.011
2022-07-30 21:00:00	10.86	94.9	29.34	0	1.04	267.12	0.4	993.58	0.6	0.4	20.64	29.24	0	-0.009
2022-07-30 22:00:00	10.86	95.84	29.16	0	1.38	251.4	0.2	993.78	0.6	0.4	20.62	28.92	0	-0.008
2022-07-30 23:00:00	10.86	96.36	28.68	0	1.48	270.66	0.2	994.22	0.6	0.4	20.58	28.48	0	-0.009
2022-07-31	10.86	98.7	28.06	0.2	1.4	290.04	0.2	994.06	0.6	0.4	20.56	27.84	0	-0.015	3.08	2	100	78.4	32.9	27.2	1.8	994.49	406.7	312.65	20.92	31.8
2022-07-31 01:00:00	10.86	100	27.62	0	1.08	295.16	0.4	993.3	0.6	0.4	20.56	27.4	0	0.003
2022-07-31 02:00:00	10.86	100	27.3	0	0.94	278.84	0.2	992.78	0.6	0.4	20.54	27.2	0	0.003
2022-07-31 03:00:00	10.86	99.54	27	0	1.14	280.36	0.2	992.66	0.6	0.4	20.54	26.86	0	0.003
2022-07-31 04:00:00	10.86	99.98	26.88	0	0.86	293.94	0.2	992.44	0.6	0.4	20.52	26.74	0	0.003
2022-07-31 05:00:00	10.86	100	26.86	0	0.64	279.36	0.4	992.34	0.6	0.4	20.52	26.78	0	0.003
2022-07-31 06:00:00	10.86	99.98	26.92	8.2	0.58	293.08	19	992.42	15.4	14.8	20.52	26.94	0	0.009
2022-07-31 07:00:00	10.86	100	27.26	58.4	0.82	284.64	134.6	993.1	116.2	115	20.52	27.88	0	0.046
2022-07-31 08:00:00	10.86	99.82	27.86	131	1.1	302.98	305.8	993.58	267.8	263	20.5	29.4	0	0.099
2022-07-31 09:00:00	10.86	94.18	29.22	480	1.64	329.9	1137.2	993.72	1030.8	757.4	20.48	34.9	0	0.348
2022-07-31 10:00:00	10.84	87.9	30.62	541.6	2.2	249.62	1327	993.96	1201.4	907.2	20.38	38.5	0	0.4
2022-07-31 11:00:00	10.84	86.16	31.1	559.2	2.24	272.52	1367.4	993.94	1219.2	1065.6	20.26	37.8	0	0.412
2022-07-31 12:00:00	10.84	87.42	31.6	538	2.06	204.88	1334	993.38	1165.6	1055.4	20.14	38.7	0	0.4
2022-07-31 13:00:00	10.84	83.84	32.28	674.6	2.3	222.92	1645.4	992.54	1466.6	930.6	20	39.24	0	0.512
2022-07-31 14:00:00	10.84	79.12	32.7	700.8	2.64	220.54	1759.4	991.76	1581.6	965.6	19.86	40.9	0	0.544
2022-07-31 15:00:00	10.84	78.58	32.68	553	2.26	121.5	1394.4	990.54	1233.2	730.4	19.68	40.02	0	0.336
2022-07-31 16:00:00	10.84	77.18	32.68	385.2	1.78	268.46	971	989.94	808.8	657.2	19.6	38.36	0	0.247
2022-07-31 17:00:00	10.84	71.68	32.92	262	1.92	212.28	617.8	990.1	548	465.6	19.54	37.14	0	0.178
2022-07-31 18:00:00	10.84	75.88	32.08	82.2	1.36	297.32	195.8	990.2	164.4	162.8	19.52	33.38	0	0.053
2022-07-31 19:00:00	10.84	84.6	31.5	12.8	0.52	268.5	28.4	990.72	22.2	21.8	19.52	31.34	0	-0.003
2022-07-31 20:00:00	10.86	89.5	31.12	0	0.26	268.02	0.2	991.76	0.6	0.4	19.56	30.5	0	-0.013
2022-07-31 21:00:00	10.86	94.68	30.62	0	0.08	183.6	0.2	992.54	0.6	0.4	19.58	30.12	0	-0.015
2022-07-31 22:00:00	10.86	93.14	28.92	0	2.02	50.24	0.2	993.38	0.6	0.4	19.58	29.24	0	-0.002
2022-07-31 23:00:00	10.86	97.1	27.38	0	1	226.42	0.2	993.26	0.6	0.4	19.58	27.88	0	-0.014

## Sheet: Table S5 April 2023
Label	Power.Avg1	RH.Avg1	AirTemp.Avg1	Rad'n.Avg1	Speed.Avg1	Dir.Avg1	PAR QUANTUM.Avg1	Pressure.Avg1	Total Rad.Avg1	Diffused Rad.Avg1	SOIL MOISTURE.Avg1	SoilTemp.Avg1	Rain.Tot2	ET (P-M)#@1h/10m	ET (P-M).Tot3@1d	Sunshine.Tot5	RH.Max4	RH.Min4	AirTemp.Max4	AirTemp.Min4	Rain.Tot6	Pressure.Avg7	Total Rad.Avg7	Diffused Rad.Avg7	SOIL MOISTURE.Avg7	SoilTemp.Avg7
Units	V	%	deg C	W.m-2	m.s-1	deg	umol.m-2.s-1	hPa	umol.m-2.s-1	umol.m-2.s-1	%	deg C	mm	mm	mm	no sun~sun	%	%	deg C	deg C	mm	hPa	umol.m-2.s-1	umol.m-2.s-1	%	deg C
2023-04-01 01:00:00	10.86	99.98	19.68	0	0.72	256.3	0	999.56	0.6	1	16.74	19.08	0	-0.005
2023-04-01 02:00:00	10.86	100	18.98	0	0.32	154.26	0	998.92	0.6	1	16.68	18.46	0	-0.006
2023-04-01 03:00:00	10.86	100	18.9	0	0.84	94.16	0.2	999.1	0.6	1	16.62	18.52	0	-0.005
2023-04-01 04:00:00	10.86	100	19.1	0	1.46	104.64	0.2	999.54	0.6	1	16.58	18.58	0	-0.005
2023-04-01 05:00:00	10.86	100	19.02	0	0.98	91.64	0	999.58	0.6	1	16.52	18.38	0	-0.005
2023-04-01 06:00:00	10.86	99.98	18.54	1.6	1.2	22.32	3.6	1000.82	3	3.4	16.48	18.32	0	-0.004
2023-04-01 07:00:00	10.86	99.98	18.72	87	1.42	109.1	175.8	1002	160.6	152.2	16.46	19.46	0	0.009
2023-04-01 08:00:00	10.86	100	21.02	276.6	1.48	123.1	561.6	1001.3	532.8	378.4	16.44	23.58	0	0.134
2023-04-01 09:00:00	10.86	99.98	22.46	303.2	1.54	109.4	648.8	1002.3	588.6	510	16.42	25.56	0	0.173
2023-04-01 10:00:00	10.86	100	21.62	175.4	2	91.84	371.8	1003.42	347.8	344	16.36	23.16	0.2	0.108
2023-04-01 11:00:00	10.86	99.12	22.38	710.4	2.26	69.82	1469.2	1002.6	1399.8	924.8	16.38	27.58	0	0.412
2023-04-01 12:00:00	10.86	89.28	23.76	462.8	2.7	140.26	1000.2	1001.24	909.4	724.2	16.32	28.22	0	0.301
2023-04-01 13:00:00	10.86	75.36	25.06	663	1.68	126.02	1325.6	1000.52	1285.2	788.6	16.24	30.42	0	0.462
2023-04-01 14:00:00	10.84	66.24	27.12	796	1.22	138.24	1704.2	999.34	1591.4	630.8	16.18	33.66	0	0.574
2023-04-01 15:00:00	10.84	60.4	28.38	625.4	1.44	78.58	1338	998.14	1329	489.4	16.1	34.62	0	0.477
2023-04-01 16:00:00	10.84	59.4	28.9	477.6	1.42	64.02	1033	997.32	919	495.4	16	33.82	0	0.376
2023-04-01 17:00:00	10.84	62.08	28.68	243.6	1.5	103.76	535.4	997.02	459.8	314.6	15.88	31.04	0	0.216
2023-04-01 18:00:00	10.84	63.16	27.86	71	1.4	71.52	181	997.44	146.2	119.4	15.8	27.82	0	0.099
2023-04-01 19:00:00	10.86	74.64	25.66	2.2	0.44	105.42	5.6	997.82	4.2	3.8	15.72	23.4	0	0.018
2023-04-01 20:00:00	10.86	99.26	22.9	0	0	140.78	0.2	998.5	0.6	0.4	15.68	21.84	0	-0.016
2023-04-01 21:00:00	10.86	99.98	21.74	0	0.04	175.98	0	999.18	0.6	0.8	15.66	21.16	0	-0.016
2023-04-01 22:00:00	10.86	99.98	21.7	0	0.16	201.94	0	999.68	0.6	0.8	15.66	20.7	0	-0.016
2023-04-01 23:00:00	10.86	99.98	20.8	0	0	172.32	0	999.76	0.6	1.2	15.64	20.16	0	-0.017
2023-04-02	10.86	99.98	20.42	0	0	145.48	0	999.62	0.6	1	15.64	19.76	0	-0.017	3.25	6	100	58.2	29.2	18.2	0.2	999.78	403.45	245.35	16.175	24.055
2023-04-02 01:00:00	10.86	99.98	20.2	0	0	179.92	0	999.46	0.6	1.2	15.62	19.5	0	-0.017
2023-04-02 02:00:00	10.86	100	19.98	0	0	232.26	0	999.04	0.6	1.2	15.62	19.22	0	-0.017
2023-04-02 03:00:00	10.86	99.98	19.68	0	0	143.92	0	998.64	0.6	1	15.6	19.02	0	-0.017
2023-04-02 04:00:00	10.86	100	19.56	0	0	227.9	0	998.32	0.6	1.2	15.6	19.04	0	-0.017
2023-04-02 05:00:00	10.86	99.98	19.66	0	0.26	276.06	0	998.2	0.6	1	15.6	18.86	0	-0.016
2023-04-02 06:00:00	10.86	99.98	19.58	2.4	0.1	243.18	5	998.54	4.4	5	15.6	18.46	0	-0.016
2023-04-02 07:00:00	10.86	99.98	20.02	73.8	0.4	279.34	156.4	999.14	158.8	130.4	15.6	20.16	0	0.004
2023-04-02 08:00:00	10.86	99.98	22.5	283	0.98	295.78	573.6	999.76	562.8	328.8	15.62	25.06	0	0.15
2023-04-02 09:00:00	10.86	89.12	25.08	500	1.4	327.26	1055.4	1000.28	992	434.8	15.64	29.64	0	0.319
2023-04-02 10:00:00	10.86	69.56	27.44	681.6	1.74	262.14	1433.8	1000.34	1371.4	530.8	15.64	32.24	0	0.486
2023-04-02 11:00:00	10.84	61.02	28.68	808.8	2.14	274	1667.2	1000.3	1605	616.6	15.6	33.28	0	0.603
2023-04-02 12:00:00	10.84	53.98	29.74	972.6	2.48	317.34	2025	999.8	1915	718.6	15.56	34.62	0	0.747
2023-04-02 13:00:00	10.84	50.04	30.32	864.6	2.54	212.4	1796.4	999	1707	735.8	15.5	35.4	0	0.694
2023-04-02 14:00:00	10.84	44.62	30.76	772.2	2.66	218.94	1643.8	998.06	1522.2	593.8	15.44	35.42	0	0.652
2023-04-02 15:00:00	10.84	40.28	31.4	598.6	2.94	265.76	1316.8	997.12	1203.2	444	15.38	36.3	0	0.564
2023-04-02 16:00:00	10.84	35.7	31.58	527.6	2.84	217.56	1150	996.48	1042.2	399.6	15.32	35.74	0	0.515
2023-04-02 17:00:00	10.84	35.68	31.4	297.4	2.64	194.2	632.2	996.34	546.2	291	15.24	33.98	0	0.352
2023-04-02 18:00:00	10.84	36.98	30.42	71	1.84	266.9	180.6	996.42	145.4	116	15.14	29.8	0	0.169
2023-04-02 19:00:00	10.86	42.26	28.52	2.4	0.98	264.5	5.8	996.7	4.2	4	15.04	24.82	0	0.068
2023-04-02 20:00:00	10.86	49.7	26.82	0	0.42	270.74	0	997.1	0.6	0.4	14.98	22.06	0	-0.005
2023-04-02 21:00:00	10.86	75.78	23	0	0	160.2	0.2	997.78	0.6	0.6	14.94	20.74	0	-0.022
2023-04-02 22:00:00	10.86	88.2	21.64	0	0.14	118.56	0	998.1	0.6	0.8	14.9	20.16	0	-0.018
2023-04-02 23:00:00	10.86	95.1	21.02	0	0.04	151.7	0	997.84	0.6	1	14.88	19.74	0	-0.019
2023-04-03	10.86	92.94	20.82	0	0	203.74	0.2	997.4	0.6	1	14.86	19.36	0	-0.02	5.14	11	100	34.1	31.7	19.1	0	998.34	532.7	223.3	15.37	25.945
2023-04-03 01:00:00	10.86	85.82	21.14	0	0.24	219.46	0	997.12	0.6	1.2	14.84	19.08	0	-0.016
2023-04-03 02:00:00	10.86	92.3	20.3	0	0	150.92	0.2	996.66	0.6	1	14.84	18.78	0	-0.02
2023-04-03 03:00:00	10.86	99.98	19.6	0	0.14	154.58	0	996.36	0.6	1	14.82	18.44	0	-0.018
2023-04-03 04:00:00	10.86	100	19.74	0	0.2	212.88	0.2	996.52	0.6	1	14.82	18.18	0	-0.018
2023-04-03 05:00:00	10.86	99.98	19.56	0	0.04	155.48	0.2	996.8	0.6	1.2	14.82	17.9	0	-0.019
2023-04-03 06:00:00	10.86	100	18.6	2.4	0.06	159.08	6.4	997.38	4.6	5.2	14.8	17.56	0	-0.018
2023-04-03 07:00:00	10.86	100	19.9	75.8	0.2	198.32	182.8	998.06	170.8	121.8	14.82	19.62	0	0.005
2023-04-03 08:00:00	10.86	78.48	23.38	297.4	1.14	291.78	623	998.8	607.6	274.2	14.86	25.56	0	0.176
2023-04-03 09:00:00	10.86	64.34	26.56	520.4	1.5	296.34	1105.4	999.36	1053	343.4	14.9	30.4	0	0.366
2023-04-03 10:00:00	10.86	55.66	29	703.2	1.64	282.72	1493.4	999.5	1443	408.6	14.92	33.76	0	0.53
2023-04-03 11:00:00	10.84	48.76	30.8	843.2	2.14	312.22	1773.8	999.4	1743.2	460.6	14.94	35.94	0	0.67
2023-04-03 12:00:00	10.84	43.1	31.94	911.2	2.3	265.8	1891	998.92	1808.4	464	14.94	37.66	0	0.747
2023-04-03 13:00:00	10.84	38	33.02	915	2.62	218.74	1913.2	998.14	1845.8	453.2	14.96	39.12	0	0.786
2023-04-03 14:00:00	10.84	34.88	33.86	830.8	2.64	277.52	1775.8	997.36	1681.8	428.4	14.94	40.08	0	0.746
2023-04-03 15:00:00	10.84	31.14	34.34	690.8	2.7	215.72	1510.4	996.64	1384.6	423.4	14.92	40.26	0	0.662
2023-04-03 16:00:00	10.84	29.24	34.62	497.6	2.48	108.84	1100.6	996.24	1004.6	383.2	14.88	39.68	0	0.52
2023-04-03 17:00:00	10.84	29.04	34.26	284	2.28	225.9	625.6	996.2	545	255.8	14.8	37.24	0	0.357
2023-04-03 18:00:00	10.84	32.74	33.2	72.6	1.18	181.86	182.8	996.22	147.8	113.8	14.7	32.46	0	0.141
2023-04-03 19:00:00	10.84	47.42	29.46	2.4	0.32	96.68	5.8	996.72	4.4	4	14.6	25.58	0	0.026
2023-04-03 20:00:00	10.86	66.16	25.32	0	0.04	240	0.2	997.22	0.6	0.4	14.52	23.38	0	-0.02
2023-04-03 21:00:00	10.86	72.92	24.2	0.2	0.22	183.28	0.2	997.86	0.6	0.4	14.48	22.34	0	-0.014
2023-04-03 22:00:00	10.86	77.8	23.2	0	0	142.2	0	998.3	0.6	0.6	14.44	21.68	0	-0.02
2023-04-03 23:00:00	10.86	94.16	22.56	0	0	161.34	0	998.22	0.6	0.4	14.4	21.18	0	-0.017
2023-04-04	10.86	99.98	22.14	0	0.04	132.46	0	998.02	0.6	1	14.38	20.72	0	-0.016	5.54	11	100	27.2	34.8	18.4	0	997.585	560.45	172.85	14.76	27.36
2023-04-04 01:00:00	10.86	95.54	21.86	0	0	130.68	0	997.5	0.6	0.8	14.34	20.36	0	-0.017
2023-04-04 02:00:00	10.86	96.62	21.98	0	0.14	202.32	0	997.16	0.6	0.6	14.34	20.86	0	-0.016
2023-04-04 03:00:00	10.86	82.42	22.84	0	0.06	191.88	0	996.76	0.6	0.4	14.34	21.2	0	-0.018
2023-04-04 04:00:00	10.86	75.6	23.18	0	0.18	175.06	0	996.66	0.6	0.4	14.32	20.5	0	-0.015
2023-04-04 05:00:00	10.86	91.12	21.22	0	0	165.56	0	996.94	0.6	1	14.3	19.6	0	-0.018
2023-04-04 06:00:00	10.86	100	20.44	2.8	0	134.64	6.4	997.34	5	5.6	14.28	19.28	0	-0.016
2023-04-04 07:00:00	10.86	97.4	22.1	77	0	166.92	177.6	997.98	163	130.2	14.3	21.26	0	0.009
2023-04-04 08:00:00	10.86	66.18	27.12	280.6	0.4	116.46	590.2	998.52	567.8	297.8	14.34	27.9	0	0.171
2023-04-04 09:00:00	10.84	50.4	30.16	463.6	0.8	216.14	1031.2	998.86	977.2	412.4	14.38	33.4	0	0.338
2023-04-04 10:00:00	10.84	39.32	33.1	673.8	1.3	220.72	1437.8	999.04	1379	480.6	14.44	36.88	0	0.545
2023-04-04 11:00:00	10.84	33.34	34.74	816	1.58	208.56	1722	998.72	1691	516	14.5	39.34	0	0.689
2023-04-04 12:00:00	10.84	30.82	35.56	896.6	1.82	257.18	1876.6	998.14	1796.8	508.2	14.54	41.26	0	0.777
2023-04-04 13:00:00	10.84	29.64	36.14	890.2	2.16	222.82	1871	997.5	1796.4	544.4	14.56	42.36	0	0.803
2023-04-04 14:00:00	10.84	29	36.36	722.2	2.3	308.3	1554.8	996.62	1452.8	555.4	14.56	42.34	0	0.698
2023-04-04 15:00:00	10.84	28.36	36.68	602	2.42	259.04	1330	995.78	1209.6	504.2	14.52	42.12	0	0.619
2023-04-04 16:00:00	10.84	28.92	36.2	289.2	2.56	165.5	674.4	995.5	602	402.2	14.46	39.64	0	0.413
2023-04-04 17:00:00	10.84	32.5	35.3	245.6	2.24	69.36	521.8	995.4	452.4	306.2	14.38	37.14	0	0.333
2023-04-04 18:00:00	10.84	39.56	33.42	65.4	2.04	127.62	148.8	995.94	124	114.2	14.3	33.3	0	0.184
2023-04-04 19:00:00	10.84	45.54	31.34	2.2	0.94	178.82	5.4	996.78	4.2	4	14.2	28.76	0	0.065
2023-04-04 20:00:00	10.86	48.4	30.24	0	0.74	218.7	0	997.7	0.6	0.4	14.14	26.38	0	0.031
2023-04-04 21:00:00	10.86	50.44	29.32	0	1.14	229.74	0	998.58	0.6	0.4	14.08	26.26	0	0.045
2023-04-04 22:00:00	10.86	54.56	27.98	0	0.9	127.32	0	999.42	0.6	0.4	14.04	25.4	0	0.031
2023-04-04 23:00:00	10.86	58.14	26.84	0	0.48	22.1	0.2	999.6	0.6	0.4	14	23.96	0	0.013
2023-04-05	10.86	59.36	25.84	0	0.56	231.42	0.2	999.46	0.6	0.4	13.96	22.28	0	0.014	5.68	9	100	27.5	36.8	20.2	0	997.58	509.45	199.45	14.315	29.655
2023-04-05 01:00:00	10.86	60.64	25.12	0	0.74	77.4	0	998.94	0.6	0.4	13.94	21.86	0	0.019
2023-04-05 02:00:00	10.86	62.26	24.68	0	0.9	222.8	0.2	998.66	0.6	0.4	13.92	21.78	0	0.022
2023-04-05 03:00:00	10.86	66.5	23.72	0	0.8	226.04	0	998.26	0.6	0.4	13.88	20.64	0	0.016
2023-04-05 04:00:00	10.86	74.94	22.22	0	0.38	214	0	998.18	0.6	0.6	13.86	19	0	0.002
2023-04-05 05:00:00	10.86	79.16	21.56	0	0.46	204.3	0	998.54	0.6	0.8	13.84	18.54	0	0.002
2023-04-05 06:00:00	10.86	76.62	21.76	3.4	0.84	302.5	8	999.2	6.2	5.8	13.82	19.06	0	0.011
2023-04-05 07:00:00	10.86	80.92	21.78	84.2	0.64	251	197.6	1000.04	185.2	127.4	13.82	21.52	0	0.017
2023-04-05 08:00:00	10.86	73.64	23.84	295.8	1.2	295.82	613.4	1000.58	596.8	292.2	13.86	27.16	0	0.181
2023-04-05 09:00:00	10.86	63.56	26.86	512.2	1.32	257.88	1064.2	1001.14	999.4	388.6	13.9	32.02	0	0.36
2023-04-05 10:00:00	10.84	53.66	29.52	710	1.52	249.72	1474.4	1001.22	1404.4	444.8	13.98	35.76	0	0.539
2023-04-05 11:00:00	10.84	45.22	31.16	853.4	2.08	305.94	1751.2	1001.06	1696.6	487.8	14.04	37.88	0	0.685
2023-04-05 12:00:00	10.84	38.06	32.26	928.8	2.26	322.36	1884.6	1000.52	1781.4	491.6	14.08	39.44	0	0.77
2023-04-05 13:00:00	10.84	30.86	33.38	922	2.6	256.6	1883.8	999.6	1791	508.6	14.12	40.48	0	0.808
2023-04-05 14:00:00	10.84	26.9	34.08	825.8	2.5	284.08	1723.8	998.52	1600	486.8	14.12	41.22	0	0.754
2023-04-05 15:00:00	10.84	24.46	34.64	674.2	2.86	179.3	1436	997.66	1301.6	439.6	14.1	40.86	0	0.679
2023-04-05 16:00:00	10.84	24.06	34.64	487.2	2.92	172.26	1049.2	997.26	944.2	399.6	14.06	39.66	0	0.553
2023-04-05 17:00:00	10.84	24.9	34.18	278.6	2.7	270.06	600.2	997.18	519	268	14	37.3	0	0.391
2023-04-05 18:00:00	10.84	26.16	32.96	73.6	1.92	75.3	176.4	997.44	143.2	113.8	13.9	32.84	0	0.205
2023-04-05 19:00:00	10.84	34.54	30.26	2.6	0.58	121.5	6.2	998.18	4.8	4.6	13.8	26.42	0	0.051
2023-04-05 20:00:00	10.86	42.42	27.18	0	0.34	61.5	0.2	999.02	0.6	0.4	13.72	23.16	0	-0.004
2023-04-05 21:00:00	10.86	34.74	28.48	0	0.64	202.58	0.2	999.62	0.6	0.4	13.68	22.96	0	0.015
2023-04-05 22:00:00	10.86	55.36	24.4	0	0.26	178.18	0	1000.22	0.6	0.4	13.62	21.12	0	-0.011
2023-04-05 23:00:00	10.86	65.16	22.14	0	0.14	139.44	0	1000.46	0.6	0.8	13.58	20	0	-0.016
2023-04-06	10.86	66.32	21.68	0	0.16	140.2	0	1000.42	0.6	1.2	13.54	19.44	0	-0.015	6.03	11	84.6	22.4	34.9	20.9	0	999.245	540.8	186.05	13.88	28.34
2023-04-06 01:00:00	10.86	69.6	21.36	0	0.1	129.9	0	1000.22	0.6	1.2	13.52	18.94	0	-0.017
2023-04-06 02:00:00	10.86	73.82	20.4	0	0.04	164.96	0.2	999.96	0.6	1.2	13.5	18.6	0	-0.019
2023-04-06 03:00:00	10.86	80.16	19.62	0	0	111.76	0.2	999.88	0.6	1	13.48	18.26	0	-0.019
2023-04-06 04:00:00	10.86	82.92	19.26	0	0.1	161.2	0.2	999.84	0.6	1	13.46	17.82	0	-0.017
2023-04-06 05:00:00	10.86	88.94	18.76	0	0.04	164.58	0.2	1000.24	0.6	1	13.44	17.46	0	-0.017
2023-04-06 06:00:00	10.86	89.18	18.64	3.8	0.26	177.16	8.6	1000.98	6.6	7	13.42	17.18	0	-0.013
2023-04-06 07:00:00	10.86	70.26	21.54	83.4	0.52	271.58	191.2	1001.84	175.8	132.2	13.42	19.82	0	0.014
2023-04-06 08:00:00	10.86	58.56	24.4	287.8	0.8	253.98	596	1002.58	572.6	318	13.46	26.76	0	0.175
2023-04-06 09:00:00	10.86	44.76	27.64	504	0.9	296.12	1045	1003.24	975.4	458.6	13.52	32.12	0	0.355
2023-04-06 10:00:00	10.84	33.7	30.26	698.4	1.24	91.76	1448.8	1003.46	1363.8	537.2	13.6	35.88	0	0.538
2023-04-06 11:00:00	10.84	30.48	31.86	820.6	1.24	205.06	1691.6	1003.42	1614	603.8	13.68	38.88	0	0.649
2023-04-06 12:00:00	10.84	29.54	32.82	881.2	1.8	176.2	1791.8	1003.18	1671.8	608.2	13.74	40.14	0	0.738
2023-04-06 13:00:00	10.84	27	33.74	896	1.52	203.86	1837.4	1002.2	1733.4	581.4	13.78	41.68	0	0.75
2023-04-06 14:00:00	10.84	27.88	34.34	807.6	1.58	217.74	1692	1001.12	1520.4	517.8	13.78	42.5	0	0.697
2023-04-06 15:00:00	10.84	28.24	34.9	656.2	1.94	164.3	1399.2	1000.28	1258	449	13.78	42	0	0.611
2023-04-06 16:00:00	10.84	25.46	35.26	484.4	2.14	250.3	1045.2	999.48	934.2	379.8	13.74	40.84	0	0.504
2023-04-06 17:00:00	10.84	24.68	35	263.2	1.8	226.44	562.8	999.26	481.8	269.2	13.66	38.14	0	0.326
2023-04-06 18:00:00	10.84	26.44	34.04	74	1.12	177.26	177.6	999.3	143	115.2	13.58	33.62	0	0.148
2023-04-06 19:00:00	10.84	40.72	29.68	2.6	0.14	132.48	6.2	999.74	4.8	4.6	13.46	25.82	0	0.018
2023-04-06 20:00:00	10.86	55.94	26.1	0	0.04	191.84	0	1000.74	0.6	0.4	13.38	23.42	0	-0.02
2023-04-06 21:00:00	10.86	67.94	24.32	0	0	135.1	0	1001.66	0.6	0.4	13.34	22.26	0	-0.02
2023-04-06 22:00:00	10.86	70.22	23.16	0	0.04	132.84	0	1002.3	0.6	0.4	13.28	21.46	0	-0.019
2023-04-06 23:00:00	10.86	69.08	22.68	0	0	129.24	0	1002.5	0.6	0.4	13.24	20.82	0	-0.021
2023-04-07	10.86	74.12	22.26	0	0	174.42	0	1002.56	0.6	0.6	13.22	20.22	0	-0.02	5.32	11	93.6	23.8	35.6	18.5	0	1001.25	519.2	207.9	13.52	28.11
2023-04-07 01:00:00	10.86	73.94	21.56	0	0.14	124.1	0	1002.36	0.6	0.8	13.18	19.7	0	-0.016
2023-04-07 02:00:00	10.86	72.42	21.32	0	0.1	151.86	0	1002.12	0.6	1.2	13.16	19.38	0	-0.017
2023-04-07 03:00:00	10.86	73.32	20.84	0	0.3	193.06	0	1001.82	0.6	1	13.14	18.86	0	-0.011
2023-04-07 04:00:00	10.86	68.28	21.28	0	0.26	188.96	0.2	1001.58	0.6	1.2	13.12	18.54	0	-0.012
2023-04-07 05:00:00	10.86	72.98	20.6	0	0.2	167.34	0	1001.92	0.6	1.2	13.1	18.14	0	-0.014
2023-04-07 06:00:00	10.86	74.6	19.84	4	0.12	181.88	9.2	1002.82	6.8	7.4	13.08	17.84	0	-0.015
2023-04-07 07:00:00	10.86	79	20.88	91	0.14	203.18	202.4	1003.74	182.4	146	13.08	20.56	0	0.011
2023-04-07 08:00:00	10.86	61.02	24.22	227.4	0.72	276.7	479.8	1004.56	446.8	307.8	13.12	25.9	0	0.129
2023-04-07 09:00:00	10.86	51.8	26.96	478.2	0.88	239.26	989.8	1005.34	919.4	433.2	13.18	31.8	0	0.33
2023-04-07 10:00:00	10.84	41.78	30.18	676	1.04	186.66	1395	1005.66	1307	513.8	13.26	36.16	0	0.51
2023-04-07 11:00:00	10.84	33.58	32.2	817.4	1.22	144.48	1681	1005.42	1593.6	570.8	13.34	39.08	0	0.649
2023-04-07 12:00:00	10.84	30.54	33.9	924.2	1.34	189.54	1882.6	1004.96	1747.8	634.4	13.42	41.38	0	0.757
2023-04-07 13:00:00	10.84	28.82	34.42	708.4	1.8	269.74	1468	1004.12	1355.8	604.6	13.46	41.66	0	0.645
2023-04-07 14:00:00	10.84	26.12	34.76	793.8	2.22	328.08	1659.4	1003.26	1469.8	547.2	13.46	42.04	0	0.729
2023-04-07 15:00:00	10.84	24.3	35.26	701.4	2.4	126.54	1493	1002.32	1334.8	505	13.44	41.78	0	0.676
2023-04-07 16:00:00	10.84	23.7	35.28	492.6	2.04	166.76	1059.8	1001.64	937.4	420.6	13.4	40.78	0	0.505
2023-04-07 17:00:00	10.84	23.52	34.76	270	1.94	229.08	577.6	1001.12	491.4	276.6	13.32	37.76	0	0.34
2023-04-07 18:00:00	10.84	25.84	33.78	78	1.14	204.28	174.8	1001.24	141	116.6	13.22	33.22	0	0.151
2023-04-07 19:00:00	10.84	47.06	29.18	3.8	0.16	130.04	7.4	1001.96	5.6	5.2	13.12	26.48	0	0.018
2023-04-07 20:00:00	10.86	54.7	25.98	0	0.04	122.24	0.2	1002.76	0.6	0.4	13.04	23.76	0	-0.021
2023-04-07 21:00:00	10.86	63.92	24.78	0	0.04	134.6	0	1003.4	0.6	0.4	13	22.68	0	-0.019
2023-04-07 22:00:00	10.86	68.1	24.14	0	0	122.36	0.2	1003.98	0.6	0.4	12.96	22.58	0	-0.021
2023-04-07 23:00:00	10.86	69.32	23.74	0	0	107.9	0.2	1004.18	0.6	0.4	12.92	22.36	0	-0.021
2023-04-08	10.86	74.66	23.14	0	0	118.86	0	1003.92	0.6	0.4	12.9	21.82	0	-0.02	5.26	11	85.9	22.2	35.5	19.5	0	1003.17	497.7	212.35	13.18	28.51
2023-04-08 01:00:00	10.86	69.42	22.84	0	0.28	162.84	0	1003.7	0.6	0.4	12.86	21.08	0	-0.011
2023-04-08 02:00:00	10.86	66.04	22.7	0	0.1	126.12	0	1003.32	0.6	0.6	12.84	20.68	0	-0.018
2023-04-08 03:00:00	10.86	72.56	21.72	0	0.16	136.2	0	1003.26	0.6	1	12.82	19.76	0	-0.016
2023-04-08 04:00:00	10.86	62.52	22.98	0	0.54	226.74	0	1003.28	0.6	0.8	12.8	20.12	0	-0.001
2023-04-08 05:00:00	10.86	62.04	23.34	0	0.46	250.76	0	1003.72	0.6	0.6	12.78	20.52	0	-0.004
2023-04-08 06:00:00	10.86	62.96	23.18	4	0.4	255.12	7.6	1004.52	5.8	5.4	12.76	20.08	0	-0.005
2023-04-08 07:00:00	10.86	69.58	23.12	84.4	0.2	240.08	166	1005.22	140.6	133.2	12.76	22.12	0	0.008
2023-04-08 08:00:00	10.86	54.32	25.86	237	0.6	299.96	483.8	1005.86	433.4	362	12.8	27.3	0	0.137
2023-04-08 09:00:00	10.86	44.44	28.38	459.4	1.28	209.74	953.4	1006.52	865.6	548.2	12.86	32.64	0	0.343
2023-04-08 10:00:00	10.84	36.22	30.12	394.2	1.08	221.54	806	1006.56	698.4	653.8	12.9	33.1	0	0.342
2023-04-08 11:00:00	10.84	29.46	31.68	584	1.1	266.9	1197.8	1006.5	1051.4	854.8	12.94	36.62	0	0.491
2023-04-08 12:00:00	10.84	25.8	33.2	775.8	1.46	295.5	1567.4	1006.02	1409.2	815.6	13	39.52	0	0.66
2023-04-08 13:00:00	10.84	23.44	33.88	865.2	1.88	301.1	1743	1005.24	1589.6	790.4	13.04	40.34	0	0.754
2023-04-08 14:00:00	10.84	23.82	34.62	692.6	1.86	250.02	1415	1004.42	1220	772.8	13.06	41.04	0	0.644
2023-04-08 15:00:00	10.84	24.44	34.36	382.6	1.34	291.88	787.4	1003.78	662.4	606.6	13	38.16	0	0.397
2023-04-08 16:00:00	10.84	25.32	34.38	340.8	1.54	306.14	708.8	1003.38	597	510.4	12.94	37.28	0	0.372
2023-04-08 17:00:00	10.84	25.52	33.82	200.4	1.58	288.52	412.8	1003.2	344.2	290.6	12.88	35.1	0	0.27
2023-04-08 18:00:00	10.84	29.04	32.62	75.4	0.86	301.36	151.6	1003.32	122.6	121.2	12.8	31.48	0	0.122
2023-04-08 19:00:00	10.84	46	29.04	2.6	0.16	136.7	6.2	1003.46	4.6	4.2	12.72	25.94	0	0.017
2023-04-08 20:00:00	10.86	61.26	25.42	0	0	49.2	0.2	1004	0.6	0.4	12.66	23.38	0	-0.011
2023-04-08 21:00:00	10.86	61.94	24.68	0	0	71.18	0.2	1004.44	0.6	0.4	12.62	22.4	0	-0.011
2023-04-08 22:00:00	10.86	71.2	23.68	0	0	128.46	0.2	1005.22	0.6	0.4	12.58	21.7	0	-0.01
2023-04-08 23:00:00	10.86	64.22	24.48	0	0.3	205.82	0.2	1005.3	0.6	0.4	12.54	21.4	0	0
2023-04-09	10.86	66.34	23.84	0	0.14	156.72	0	1005.18	0.6	0.4	12.52	21.08	0	-0.006	4.47	4	78.8	22.4	34.8	21.3	0	1004.56	381.25	269.8	12.81	28.035
2023-04-09 01:00:00	10.86	74.06	23.14	0	0.14	176.62	0	1004.86	0.6	0.4	12.5	21.48	0	-0.006
2023-04-09 02:00:00	10.86	59.9	24.66	0	0.32	292.2	0	1004.7	0.6	0.4	12.48	22.28	0	0.002
2023-04-09 03:00:00	10.86	58.58	25	0	0.6	257.88	0	1004.36	0.6	0.4	12.48	22.74	0	0.013
2023-04-09 04:00:00	10.86	72.62	23.16	0	0.42	204.58	0.2	1003.98	0.6	0.4	12.46	22.38	0	0.001
2023-04-09 05:00:00	10.86	64.66	24.08	0	0.44	261.68	0	1004.08	0.6	0.4	12.46	22.54	0	0.005
2023-04-09 06:00:00	10.86	66.02	23.76	3	0.42	224.16	5.4	1004.82	3.8	3.6	12.44	22.04	0	0.005
2023-04-09 07:00:00	10.86	69.58	23.92	70.6	0.32	207.16	153	1005.38	132.6	118.6	12.44	23.42	0	0.006
2023-04-09 08:00:00	10.86	58.72	26.5	295.6	0.72	309.36	599	1006.18	558	349	12.48	28.88	0	0.188
2023-04-09 09:00:00	10.86	50.8	28.54	475.6	1.72	225.32	984.2	1006.78	900	455.6	12.52	32.96	0	0.367
2023-04-09 10:00:00	10.84	46.84	30.32	674.2	1.8	253.18	1395	1006.66	1288	547.6	12.58	36.1	0	0.534
2023-04-09 11:00:00	10.84	42.28	32.14	805.6	1.8	267.54	1650	1006.48	1524.4	604.6	12.64	38.86	0	0.658
2023-04-09 12:00:00	10.84	36.28	33.44	904.4	1.92	272.64	1843.4	1005.68	1676.8	588.2	12.68	40.76	0	0.759
2023-04-09 13:00:00	10.84	34.16	34.3	895.6	2	165.98	1834	1004.66	1696	572.4	12.7	41.82	0	0.773
2023-04-09 14:00:00	10.84	32.56	34.8	801.8	2	189.1	1678.4	1003.58	1462.6	533.2	12.7	42.6	0	0.714
2023-04-09 15:00:00	10.84	32.3	35.16	654	1.96	273.5	1397.2	1002.52	1223.8	493	12.66	42.42	0	0.609
2023-04-09 16:00:00	10.84	31.52	35.2	462.6	1.88	198.5	996.6	1001.74	863.4	421.6	12.6	41.12	0	0.466
2023-04-09 17:00:00	10.84	32.5	34.98	256	1.66	291.02	548	1001.02	463.6	278.6	12.52	38.52	0	0.3
2023-04-09 18:00:00	10.84	34.74	34.04	71.2	1.22	287.9	164.6	1000.78	132.6	115.2	12.4	34.12	0	0.144
2023-04-09 19:00:00	10.84	43.88	32	3	0.5	274.66	6.6	1001.38	5	4.6	12.3	28.58	0	0.041
2023-04-09 20:00:00	10.86	60.24	28.26	0	0.04	181.28	0	1001.96	0.6	0.4	12.24	25.46	0	-0.017
2023-04-09 21:00:00	10.86	67.18	26.52	0	0	163.42	0.2	1002.6	0.6	0.4	12.2	24.2	0	-0.019
2023-04-09 22:00:00	10.86	68.54	26.04	0	0.28	114.56	0	1003.1	0.6	0.4	12.16	23.66	0	-0.009
2023-04-09 23:00:00	10.86	71.84	25.52	0	0.1	185.28	0.2	1003.12	0.6	0.4	12.14	22.94	0	-0.015
2023-04-10	10.86	77.72	24.18	0	0	152.78	0.2	1002.72	0.6	0.6	12.1	21.98	0	-0.017	5.5	10	81.6	30.3	35.4	22.3	0	1003.88	497.35	212.1	12.45	30.075
2023-04-10 01:00:00	10.86	82.56	23.14	0	0	119.78	0.2	1002.26	0.6	0.4	12.08	21.42	0	-0.017
2023-04-10 02:00:00	10.86	89.36	22.88	0	0	142.32	0	1001.9	0.6	0.6	12.06	20.94	0	-0.016
2023-04-10 03:00:00	10.86	90.48	22.26	0	0	159.52	0	1001.42	0.6	0.8	12.02	20.44	0	-0.016
2023-04-10 04:00:00	10.86	99.12	21.36	0	0	121.92	0	1001.28	0.6	1.2	12	19.82	0	-0.015
2023-04-10 05:00:00	10.86	83.34	22.7	0	0.42	265.46	0	1001.68	0.6	0.8	11.98	19.54	0	-0.009
2023-04-10 06:00:00	10.86	79.44	23.26	4.6	0.5	244.78	10	1002.36	7.4	7.2	11.96	19.86	0	-0.004
2023-04-10 07:00:00	10.86	80.82	23.42	85.8	0.36	246.7	186.6	1003.02	165.6	134.8	11.96	22.22	0	0.017
2023-04-10 08:00:00	10.86	70.74	25.9	278.8	0.92	239.74	567.4	1004	528.2	320	12	28.5	0	0.176
2023-04-10 09:00:00	10.86	54.96	28.96	492.8	1.18	253.98	1011	1004.5	922	448.6	12.06	33.62	0	0.364
2023-04-10 10:00:00	10.84	38.28	32.18	686.4	1.3	316.36	1409.6	1004.68	1295.8	535.2	12.12	37.78	0	0.547
2023-04-10 11:00:00	10.84	31.02	33.78	779.6	1.54	271.66	1583.8	1004.36	1434.4	630.6	12.16	39.94	0	0.657
2023-04-10 12:00:00	10.84	23.96	34.82	898.8	2.28	79.3	1805.6	1003.7	1611.8	668.2	12.18	40.88	0	0.803
2023-04-10 13:00:00	10.84	22.14	35.56	847.2	2.18	309.18	1703.4	1002.76	1524	690	12.18	42.08	0	0.779
2023-04-10 14:00:00	10.84	21.62	36.18	784.6	2.26	271.94	1615.4	1001.46	1373.6	557.2	12.16	42.5	0	0.747
2023-04-10 15:00:00	10.84	20.76	36.42	659	2.54	193.58	1380.4	1000.26	1188.6	485.6	12.1	42.16	0	0.677
2023-04-10 16:00:00	10.84	19.86	36.5	455.2	2.48	227.32	954.4	999.76	814	420	12.02	40.72	0	0.531
2023-04-10 17:00:00	10.84	19.48	36.04	256.8	2.3	263.52	534	999.44	448.2	276.2	11.92	38.18	0	0.376
2023-04-10 18:00:00	10.84	22.84	34.88	68.8	1.12	228.76	154.8	999.52	124	108	11.82	33.48	0	0.154
2023-04-10 19:00:00	10.84	32.46	31.4	2	0.32	117.74	5.4	1000.2	4	3.6	11.7	26.62	0	0.034
2023-04-10 20:00:00	10.86	44.52	27.78	0	0.06	132.12	0.2	1000.96	0.6	0.4	11.64	23.76	0	-0.019
2023-04-10 21:00:00	10.86	53.58	25.26	0	0	155.18	0.2	1001.66	0.6	0.4	11.6	22.24	0	-0.021
2023-04-10 22:00:00	10.86	61.88	24	0	0	151.84	0.2	1002.1	0.6	0.4	11.56	21.26	0	-0.019
2023-04-10 23:00:00	10.86	60.56	23.24	0	0	178.22	0	1002.2	0.6	0.8	11.54	20.3	0	-0.02
2023-04-11	10.86	65.32	22.52	0	0.1	75.84	0	1001.86	0.6	1	11.52	19.58	0	-0.015	5.69	11	100	18.4	36.7	21	0	1001.97	477	220.5	11.93	29.08
2023-04-11 01:00:00	10.86	68.1	21.62	0	0	147.78	0	1001.54	0.6	1	11.48	18.98	0	-0.018
2023-04-11 02:00:00	10.86	71.86	20.62	0	0	156.38	0	1001.04	0.6	1	11.46	18.36	0	-0.018
2023-04-11 03:00:00	10.86	57.22	22.52	0	0.34	200.78	0.2	1000.5	0.6	0.8	11.44	17.9	0	-0.005
2023-04-11 04:00:00	10.86	63.9	20.74	0	0	185.64	0.2	1000.4	0.6	1	11.44	17.38	0	-0.019
2023-04-11 05:00:00	10.86	63.84	20.18	0	0	137.98	0.2	1000.8	0.6	1	11.42	17.08	0	-0.019
2023-04-11 06:00:00	10.86	67.16	19.62	5	0.1	188.98	12.4	1001.42	9.4	9.8	11.4	16.86	0	-0.013
2023-04-11 07:00:00	10.86	54.66	22.5	95	0.16	256.74	216.4	1001.94	199.6	136.6	11.4	20.76	0	0.007
2023-04-11 08:00:00	10.86	44.22	26.06	302.4	0.98	301.58	618.4	1002.62	586.8	294.6	11.46	28.46	0	0.202
2023-04-11 09:00:00	10.86	34.72	29.52	521.4	1.6	303.36	1072.8	1003.18	976.6	410.6	11.5	33.62	0	0.416
2023-04-11 10:00:00	10.84	29.14	31.86	714.8	1.72	200.52	1460.2	1003.44	1328.6	464.4	11.54	37.32	0	0.589
2023-04-11 11:00:00	10.84	24.46	33.64	869.6	2.24	308.46	1752.8	1003.28	1553.4	511.6	11.58	39.56	0	0.756
2023-04-11 12:00:00	10.84	23.16	34.96	935.8	2.26	220.42	1860.8	1002.72	1634.4	494.2	11.58	41.26	0	0.829
2023-04-11 13:00:00	10.84	20.92	35.82	913.2	2.98	218.44	1817	1001.76	1594.6	530.8	11.58	42.02	0	0.873
2023-04-11 14:00:00	10.84	19.88	36.54	841.2	3.04	252.66	1716	1000.78	1445.6	502.4	11.52	42.54	0	0.838
2023-04-11 15:00:00	10.84	19.02	36.94	681.4	2.98	316.38	1420.6	999.86	1221.6	448.4	11.44	42.36	0	0.729
2023-04-11 16:00:00	10.84	19.26	36.98	491	2.68	281.92	1035.6	999.24	891.2	392.2	11.36	41.38	0	0.571
2023-04-11 17:00:00	10.84	18.62	36.68	274.6	2.4	263.56	575.2	998.98	490.4	264.4	11.24	39.06	0	0.398
2023-04-11 18:00:00	10.84	19.58	35.64	77	1.58	202.74	181.4	999.18	146.4	115	11.12	34.64	0	0.203
2023-04-11 19:00:00	10.84	26.72	32.82	3	0.5	207.06	7.4	999.84	5.6	5.4	11	27.6	0	0.053
2023-04-11 20:00:00	10.86	43.96	27.28	0	0	149.3	0.2	1000.54	0.6	0.4	10.92	23.74	0	-0.026
2023-04-11 21:00:00	10.86	53.42	25.52	0	0.1	138.02	0.2	1001.2	0.6	0.4	10.88	22.42	0	-0.018
2023-04-11 22:00:00	10.86	58.84	24.58	0	0	133.5	0.2	1001.76	0.6	0.4	10.86	21.66	0	-0.022
2023-04-11 23:00:00	10.86	56.02	24.48	0	0.2	202.56	0	1001.92	0.6	0.4	10.84	21.06	0	-0.013
2023-04-12	10.86	56.66	23.8	0	0.12	110.5	0.2	1001.7	0.6	0.4	10.82	20.46	0	-0.017	6.27	11	72.8	17.7	37.2	19.2	0	1001.24	503.75	191.15	11.305	28.605
2023-04-12 01:00:00	10.86	60.14	22.82	0	0	161.36	0	1001.36	0.6	0.6	10.8	19.82	0	-0.022
2023-04-12 02:00:00	10.86	60.36	22.94	0	0.2	188.68	0	1000.98	0.6	0.6	10.8	19.5	0	-0.014
2023-04-12 03:00:00	10.86	58.06	22.96	0	0.2	160.46	0.2	1000.46	0.6	0.6	10.78	19.32	0	-0.013
2023-04-12 04:00:00	10.86	47.58	24.12	0	0.34	250.5	0	1000.36	0.6	0.4	10.78	19.46	0	-0.006
2023-04-12 05:00:00	10.86	50.16	23.48	0	0.32	184.5	0	1000.64	0.6	0.4	10.76	19.3	0	-0.007
2023-04-12 06:00:00	10.86	57.86	21.7	5.6	0.14	218.28	13	1000.96	10	10.2	10.74	18.56	0	-0.014
2023-04-12 07:00:00	10.86	57.6	23.58	95.4	0	178.72	216.6	1001.38	201.4	141.8	10.76	22.34	0	0.003
2023-04-12 08:00:00	10.86	43.72	26.92	305.6	0.82	268.92	624.8	1002.12	599.4	305.6	10.82	29.62	0	0.201
2023-04-12 09:00:00	10.84	35.74	30.28	516.8	1.54	303.98	1067.4	1002.54	976.8	429.6	10.86	34.52	0	0.415
2023-04-12 10:00:00	10.84	33.24	32.9	694.6	1.62	272.86	1421.6	1002.66	1293	524	10.9	38.32	0	0.578
2023-04-12 11:00:00	10.84	27.68	35.08	834.2	2.22	317.92	1685	1002.34	1471.4	591.8	10.94	40.82	0	0.745
2023-04-12 12:00:00	10.84	24.78	36.42	912	2.44	229.88	1825.6	1001.68	1606.2	575.8	10.94	42.54	0	0.839
2023-04-12 13:00:00	10.84	22.62	37.22	899.6	2.68	233.22	1811.8	1000.78	1579.6	589.8	10.92	43.6	0	0.862
2023-04-12 14:00:00	10.84	22.04	37.7	801.4	2.76	161.5	1645.8	999.8	1372.8	560.4	10.86	43.94	0	0.805
2023-04-12 15:00:00	10.82	20.84	38.18	661	2.86	158.76	1391.4	998.7	1186.4	499.2	10.76	43.76	0	0.717
2023-04-12 16:00:00	10.82	20.78	38.26	471.8	2.76	172.5	1003.6	998.04	857	419.4	10.64	42.54	0	0.573
2023-04-12 17:00:00	10.84	20.96	37.84	253.2	2.36	173.6	539.6	997.86	458.8	276.8	10.52	39.94	0	0.386
2023-04-12 18:00:00	10.84	23.9	36.64	70.4	1.5	202.4	164.2	997.94	132	113.4	10.38	35.58	0	0.188
2023-04-12 19:00:00	10.84	33.16	32.98	2.4	0.36	229.1	6.6	998.52	4.8	4.6	10.28	29.1	0	0.038
2023-04-12 20:00:00	10.86	37.28	31.22	0	0.34	259.54	0.2	999.26	0.6	0.4	10.2	26.2	0	-0.001
2023-04-12 21:00:00	10.86	45.68	29.48	0	0.04	206.02	0.2	1000.04	0.6	0.4	10.14	24.98	0	-0.02
2023-04-12 22:00:00	10.86	53.8	27.22	0	0.04	154.54	0	1000.66	0.6	0.4	10.1	23.84	0	-0.019
2023-04-12 23:00:00	10.86	60.1	25.6	0	0	160.4	0.2	1000.48	0.6	0.4	10.08	23.04	0	-0.02
2023-04-13	10.86	61.64	25.16	0.2	0.1	172.16	0.2	1000.04	0.6	0.4	10.06	22.54	0	-0.016	6.2	11	68.8	19.9	38.4	21.6	0	1000.4	489.8	210.3	10.615	30.135
2023-04-13 01:00:00	10.86	53.5	26.44	0	0.1	189.2	0.2	999.66	0.6	0.4	10.06	22.26	0	-0.016
2023-04-13 02:00:00	10.86	62.4	24.68	0	0.04	230.78	0.2	999.34	0.6	0.4	10.04	21.78	0	-0.018
2023-04-13 03:00:00	10.86	64.68	24.5	0	0.16	184.76	0.2	998.9	0.6	0.4	10.04	21.54	0	-0.013
2023-04-13 04:00:00	10.86	68.14	23.9	0	0.1	223.08	0.2	998.86	0.6	0.4	10.04	21.14	0	-0.015
2023-04-13 05:00:00	10.86	63.58	24.2	0	0.1	208.94	0	999.12	0.6	0.4	10.02	20.96	0	-0.016
2023-04-13 06:00:00	10.86	70.82	22.86	5.6	0.04	143.36	10.2	999.7	9.8	9.4	10.02	20.6	0	-0.015
2023-04-13 07:00:00	10.86	66.9	24.4	89.4	0.2	251.92	191.2	1000.34	175.2	142.2	10.04	23.76	0	0.014
2023-04-13 08:00:00	10.86	51.94	28.1	278.8	1.06	297.84	567.8	1001.08	532.4	325	10.08	30.26	0	0.196
2023-04-13 09:00:00	10.84	42.46	31.24	492.8	1.38	315.6	1014.4	1001.34	919.8	462.6	10.14	35.36	0	0.393
2023-04-13 10:00:00	10.84	37.9	33.42	683.8	1.68	264.46	1390.6	1001.22	1254.6	542.2	10.18	38.88	0	0.574
2023-04-13 11:00:00	10.84	32.84	35.62	821.2	1.88	259.86	1656	1000.94	1438.6	600	10.22	41.72	0	0.719
2023-04-13 12:00:00	10.84	27.68	37.32	903	2.18	312.7	1807.8	1000.28	1608.2	573.2	10.24	43.64	0	0.826
2023-04-13 13:00:00	10.84	24.76	38.16	900.4	2.6	264.58	1815.4	999.32	1579	589.8	10.22	44.72	0	0.866
2023-04-13 14:00:00	10.82	24.02	38.78	805.2	2.56	317.46	1654.2	998.28	1376.4	566.6	10.16	45.26	0	0.804
2023-04-13 15:00:00	10.82	23.04	39.12	651.2	2.6	270.6	1365.4	997.2	1157	511.8	10.06	44.82	0	0.697
2023-04-13 16:00:00	10.82	22.66	39.14	459.8	2.54	266.8	976.2	996.52	831.4	414	9.94	43.48	0	0.553
2023-04-13 17:00:00	10.84	23.28	38.86	265.4	2.08	279.48	560.4	996.22	480	278.4	9.82	41.2	0	0.372
2023-04-13 18:00:00	10.84	25.46	37.66	73.4	1.26	268.56	169.4	996.38	137.8	117.2	9.7	36.68	0	0.17
2023-04-13 19:00:00	10.84	39.9	33.58	2.6	0.24	188.36	6.4	997.02	4.8	4.2	9.58	30	0	0.026
2023-04-13 20:00:00	10.84	54.8	29.38	0	0	124.4	0.2	997.94	0.6	0.4	9.5	26.9	0	-0.02
2023-04-13 21:00:00	10.86	59.38	27.98	0	0	140.68	0.2	998.68	0.6	0.4	9.44	25.54	0	-0.019
2023-04-13 22:00:00	10.86	63.72	27.24	0	0	109.76	0.2	998.94	0.6	0.4	9.4	24.74	0	-0.018
2023-04-13 23:00:00	10.86	61.5	27.72	0	0.36	161.9	0.2	999.04	0.6	0.4	9.36	24.32	0	-0.003
2023-04-14	10.86	64.14	26.64	0	0.4	148.92	0	998.64	0.6	0.4	9.34	23.8	0	-0.003	6.05	11	78	21.4	39.2	22.3	0	998.955	479.65	214.2	9.9	31.39
2023-04-14 01:00:00	10.86	64.26	26.4	0	0.28	142.74	0.2	998.4	0.6	0.4	9.3	23.38	0	-0.007
2023-04-14 02:00:00	10.86	70.76	25.18	0	0.1	167.5	0	998.14	0.6	0.4	9.28	22.78	0	-0.014
2023-04-14 03:00:00	10.86	72.54	24.68	0	0	151.76	0.2	997.92	0.6	0.4	9.28	22.42	0	-0.018
2023-04-14 04:00:00	10.86	73	24.2	0	0	140.68	0.2	997.88	0.6	0.4	9.26	22.26	0	-0.018
2023-04-14 05:00:00	10.86	74.34	23.64	0	0	149.18	0.2	998.22	0.6	0.4	9.26	21.9	0	-0.018
2023-04-14 06:00:00	10.86	77.22	23.56	6	0	166.96	12.6	999	9.6	9.2	9.24	21.64	0	-0.015
2023-04-14 07:00:00	10.86	83.18	24.64	91	0	143.32	191.4	999.68	#+INF	#+INF	9.26	24.58	0	0.018
2023-04-14 08:00:00	10.86	58.4	29.14	291.2	0.54	242.5	581.8	1000.3	541.8	339.6	9.32	31.5	0	0.19
2023-04-14 09:00:00	10.84	48.12	31.96	495.4	0.94	252.26	1005.8	1000.78	904.4	478.8	9.4	36.58	0	0.38
2023-04-14 10:00:00	10.84	37.22	34.86	683.6	1.22	269.98	1390.2	1001.02	1251.8	588.4	9.5	40.56	0	0.566
2023-04-14 11:00:00	10.84	29.74	37.24	817.2	1.24	67.54	1651.6	1000.7	1445.6	654.8	9.58	43.34	0	0.701
2023-04-14 12:00:00	10.84	23.9	38.32	899.6	1.54	222.7	1806	1000.08	1597.2	691	9.62	45.18	0	0.8
2023-04-14 13:00:00	10.82	25.02	38.72	832.6	1.86	137.2	1678.6	999.2	1436.8	730.2	9.6	45.8	0	0.781
2023-04-14 14:00:00	10.82	23.04	39.14	754.8	1.6	166.84	1553	997.98	1280.6	674	9.54	45.84	0	0.71
2023-04-14 15:00:00	10.82	22.7	39.28	559.6	1.92	318.72	1173.2	996.94	973.8	587.6	9.48	45.04	0	0.591
2023-04-14 16:00:00	10.82	22.76	39.1	390	1.72	275.2	819.8	996.34	682.2	462.2	9.38	43.58	0	0.445
2023-04-14 17:00:00	10.84	23.88	38.46	212.2	1.68	20.54	441.6	996.08	367.2	284.4	9.32	41	0	0.307
2023-04-14 18:00:00	10.84	28.16	36.96	68.2	0.58	86.44	148	996.22	119	114.8	9.2	36	0	0.106
2023-04-14 19:00:00	10.84	46.92	31.98	2	0.06	130.42	5.6	996.7	4	3.6	9.1	29.78	0	0.01
2023-04-14 20:00:00	10.86	54.84	29.04	0	0	135.52	0	997.34	0.6	0.4	9	27.24	0	-0.015
2023-04-14 21:00:00	10.86	58.86	28.14	0	0	101.74	0.2	998.1	0.6	0.4	8.94	26.12	0	-0.014
2023-04-14 22:00:00	10.86	58.5	28.06	0	0.04	131.94	0	998.54	0.6	0.4	8.9	25.62	0	-0.012
2023-04-14 23:00:00	10.86	62.38	26.72	0	0	136.08	0	998.58	0.6	0.4	8.86	24.64	0	-0.014
2023-04-15	10.86	63.98	25.84	0	0	92.28	0.2	998.32	0.6	0.4	8.82	24	0	-0.014	5.45	10	88.4	21.7	39.6	23.2	0	998.435	#+INF	#+INF	9.27	32.115
2023-04-15 01:00:00	10.86	68.24	25.44	0	0.04	88.56	0.2	998.12	0.6	0.4	8.8	23.3	0	-0.012
2023-04-15 02:00:00	10.86	74.24	24.76	0	0	151.06	0.2	998	0.6	0.4	8.76	22.6	0	-0.013
2023-04-15 03:00:00	10.86	76.88	24	0	0	163.7	0	997.98	0.6	0.4	8.74	22.18	0	-0.013
2023-04-15 04:00:00	10.86	74.7	23.78	0	0	146.42	0	998.1	0.6	0.4	8.72	21.62	0	-0.013
2023-04-15 05:00:00	10.86	79.34	23.06	0	0	175.74	0	998.74	0.6	0.4	8.7	21.18	0	-0.013
2023-04-15 06:00:00	10.86	81.38	22.62	6.6	0	130.62	14.2	999.4	10.6	10.4	8.68	21.06	0	-0.01
2023-04-15 07:00:00	10.86	77.68	24.58	93.4	0	123.8	200.2	1000.18	179.6	144.6	8.7	24.28	0	0.017
2023-04-15 08:00:00	10.86	54.82	29.98	285.6	0.34	173.14	578.4	1000.78	542.2	323.4	8.78	31.78	0	0.181
2023-04-15 09:00:00	10.84	41.08	32.5	498.4	0.88	248.68	1019.2	1001.2	913.4	473.6	8.88	37.44	0	0.382
2023-04-15 10:00:00	10.84	30.78	35.4	651	1.18	226.76	1335	1001.14	1199.2	545	9.04	42.02	0	0.547
2023-04-15 11:00:00	10.84	25.2	37.42	814	1.22	170.06	1645.6	1000.9	1438	609	9.22	44.98	0	0.698
2023-04-15 12:00:00	10.84	21.08	38.78	884.4	1.02	182.28	1775	1000.18	1577.4	585.2	9.36	47.84	0	0.757
2023-04-15 13:00:00	10.82	20.72	39.48	868.8	1.46	224.7	1753	999.26	1504.6	610.4	9.44	48.92	0	0.788
2023-04-15 14:00:00	10.82	20.94	39.84	745.6	1.66	173.74	1541.2	998.2	1270.6	575.6	9.48	48.96	0	0.716
2023-04-15 15:00:00	10.82	20.28	39.96	653	2	309.6	1361.8	997.12	1128.4	579.2	9.46	48.2	0	0.668
2023-04-15 16:00:00	10.82	20.58	39.78	376.6	1.8	74.6	789.6	996.46	651.6	478.2	9.4	45.38	0	0.451
2023-04-15 17:00:00	10.84	22.54	38.76	139.8	1.22	175.7	261.2	996.16	248.6	244.8	9.26	40.4	0	0.23
2023-04-15 18:00:00	10.84	33.72	36.92	44	0.44	89.72	78	996.2	84.2	83.2	9.1	36.2	0	0.079
2023-04-15 19:00:00	10.84	38.28	35.08	1.2	0.24	64.68	2	996.7	3.2	2.8	8.98	32.8	0	0.025
2023-04-15 20:00:00	10.84	51.22	31.76	0	0	126.48	0.2	997.38	0.6	0.4	8.9	30.72	0	-0.014
2023-04-15 21:00:00	10.86	57.36	30.54	0	0	117.72	0.2	998.02	0.6	0.4	8.84	30	0	-0.013
2023-04-15 22:00:00	10.86	59.42	30.04	0	0	146.78	0	998.4	0.6	0.4	8.8	28.76	0	-0.013
2023-04-15 23:00:00	10.86	63.24	28.66	0	0.04	144.42	0	998.32	0.6	0.4	8.76	27.86	0	-0.01
2023-04-16	10.86	61.62	28.88	0	0.1	159.1	0	998.16	0.6	0.4	8.72	27.84	0	-0.008	5.41	9	83.7	18.9	40.3	22.6	0	998.545	448.25	219.55	8.98	33.6
2023-04-16 01:00:00	10.86	50.28	30.52	0	0.9	241.18	0.2	998.22	0.6	0.4	8.7	28.52	0	0.032
2023-04-16 02:00:00	10.86	60.68	28.6	0	0	119.96	0.2	997.72	0.6	0.4	8.68	27.32	0	-0.013
2023-04-16 03:00:00	10.86	55.6	29.34	0	0.2	259.02	0.2	997.28	0.6	0.4	8.66	27.46	0	-0.004
2023-04-16 04:00:00	10.86	41.82	31.46	0	0.76	244.2	0.2	996.96	0.6	0.4	8.66	28.78	0	0.031
2023-04-16 05:00:00	10.86	45.6	30.5	0	0.46	268.8	0.2	997.12	0.6	0.4	8.64	28.04	0	0.013
2023-04-16 06:00:00	10.86	50.7	29.24	1.8	0.28	266.9	4.2	997.64	3	2.6	8.62	27.12	0	0.001
2023-04-16 07:00:00	10.86	54.18	29	47.4	0.04	216.2	97	998.04	86	85	8.62	27.68	0	-0.013
2023-04-16 08:00:00	10.86	54.38	29.72	180.2	0.6	272.38	377	998.76	350.2	300.8	8.64	30.38	0	0.131
2023-04-16 09:00:00	10.84	47.08	32.18	310.4	1.3	281.6	675.6	999.18	646.4	579.8	8.72	35.7	0	0.283
2023-04-16 10:00:00	10.84	36.62	34.8	655.6	1.92	256.82	1336.8	999.4	1319.8	641	8.82	40.2	0	0.582
2023-04-16 11:00:00	10.84	33.12	36.4	808.6	2.36	299.52	1640	999.1	1670.2	668.8	8.98	43.6	0	0.744
2023-04-16 12:00:00	10.84	30.48	37.6	883	2.28	201.28	1777	998.28	1768.2	629.4	9.12	45.86	0	0.819
2023-04-16 13:00:00	10.84	28.92	38.2	875.4	2.02	276.24	1777.4	997.24	1773.4	632.2	9.22	47.42	0	0.811
2023-04-16 14:00:00	10.82	27.36	39	787.6	2.34	299.78	1634	996.12	1592.6	588.8	9.26	47.94	0	0.776
2023-04-16 15:00:00	10.82	26.82	39.58	639.2	2	289.9	1357.6	995.04	1284.8	526.4	9.24	47.94	0	0.648
2023-04-16 16:00:00	10.82	26.32	39.72	423.8	1.66	312.18	901.2	994.16	838.6	449.8	9.18	45.98	0	0.462
2023-04-16 17:00:00	10.82	26.06	39.5	250.8	1.54	302.66	530.2	993.8	469.6	312.6	9.08	43.58	0	0.318
2023-04-16 18:00:00	10.84	30.02	38.16	83.4	0.54	251.76	177.6	993.86	148.6	132.6	8.94	38.38	0	0.109
2023-04-16 19:00:00	10.84	48.54	33.24	5.4	0	158.66	10.4	994.46	8.4	8	8.78	32.42	0	0.01
2023-04-16 20:00:00	10.84	54.58	31.08	0	0.22	101.08	0	995.3	0.6	0.4	8.68	29.74	0	-0.005
2023-04-16 21:00:00	10.86	53.62	30.84	0	0.06	120.96	0	996.24	0.6	0.4	8.62	28.32	0	-0.014
2023-04-16 22:00:00	10.86	62.94	28.2	0	0	111.1	0.2	996.6	0.6	0.4	8.54	26.68	0	-0.016
2023-04-16 23:00:00	10.86	67.52	27.48	0	0	151.26	0.2	996.78	0.6	0.4	8.5	26	0	-0.015
2023-04-17	10.86	72.52	27.02	0	0	183.52	0	996.64	0.6	0.4	8.46	25.4	0	-0.015	5.68	8	74.6	24.6	39.9	26.9	0	996.83	498.6	231.75	8.81	34.6
2023-04-17 01:00:00	10.86	74.4	26.8	0	0.04	257.8	0.2	996.22	0.6	0.4	8.44	24.7	0	-0.013
2023-04-17 02:00:00	10.86	73.96	26.08	0	0	312.96	0.2	995.86	0.6	0.4	8.4	23.92	0	-0.015
2023-04-17 03:00:00	10.86	75.84	24.96	0	0	312.96	0.2	995.48	0.6	0.4	8.38	23.24	0	-0.015
2023-04-17 04:00:00	10.86	77.1	24.5	0	0	233.2	0.2	995.42	0.6	0.4	8.36	22.8	0	-0.015
2023-04-17 05:00:00	10.86	76.04	24.28	0	0	145.48	0.2	995.72	0.6	0.4	8.34	22.44	0	-0.015
2023-04-17 06:00:00	10.86	75.12	23.92	6.4	0.04	174.16	13.6	996.36	12.8	12.4	8.32	22.32	0	-0.011
2023-04-17 07:00:00	10.86	75.86	25.54	96.8	0	159.7	206.6	997.08	194	157.6	8.34	25.32	0	0.02
2023-04-17 08:00:00	10.86	52.4	29.7	288	0.8	203.24	582	997.68	569.6	340.6	8.4	32.26	0	0.2
2023-04-17 09:00:00	10.84	43.28	32.3	497	1.2	306.92	1017.6	998.24	1002.6	474	8.52	37.62	0	0.395
2023-04-17 10:00:00	10.84	34.8	35.24	688.8	1.5	269.98	1409.6	998.48	1394	534.4	8.68	42.08	0	0.588
2023-04-17 11:00:00	10.84	28.34	37.68	832	1.48	288.02	1693	998.28	1723.2	585.2	8.86	45.7	0	0.729
2023-04-17 12:00:00	10.84	23.28	39.36	901.6	1.66	285.7	1818.6	997.96	1810	576.4	9	47.96	0	0.82
2023-04-17 13:00:00	10.82	20.34	40.58	897.8	2.02	204.52	1825.8	997.26	1811.2	585.6	9.08	49.36	0	0.86
2023-04-17 14:00:00	10.82	18.72	41.08	792.6	2.84	218.76	1643.6	996.44	1590.6	567.4	9.1	48.96	0	0.849
2023-04-17 15:00:00	10.82	18.78	41.22	636.4	2.88	224.16	1335	995.68	1249.2	544.2	9.06	48	0	0.738
2023-04-17 16:00:00	10.82	18.28	41.12	437	2.66	214.04	922.8	995.16	856.2	457.2	9	46.38	0	0.572
2023-04-17 17:00:00	10.82	18.88	40.62	249.2	2.3	271.02	521.2	995	458.2	308	8.88	43.64	0	0.4
2023-04-17 18:00:00	10.84	22	39.4	73.2	1.02	227.56	163	995.38	137.6	124.4	8.74	39.16	0	0.158
2023-04-17 19:00:00	10.84	37.68	34.66	3.6	0.16	195.66	8.4	996.18	6.8	6.4	8.58	32.4	0	0.022
2023-04-17 20:00:00	10.84	50.28	30.82	0	0	141.02	0.2	997.14	0.6	0.4	8.46	29.2	0	-0.019
2023-04-17 21:00:00	10.86	56.98	29.04	0	0	137.1	0	997.84	0.6	0.4	8.38	27.66	0	-0.017
2023-04-17 22:00:00	10.86	58.9	28.48	0	0	146.82	0.2	998.44	0.6	0.4	8.34	26.8	0	-0.017
2023-04-17 23:00:00	10.86	59.62	27.82	0	0	137.6	0.2	998.44	0.6	0.4	8.28	26.02	0	-0.017
2023-04-18	10.86	63.12	26.92	0	0	118.94	0	998.12	0.6	0.4	8.26	25.22	0	-0.017	6.18	11	79.8	17.6	41.3	23.6	0	996.825	534.25	219.9	8.595	33.88
2023-04-18 01:00:00	10.86	68.68	26.12	0	0	118.94	0.2	997.42	0.6	0.4	8.22	24.56	0	-0.016
2023-04-18 02:00:00	10.86	73.26	25.56	0	0	131.08	0	996.98	0.6	0.4	8.2	24.04	0	-0.015
2023-04-18 03:00:00	10.86	73.4	25.84	0	0	112.3	0.2	996.76	0.6	0.4	8.18	24.08	0	-0.015
2023-04-18 04:00:00	10.86	70.74	25.84	0	0	166.9	0.2	996.9	0.6	0.4	8.16	24.26	0	-0.016
2023-04-18 05:00:00	10.86	67.54	25.9	0	0.22	158.34	0.2	997.44	0.6	0.4	8.16	23.94	0	-0.008
2023-04-18 06:00:00	10.86	61.24	27.36	6.6	0.62	222.74	15.8	998.22	12.8	12.2	8.14	24.64	0	0.011
2023-04-18 07:00:00	10.86	66.4	27.04	98.6	0.26	227.1	212.6	998.8	201.8	156.8	8.16	26.54	0	0.028
2023-04-18 08:00:00	10.86	50.16	30.84	305.4	0.72	268.36	617.6	999.38	609.8	354.4	8.22	33.68	0	0.216
2023-04-18 09:00:00	10.84	39.58	33.82	499.2	1.54	284.9	1027.2	1000.28	1008	494.6	8.34	38.66	0	0.426
2023-04-18 10:00:00	10.84	31.32	35.96	692.2	2	292.32	1419.2	1000.52	1395	599.4	8.5	42.26	0	0.626
2023-04-18 11:00:00	10.84	29.54	37.58	845.2	1.88	287.24	1718.2	1000.24	1742.8	610.8	8.68	45.34	0	0.76
2023-04-18 12:00:00	10.84	25.6	39.34	917	1.96	254.92	1845.8	999.62	1815.8	572.8	8.8	47.54	0	0.849
2023-04-18 13:00:00	10.82	21.72	40.62	886	2.44	314.16	1793.2	998.8	1747.6	608.6	8.86	48.68	0	0.88
2023-04-18 14:00:00	10.82	18.44	41.22	807	3.08	329.38	1672	997.64	1609.8	559.4	8.88	48.62	0	0.878
2023-04-18 15:00:00	10.82	18.32	41.34	662.2	3.24	250.64	1404.4	996.68	1316.8	500.6	8.86	47.86	0	0.784
2023-04-18 16:00:00	10.82	18.8	41.24	473.6	2.82	262.26	1017	995.96	948.4	414.8	8.8	46.66	0	0.609
2023-04-18 17:00:00	10.82	19.86	40.66	264	2.52	300.12	566	995.46	494.8	287	8.7	43.88	0	0.425
2023-04-18 18:00:00	10.84	19.76	39.74	82.6	1.6	312.06	190.4	995.46	157.6	130.6	8.56	39.76	0	0.218
2023-04-18 19:00:00	10.84	23.72	37.1	4.4	0.56	249.94	10.2	995.8	8	7.6	8.4	33.56	0	0.064
2023-04-18 20:00:00	10.84	39.74	31.64	0	0	98.76	0	996.38	0.6	0.4	8.28	29.22	0	-0.025
2023-04-18 21:00:00	10.86	46.26	29.6	0.2	0.1	117.2	0.2	996.98	0.6	0.4	8.2	27.66	0	-0.017
2023-04-18 22:00:00	10.86	48.66	29.78	0	0.24	202.44	0.2	997.42	0.6	0.4	8.14	26.68	0	-0.008
2023-04-18 23:00:00	10.86	48.62	28.64	0	0.18	174.88	0.2	997.5	0.6	0.4	8.08	25.7	0	-0.012
2023-04-19	10.86	51.18	28.22	0	0.22	148.6	0.2	997.24	0.6	0.4	8.06	25.04	0	-0.01	6.63	11	75.4	17.5	41.4	25.2	0	997.665	544.8	221.4	8.395	34.285
2023-04-19 01:00:00	10.86	57.52	26.66	0	0	140.88	0.2	996.82	0.6	0.4	8.02	24.36	0	-0.021
2023-04-19 02:00:00	10.86	57.28	26.38	0	0.14	127.42	0.2	996.3	0.6	0.4	8	24	0	-0.014
2023-04-19 03:00:00	10.86	51.44	27.2	0	0.1	281.8	0.2	995.74	0.6	0.4	7.98	23.84	0	-0.016
2023-04-19 04:00:00	10.86	44.36	28.4	0	0.48	243.86	0	995.4	0.6	0.4	7.96	24.32	0	0.005
2023-04-19 05:00:00	10.86	52.3	26.44	0	0.28	223.6	0.2	995.46	0.6	0.4	7.94	23.22	0	-0.007
2023-04-19 06:00:00	10.86	51.44	26.46	8.8	0.6	268.92	20.8	995.84	17.4	17	7.92	23.32	0	0.011
2023-04-19 07:00:00	10.86	54.64	27.52	112.2	0	194.02	249.2	996.14	240.6	166.6	7.94	26.88	0	0.021
2023-04-19 08:00:00	10.86	43.96	30.46	322.2	0.6	269.68	648.8	996.26	667.2	328.8	8.02	34.12	0	0.219
2023-04-19 09:00:00	10.84	35.06	33.78	529	1.3	275.66	1098.6	996.66	1083.8	453.8	8.16	39.32	0	0.438
2023-04-19 10:00:00	10.84	30.92	36.22	709.6	1.66	270.2	1460.2	996.66	1433.6	524.8	8.36	43.14	0	0.623
2023-04-19 11:00:00	10.84	28.92	37.98	851.8	1.8	284.94	1729	996.48	1744.4	621.8	8.5	46	0	0.765
2023-04-19 12:00:00	10.84	25.98	39.24	918.6	2.22	308.84	1836.2	995.76	1773.4	692	8.62	47.5	0	0.865
2023-04-19 13:00:00	10.82	22.68	40.46	846	2.6	269.7	1723.6	994.76	1648.2	729.4	8.68	48.7	0	0.859
2023-04-19 14:00:00	10.82	20.44	40.72	774.2	2.94	220.14	1600.6	993.56	1522	682.6	8.7	48.6	0	0.836
2023-04-19 15:00:00	10.82	18.86	40.88	632.4	3.04	291.2	1331.4	992.42	1235.4	626.8	8.66	47.34	0	0.744
2023-04-19 16:00:00	10.82	18.88	40.6	357.2	2.9	270.56	762.8	991.78	703.4	439	8.6	45.04	0	0.538
2023-04-19 17:00:00	10.84	20.74	39.96	254	1.9	290.82	531.8	991.4	466.4	362.2	8.48	42.4	0	0.361
2023-04-19 18:00:00	10.84	22.64	39.36	98.4	0.98	254.8	217.2	991.18	182.6	161	8.36	39.76	0	0.161
2023-04-19 19:00:00	10.84	28.2	36.62	3.6	0.34	194.54	9.2	991.42	7.2	6.8	8.22	33.12	0	0.04
2023-04-19 20:00:00	10.84	31.38	34	0	0.38	258.16	0.2	992.08	0.6	0.4	8.1	30.04	0	0.014
2023-04-19 21:00:00	10.86	37.78	32.5	0	0.12	148.92	0.2	992.82	0.6	0.4	8.02	28.28	0	-0.005
2023-04-19 22:00:00	10.86	42.16	31	0	0.28	222.46	0	993.44	0.6	0.4	7.96	26.9	0	0.004
2023-04-19 23:00:00	10.86	52.3	27.86	0	0	140.78	0.2	993.72	0.6	0.4	7.92	25.72	0	-0.013
2023-04-20	10.86	54.92	27.3	0	0.1	196.3	0.2	993.52	0.6	0.4	7.88	25.18	0	-0.008	6.42	10	63	18.1	41.2	25.3	0	994.4	530.5	242.35	8.21	34.21
2023-04-20 01:00:00	10.86	47.66	28.76	0	0.38	242.4	0.2	993.18	0.6	0.4	7.86	25.26	0	0.008
2023-04-20 02:00:00	10.86	43.96	29.16	0	0.62	264.74	0.2	992.74	0.6	0.4	7.84	25.72	0	0.023
2023-04-20 03:00:00	10.86	40.54	29.26	0	0.84	287.6	0	992.46	0.6	0.4	7.82	25.9	0	0.036
2023-04-20 04:00:00	10.86	42.94	28.7	0	0.62	213.68	0	992	0.6	0.4	7.8	25.5	0	0.022
2023-04-20 05:00:00	10.86	50.06	26.96	0	0.18	209.16	0.2	991.98	0.6	0.4	7.78	23.72	0	-0.004
2023-04-20 06:00:00	10.86	51.14	26.52	9.4	0.32	199.02	21.6	992.38	17.6	17.2	7.78	23.56	0	0.007
2023-04-20 07:00:00	10.86	49.54	27.52	111.4	0.38	218.18	245.8	993	234.6	171	7.78	27.04	0	0.036
2023-04-20 08:00:00	10.86	42.34	30.46	317.6	1.06	266.22	662.4	993.46	656.8	332.6	7.86	33.92	0	0.239
2023-04-20 09:00:00	10.84	36.62	33.4	511.8	2.02	297.1	1070.2	994.46	1049.8	483.4	7.98	38.52	0	0.459
2023-04-20 10:00:00	10.84	33.74	35.3	685.4	2.08	278.26	1411.8	994.6	1386.4	595	8.14	41.84	0	0.619
2023-04-20 11:00:00	10.84	30.88	37	815.8	2.22	300.18	1654.8	994.48	1661.2	691.8	8.3	44.64	0	0.752
2023-04-20 12:00:00	10.84	27.02	38.5	888.8	2.52	209.66	1787.2	993.72	1756.6	666.8	8.42	46.64	0	0.852
2023-04-20 13:00:00	10.84	24.28	39.68	864	2.64	270.94	1750.6	992.98	1712	733.6	8.48	47.62	0	0.863
2023-04-20 14:00:00	10.82	23.62	40.04	786.2	2.5	299.18	1621	991.74	1543.4	719.2	8.52	48.08	0	0.803
2023-04-20 15:00:00	10.82	22.26	40.6	636.6	2.7	312.88	1331.6	990.54	1247	635.6	8.5	47.84	0	0.712
2023-04-20 16:00:00	10.82	21.98	40.22	410.4	3.38	266.64	844.8	990.04	774.8	521.2	8.44	44.96	0	0.595
2023-04-20 17:00:00	10.84	22.34	38.9	90.4	2.54	328.34	190.8	990	171.4	159.2	8.3	39.62	0	0.315
2023-04-20 18:00:00	10.84	20.76	37.72	30.8	2.56	178.56	61.8	990.28	54	52.6	8.14	37	0	0.27
2023-04-20 19:00:00	10.84	25.8	36.12	2.8	1.82	211.58	4.6	990.74	3.4	3	8.04	34.84	0	0.169
2023-04-20 20:00:00	10.84	29.28	34.66	0	1.32	305.78	0	991.32	0.8	0.4	7.98	32.82	0	0.076
2023-04-20 21:00:00	10.84	32.92	33.46	0	0.62	250.58	0	991.96	0.6	0.4	7.9	30.46	0	0.026
2023-04-20 22:00:00	10.86	37.26	31.86	0	0.4	233.7	0.2	992.34	0.6	0.4	7.84	28.32	0	0.009
2023-04-20 23:00:00	10.86	39.48	31.08	0.2	0.3	263.72	0.2	992.36	0.6	0.4	7.78	27.26	0	0.002
2023-04-21	10.86	35.92	31.5	0.2	1.34	291.2	0.2	992.44	0.6	0.4	7.76	28.48	0	0.064	6.95	10	53.3	17.7	40.7	26.2	0	992.3	511.5	241.1	8.045	34.565
2023-04-21 01:00:00	10.86	36.38	30.74	0	1.12	257.18	0.2	992.52	0.6	0.4	7.74	28.06	0	0.051
2023-04-21 02:00:00	10.86	38.32	29.84	0	0.78	298.46	0	992.34	0.6	0.4	7.72	26.9	0	0.03
2023-04-21 03:00:00	10.86	37.96	29.44	0	1.08	313.32	0.2	992.1	0.6	0.4	7.7	26.96	0	0.046
2023-04-21 04:00:00	10.86	35.22	30.06	0	1.9	288.14	0	992.62	0.6	0.4	7.7	28.24	0	0.086
2023-04-21 05:00:00	10.86	39.48	29.92	0	1.9	294.8	0.2	992.96	0.6	0.4	7.7	28.38	0	0.08
2023-04-21 06:00:00	10.86	44.16	28.98	4.6	1.24	301.28	9.4	993.76	7	6.6	7.68	27.66	0	0.049
2023-04-21 07:00:00	10.86	47.88	28.48	49.8	0.94	254.44	101	994.56	87	86	7.68	27.7	0	0.04
2023-04-21 08:00:00	10.86	50.24	28.48	118.4	0.82	139.52	251	995.48	219.2	217	7.7	28.62	0	0.117
2023-04-21 09:00:00	10.86	46.78	30.08	471.2	1.28	301.74	998	996.3	965.2	436.6	7.76	34.66	0	0.367
2023-04-21 10:00:00	10.84	40.36	32.38	591.8	2.04	252.32	1252.4	996.8	1215	542.6	7.92	40	0	0.522
2023-04-21 11:00:00	10.84	35.64	33.78	546.2	2.04	297.32	1138.2	996.5	1078.4	732.2	8	40.1	0	0.527
2023-04-21 12:00:00	10.84	32.54	35.22	924.2	2.24	240.76	1869.6	995.8	1810.2	614.2	8.1	43.44	0	0.814
2023-04-21 13:00:00	10.84	27.5	36.66	924.2	2.74	302.04	1889	994.56	1842	546	8.24	45.52	0	0.867
2023-04-21 14:00:00	10.84	25.2	37.36	836.4	2.94	265.6	1752.6	993.34	1679	522.4	8.28	46.12	0	0.829
2023-04-21 15:00:00	10.82	25.34	37.8	678.2	2.5	255.6	1455.8	992.28	1368.4	492	8.28	46.18	0	0.692
2023-04-21 16:00:00	10.82	26.22	37.66	478.4	2.16	251.74	1042.6	991.58	963	428	8.24	45.04	0	0.521
2023-04-21 17:00:00	10.84	26.9	37.24	246.8	2.18	120.76	539.4	991.06	470.8	312.2	8.14	42.06	0	0.354
2023-04-21 18:00:00	10.84	30.76	35.54	43	2.22	30.14	100	991.18	85.8	83.4	8	36.34	0	0.215
2023-04-21 19:00:00	10.84	32.88	34.5	2.2	1.8	76.16	4.4	992.1	3.4	3.2	7.9	34.02	0	0.146
2023-04-21 20:00:00	10.84	34.56	33.48	0	1.12	155.64	0.2	992.98	0.6	0.4	7.82	32.3	0	0.051
2023-04-21 21:00:00	10.84	38.38	32.62	0	0.9	233.94	0.2	994.7	0.6	0.4	7.76	31.02	0	0.035
2023-04-21 22:00:00	10.86	50.02	29.84	0.2	1.68	189.6	0.2	995.3	0.6	0.4	7.7	28.56	0	0.055
2023-04-21 23:00:00	10.86	52.06	28.64	0	0.64	136.5	0	995.36	0.6	0.4	7.66	27.7	0	0.011
2023-04-22	10.86	56.78	27.8	0	0.46	251.22	0.2	994.5	0.6	0.4	7.62	26.38	0	0.001	6.51	7	67.2	24.6	38.1	26.3	0	993.78	491.7	209.45	7.875	34.25
2023-04-22 01:00:00	10.86	66.52	25.9	0	0.3	124.78	0.2	994.02	0.6	0.4	7.58	24.46	0	-0.008
2023-04-22 02:00:00	10.86	69.76	25.02	0	0.4	198.42	0.2	994.06	0.6	0.4	7.52	23.58	0	-0.006
2023-04-22 03:00:00	10.86	71.6	25.68	0	0.62	143.66	0.2	994.1	0.6	0.4	7.5	24.22	0	0
2023-04-22 04:00:00	10.86	77.68	24.26	0	0.12	118.36	0.2	993.74	0.6	0.4	7.48	22.78	0	-0.014
2023-04-22 05:00:00	10.86	77.14	24.18	0	0.14	135.64	0.2	994	0.6	0.4	7.46	22.4	0	-0.014
2023-04-22 06:00:00	10.86	78.82	23.76	10.4	0.04	131.96	23.2	994.82	19.4	18.8	7.44	22.28	0	-0.012
2023-04-22 07:00:00	10.86	77.46	25.66	115.4	0.04	101.1	243.4	995.62	228	181	7.46	26.08	0	0.037
2023-04-22 08:00:00	10.86	61.54	28.86	304	0.58	222.78	622.8	996.52	615.2	355.4	7.56	32.5	0	0.201
2023-04-22 09:00:00	10.84	52	30.6	475.8	1.16	233.74	983	996.9	961.2	529.6	7.68	37.16	0	0.366
2023-04-22 10:00:00	10.84	43.36	32.4	653.4	1.2	271.34	1339.8	996.92	1325.2	711.8	7.82	40.3	0	0.525
2023-04-22 11:00:00	10.84	37.32	33.82	634.2	1.26	191.12	1288.8	997.06	1256.8	876.2	7.92	41.94	0	0.546
2023-04-22 12:00:00	10.84	33.62	34.9	834.6	1.86	259.56	1678	996.56	1616.4	729.2	8.04	44.68	0	0.731
2023-04-22 13:00:00	10.84	31.2	35.52	869	1.9	140.38	1737.2	995.82	1690.2	870.2	8.14	45.46	0	0.769
2023-04-22 14:00:00	10.84	26.76	35.72	693	1.76	96.68	1426	994.92	1345.6	783.4	8.14	44.64	0	0.646
2023-04-22 15:00:00	10.84	24.82	35.76	352.4	1.54	137.46	731.8	994.04	668.8	496.8	8.1	42.18	0	0.401
2023-04-22 16:00:00	10.84	29.98	34.9	361.6	1.62	260.22	755.2	993.56	689	550.4	8	40.34	0	0.388
2023-04-22 17:00:00	10.84	33.78	33.6	165.8	1.9	208.42	355.4	993.36	320.8	267	7.94	37.52	0	0.259
2023-04-22 18:00:00	10.84	37.2	31.76	41.2	1.42	203.62	89.6	993.5	77.8	77	7.82	32.52	0	0.137
2023-04-22 19:00:00	10.84	38.06	31.24	2.6	1.3	188.64	5.4	993.96	4.2	4	7.74	30.82	0	0.098
2023-04-22 20:00:00	10.86	41.54	30.5	0	1.16	236.76	0.2	994.34	0.6	0.4	7.68	29.82	0	0.051
2023-04-22 21:00:00	10.86	43.5	29.28	0	1.72	261.32	0.2	994.84	0.6	0.4	7.62	28.44	0	0.07
2023-04-22 22:00:00	10.86	48.74	28.08	0	0.64	224.7	0	995.18	0.6	0.4	7.56	26.52	0	0.02
2023-04-22 23:00:00	10.86	50.74	27.32	0	0.4	214.94	0.2	995.36	0.6	0.4	7.5	25.16	0	0.008
2023-04-23	10.86	47.86	27.5	0	1.02	225.4	0.2	995.24	0.6	0.4	7.46	25.66	0	0.036	5.24	7	81.3	23.3	36.2	23.6	0	994.935	451.05	268.95	7.715	32.145
2023-04-23 01:00:00	10.86	51.58	26.6	0	0.74	280.54	0.2	995.02	0.6	0.4	7.44	24.9	0	0.021
2023-04-23 02:00:00	10.86	56.72	25.5	0	0.6	209.56	0.2	994.88	0.6	0.4	7.4	23.74	0	0.013
2023-04-23 03:00:00	10.86	55.28	25.94	0	0.78	229.36	0	994.78	0.6	0.4	7.38	23.86	0	0.02
2023-04-23 04:00:00	10.86	65.08	24.2	0	0.5	223.86	0.2	995.2	0.6	0.4	7.36	22.52	0	0.005
2023-04-23 05:00:00	10.86	67.3	23.8	0	0.46	102.1	0.2	995.62	0.6	0.4	7.32	22.22	0	0.003
2023-04-23 06:00:00	10.86	69.38	23.68	7.4	0.32	150.26	16.8	995.96	13.6	13.2	7.32	22.12	0	0.001
2023-04-23 07:00:00	10.86	65.68	25.16	128.2	0.46	242.28	265.6	996.6	248.8	208	7.34	25.66	0	0.051
2023-04-23 08:00:00	10.86	59.34	27.38	293.8	1.56	263.48	602.4	997.28	585.2	400.4	7.44	31.62	0	0.216
2023-04-23 09:00:00	10.84	54.84	28.8	503.4	1.92	248.42	1031.8	997.76	993.8	617.4	7.54	34.8	0	0.39
2023-04-23 10:00:00	10.84	48.08	31.04	768.8	2.02	272.94	1553.2	998.04	1530.2	737.4	7.7	39.42	0	0.616
2023-04-23 11:00:00	10.84	38.08	33.04	856.2	1.9	265.62	1721.8	997.68	1731.2	698.2	7.88	42.6	0	0.712
2023-04-23 12:00:00	10.84	32.26	34.64	935	1.5	223.7	1856.6	997.16	1796.4	659.2	8.04	45.24	0	0.782
2023-04-23 13:00:00	10.84	26.06	35.8	908	1.48	167.66	1812	996.42	1772.2	658.8	8.14	47.04	0	0.781
2023-04-23 14:00:00	10.82	25.3	36.3	823.6	1.68	190.3	1683.4	995.22	1624.4	628.4	8.18	47.38	0	0.736
2023-04-23 15:00:00	10.82	24.36	36.28	550	1.82	166.28	1150	994.14	1080.4	528.2	8.18	46.6	0	0.553
2023-04-23 16:00:00	10.84	25.08	35	265.4	1.92	191.78	576.4	993.7	519	397.4	8.02	40.58	0	0.358
2023-04-23 17:00:00	10.84	29.68	33.9	241.6	1.9	195.5	464.6	994.14	406.4	325.8	7.88	37.9	0	0.311
2023-04-23 18:00:00	10.84	31.48	32.02	79.6	2.72	158.52	164.8	994.74	140.6	131.4	7.78	34.26	0	0.248
2023-04-23 19:00:00	10.84	30.32	31.42	1.4	3.3	94.4	3.2	996.12	2.4	1.8	7.68	31.52	0	0.24
2023-04-23 20:00:00	10.84	33.1	30.22	0	3.38	207.74	0	997.48	0.6	0.4	7.6	30.44	0	0.148
2023-04-23 21:00:00	10.86	39.22	28.02	0	2.76	166.2	0.2	998.48	0.6	0.4	7.52	28.38	0	0.11
2023-04-23 22:00:00	10.86	40.94	27.54	0	2.52	312.18	0.2	999.02	0.6	0.4	7.46	27.66	0	0.1
2023-04-23 23:00:00	10.86	44.48	26.84	0	1.86	251.06	0.2	999.78	0.6	0.4	7.42	27	0	0.074
2023-04-24	10.86	46.9	26.5	0	2.16	317.28	0	1000.06	0.6	0.4	7.38	26.46	0	0.078	6.57	7	74.3	21.6	36.9	22.7	0	996.47	518.8	250.4	7.64	32.665
2023-04-24 01:00:00	10.86	51.04	26.12	0	1.4	180.32	0.2	1000.22	0.6	0.4	7.34	25.6	0	0.051
2023-04-24 02:00:00	10.86	65.1	24.48	0	0.96	160.48	0.2	999.84	0.6	0.4	7.3	22.96	0.4	0.024
2023-04-24 03:00:00	10.86	66.36	23.96	0.2	1.54	91.84	0.2	998.88	0.6	0.4	7.24	22.44	0	0.034
2023-04-24 04:00:00	10.86	68.64	23.84	0	1.08	169.08	0.2	999.38	0.6	0.4	7.18	22.08	0	0.023
2023-04-24 05:00:00	10.86	65.52	23.88	0	0.86	115.42	0.2	1000.28	0.6	0.4	7.16	21.42	0	0.02
2023-04-24 06:00:00	10.86	63.1	24.06	8.8	2.06	135.1	20.2	1001.44	17.6	17.2	7.14	22.06	0	0.05
2023-04-24 07:00:00	10.86	73.32	23.8	108	3.36	145.58	222.8	1001.24	213.4	175	7.16	24.18	0	0.094
2023-04-24 08:00:00	10.86	74.02	24.6	300	3.52	149.18	599.8	1001.98	592.8	363	7.22	27.96	0	0.216
2023-04-24 09:00:00	10.86	67.62	26.24	499.2	2.42	156.48	1003.4	1002.76	1003.4	544.2	7.32	32.32	0	0.357
2023-04-24 10:00:00	10.84	60.36	27.8	627	1.9	138.22	1255	1003.32	1254.4	669	7.48	36.02	0	0.471
2023-04-24 11:00:00	10.84	55.58	28.98	676.6	1.72	200	1350.4	1003.36	1331	911.8	7.62	38.16	0	0.529
2023-04-24 12:00:00	10.84	47.26	30.44	628.6	1.6	192.64	1263.4	1002.92	1206.8	975.2	7.74	40.22	0	0.525
2023-04-24 13:00:00	10.84	43.42	31.34	820	2.24	138.62	1596.8	1002.34	1561.2	850	7.8	41.04	0	0.685
2023-04-24 14:00:00	10.84	41.34	32.24	671	2.38	135.4	1356	1001.42	1313	740.6	7.86	42.2	0	0.605
2023-04-24 15:00:00	10.84	40.6	32.54	549.6	2.88	132.3	1129	1000.48	1079.4	681	7.86	41.54	0	0.544
2023-04-24 16:00:00	10.84	39.9	32.46	432.2	2.82	129.74	872.2	999.22	805.4	525.6	7.84	39.68	0	0.46
2023-04-24 17:00:00	10.84	42.22	31.9	251.4	3.94	110.72	515	998.22	458	323.4	7.78	36.9	0	0.377
2023-04-24 18:00:00	10.84	43.66	30.92	42.2	3.72	106.26	106.8	998.88	93	91.8	7.68	32.3	0	0.24
2023-04-24 19:00:00	10.84	45.4	30.24	3.4	3.1	105.46	8.2	999.8	6.8	6.4	7.58	30.1	0	0.176
2023-04-24 20:00:00	10.86	47.28	29.58	0	3.02	131.82	0.2	1001.08	0.6	0.4	7.5	29.4	0	0.098
2023-04-24 21:00:00	10.86	91.26	21.46	0	5.38	47.14	0	1003	0.6	0.4	7.42	24.26	0	0.013
2023-04-24 22:00:00	10.86	98.74	20.96	0	3.24	193.42	0	1004.18	0.6	0.4	7.32	22.92	0	-0.005
2023-04-24 23:00:00	10.86	99.66	20.94	0	1.46	158.38	0	1005.3	0.6	0.6	7.28	21.5	1.6	-0.009
2023-04-25	10.86	99.98	21.18	0	1.96	69.08	0	1003.62	0.6	0.6	7.22	21.28	0.2	-0.008	5.57	9	100	39.2	32.7	20.2	2.2	1001.38	455.95	286.6	7.46	29.94
2023-04-25 01:00:00	10.86	96.92	21.92	0	2.08	170.94	0	1002.2	0.6	0.4	7.18	21.72	0	-0.004
2023-04-25 02:00:00	10.86	96.84	21.64	0	2.44	171.44	0	1001.48	0.6	0.4	7.16	21.42	0	-0.003
2023-04-25 03:00:00	10.86	97.8	21.56	0	2.08	135	0	1002.5	0.6	0.4	7.12	20.78	0	-0.005
2023-04-25 04:00:00	10.86	99.98	21.3	0	1.76	157.6	0	1002.64	0.6	0.4	7.1	20.52	0	-0.008
2023-04-25 05:00:00	10.86	99.98	21.28	0	0.78	190.54	0	1002.5	0.6	0.6	7.08	20.24	0	-0.01
2023-04-25 06:00:00	10.86	100	21	13.6	0.4	162.16	28.2	1002.9	24.6	24.6	7.08	20.02	0	-0.007
2023-04-25 07:00:00	10.86	99.18	22.12	128.4	0.76	55.52	259.6	1003.7	254.2	191.2	7.1	23.24	0	0.045
2023-04-25 08:00:00	10.86	97.14	23.34	332.6	1.64	45.92	653	1003.96	657.8	373.8	7.18	27.32	0	0.184
2023-04-25 09:00:00	10.86	73.48	25.54	526.6	1.22	120.82	1048	1004.32	1066.2	537.4	7.3	31.68	0	0.353
2023-04-25 10:00:00	10.86	61.52	27.32	700.2	2.18	108.64	1397.2	1004.36	1420.8	634.8	7.44	34.58	0	0.511
2023-04-25 11:00:00	10.84	53.96	28.58	874.2	2.24	98.66	1718.2	1004.02	1746	723	7.6	37.5	0	0.659
2023-04-25 12:00:00	10.84	53	29.74	920.8	2.52	93.62	1792.4	1003.4	1791.4	680.8	7.74	39.28	0	0.716
2023-04-25 13:00:00	10.84	51.12	30.54	709.2	2.16	63.54	1395.2	1002.66	1381.2	757	7.84	40	0	0.589
2023-04-25 14:00:00	10.84	50.32	30.98	504.6	1.56	92.46	1007.6	1001.82	967.6	761.6	7.86	38.78	0	0.442
2023-04-25 15:00:00	10.84	47.82	31.44	539	1.44	78.44	1080	1000.44	1030	733.6	7.86	38.56	0	0.461
2023-04-25 16:00:00	10.84	45.78	31.72	367.2	1.68	77.68	754	999.36	702.4	494	7.84	37.74	0	0.353
2023-04-25 17:00:00	10.84	44.82	31.96	289.6	1.78	86.32	577	998.58	519.2	332	7.84	37.32	0	0.295
2023-04-25 18:00:00	10.84	46.88	31.42	87.4	2.02	74.74	190	997.88	160.2	138	7.78	33.56	0	0.172
2023-04-25 19:00:00	10.84	53.18	29.66	5.2	0.38	134.12	11.6	998.56	9.6	9	7.68	28.4	0	0.029
2023-04-25 20:00:00	10.86	67.4	26.5	0	0	116.1	0.2	999.26	0.6	0.4	7.6	25.5	0	-0.012
2023-04-25 21:00:00	10.86	73.88	25.34	0	0	133.24	0.2	999.9	0.6	0.4	7.54	24.38	0	-0.011
2023-04-25 22:00:00	10.86	81.2	24.72	0	0.04	171.22	0.2	1000.54	0.6	0.4	7.5	23.62	0	-0.01
2023-04-25 23:00:00	10.86	85.24	24.6	0	0.1	135.26	0.2	1000.5	0.6	0.4	7.46	23.18	0	-0.008
2023-04-26	10.86	90.7	24.12	0	0.16	191.74	0.2	1000.08	0.6	0.4	7.44	22.84	0	-0.008	4.72	9	100	44.1	32.1	20.7	0	1001.57	489.05	266.45	7.475	28.84
2023-04-26 01:00:00	10.86	99.36	23.64	0	0	161.56	0	999.66	0.6	0.4	7.42	22.62	0	-0.009
2023-04-26 02:00:00	10.86	99.98	23.36	0	0	117.26	0.2	999.4	0.6	0.4	7.42	22.38	0	-0.009
2023-04-26 03:00:00	10.86	100	23.12	0	0	134.6	0	999.2	0.6	0.4	7.4	22.64	0	-0.009
2023-04-26 04:00:00	10.86	99.98	23.18	0	0.1	123.18	0	999.06	0.6	0.4	7.4	22.34	0	-0.009
2023-04-26 05:00:00	10.86	99.78	23.34	0	0.34	99.08	0.2	999.4	0.6	0.4	7.38	22	0	-0.008
2023-04-26 06:00:00	10.86	96.96	23.16	9.8	0.06	178.96	20.6	1000.04	17.6	17.2	7.38	21.88	0	-0.005
2023-04-26 07:00:00	10.86	96.54	24.04	102.2	0.12	153.28	205.8	1000.88	190.8	181.6	7.4	24.6	0	0.032
2023-04-26 08:00:00	10.86	68.56	27.18	264.4	0.88	51.5	536.4	1001.26	517.8	427.4	7.48	30.18	0	0.175
2023-04-26 09:00:00	10.84	55.28	29.48	515.8	1.56	83.52	1032.4	1001.62	1024.4	645.4	7.6	34.84	0	0.395
2023-04-26 10:00:00	10.84	45.56	31.22	656.4	1.9	103.84	1319.8	1001.56	1317.8	743.8	7.74	38.42	0	0.541
2023-04-26 11:00:00	10.84	41.3	32.06	865.2	1.86	94.06	1707.2	1001.28	1707	839	7.88	41.06	0	0.703
2023-04-26 12:00:00	10.84	41.12	32.96	898.8	1.52	146.92	1751.8	1000.78	1733	768.2	8.02	43	0	0.733
2023-04-26 13:00:00	10.84	41.22	33.7	878.4	1.48	206.56	1715.2	999.92	1694.2	818.6	8.14	44.24	0	0.729
2023-04-26 14:00:00	10.84	39.24	34.26	798.2	1.52	148.28	1594	998.88	1542.2	836.4	8.18	44.98	0	0.68
2023-04-26 15:00:00	10.82	38.64	34.5	650.4	1.58	87.1	1318.4	997.9	1268.6	757.8	8.2	44.52	0	0.575
2023-04-26 16:00:00	10.84	37.74	34.84	447.4	1.26	89.62	905.4	997.08	840.4	567.6	8.16	43.2	0	0.412
2023-04-26 17:00:00	10.84	37.3	34.9	264.8	1.28	81.9	529.6	996.38	473.8	362.6	8.08	40.52	0	0.277
2023-04-26 18:00:00	10.84	39.04	34.18	81	1.06	52.48	174.4	996.1	147.6	137.2	7.98	36.24	0	0.134
2023-04-26 19:00:00	10.84	42.48	32.62	3.2	0.88	51.78	8.2	996.36	6.6	6.2	7.86	31.44	0	0.067
2023-04-26 20:00:00	10.84	53.98	29.88	0	0.06	149.82	0	996.86	0.6	0.4	7.76	28.14	0	-0.015
2023-04-26 21:00:00	10.86	64.2	27.94	0	0	175.92	0.2	997.64	0.6	0.4	7.68	26.62	0	-0.017
2023-04-26 22:00:00	10.86	66.38	27.62	0	0.04	163.78	0.2	997.82	0.6	0.4	7.64	25.98	0	-0.015
2023-04-26 23:00:00	10.86	67.56	27.4	0	0.18	138.34	0	998.12	0.6	0.4	7.6	26.06	0	-0.009
2023-04-27	10.86	63.8	28.32	0	1.58	271.12	0.2	998.64	0.6	0.4	7.58	27.34	0	0.035	5.38	9	100	36.6	35	22.6	0	998.995	520.3	296.4	7.72	31.885
2023-04-27 01:00:00	10.86	56.26	28.34	0	1.6	298.02	0	998.82	0.6	0.4	7.56	27.58	0	0.044
2023-04-27 02:00:00	10.86	56.94	27.74	0	0.8	280.38	0	998.7	0.6	0.4	7.54	26.94	0	0.016
2023-04-27 03:00:00	10.86	56.7	27.6	0	1.06	312.16	0	998.68	0.6	0.4	7.52	26.78	0	0.026
2023-04-27 04:00:00	10.86	56.06	27.32	0	1.78	285.88	0.2	998.84	0.6	0.4	7.5	26.52	0	0.047
2023-04-27 05:00:00	10.86	57.14	26.92	0	0.88	229.94	0.2	998.5	0.6	0.4	7.46	26.04	0	0.019
2023-04-27 06:00:00	10.86	64.34	25.84	6.4	0.54	140.56	13	999.22	10.4	10	7.44	25.28	0	-0.01
2023-04-27 07:00:00	10.86	70.44	25.52	59.6	0.28	171.94	121.4	999.88	108.4	107.2	7.44	25.94	0	0.008
2023-04-27 08:00:00	10.86	65.98	26.58	74.6	0.46	189.86	157	1001.44	140.6	137.8	7.46	27.2	0	0.072
2023-04-27 09:00:00	10.86	63.38	27.12	266.6	1.04	217.42	554.4	1002.22	526.6	423	7.5	29.56	0	0.214
2023-04-27 10:00:00	10.84	56.62	28.46	517.4	1.28	178.24	1080.6	1002.1	1051.8	631.6	7.58	33.96	0	0.402
2023-04-27 11:00:00	10.84	49.64	30.22	705.4	1.3	221.66	1441.6	1001.66	1413.2	912.4	7.74	39.32	0	0.555
2023-04-27 12:00:00	10.84	45.02	31.48	702	1.6	255.96	1436.2	1000.98	1370.6	929.6	7.86	40.36	0	0.585
2023-04-27 13:00:00	10.84	41.52	32.64	830.2	1.66	188.2	1695.4	1000.26	1662.4	758.6	7.94	42.32	0	0.691
2023-04-27 14:00:00	10.84	39.62	33.62	612.6	1.18	217.2	1273.8	999.06	1219.2	852	8.02	43.28	0	0.531
2023-04-27 15:00:00	10.84	37.58	34.5	592	1.06	184.64	1236.2	998.16	1184.6	808.6	8.02	43.6	0	0.511
2023-04-27 16:00:00	10.84	35.2	34.82	432.8	1.28	218.8	910.4	997.42	843	568.8	8	42.16	0	0.406
2023-04-27 17:00:00	10.84	31.82	34.96	275.8	1.9	309.58	589.8	996.86	520.4	328.6	7.94	39.94	0	0.331
2023-04-27 18:00:00	10.84	32.24	34.4	95.4	1.38	235.3	226.2	996.58	184.6	139.2	7.84	36.56	0	0.172
2023-04-27 19:00:00	10.84	39.94	32	5.8	0.46	199.2	14.4	996.66	11.6	11.2	7.72	30.52	0	0.042
2023-04-27 20:00:00	10.86	51.54	28.7	0	0	57.94	0.2	997.34	0.6	0.4	7.62	27.24	0	-0.019
2023-04-27 21:00:00	10.86	59.96	27.02	0	0.12	81.3	0	998.24	0.6	0.4	7.54	25.66	0	-0.012
2023-04-27 22:00:00	10.86	65.32	26.7	0	0	103.04	0.2	999.26	0.6	0.4	7.46	24.98	0	-0.016
2023-04-27 23:00:00	10.86	67.7	26.44	0	0.16	158.38	0	999.82	0.6	0.4	7.42	24.5	0	-0.01
2023-04-28	10.86	70.32	25.84	0	0.04	121.96	0.2	999.64	0.6	0.4	7.38	23.92	0	-0.014	4.59	8	73.7	30.8	35.1	25.1	0	999.18	427.25	275.95	7.645	31.675
2023-04-28 01:00:00	10.86	69.8	26.04	0	0.12	136.02	0.2	999.6	0.6	0.4	7.34	23.58	0	-0.011
2023-04-28 02:00:00	10.86	74.02	24.98	0	0	136.72	0.2	999.48	0.6	0.4	7.3	22.98	0	-0.015
2023-04-28 03:00:00	10.86	74.56	25.16	0	0.14	128.26	0.2	999.08	0.6	0.4	7.28	22.76	0	-0.011
2023-04-28 04:00:00	10.86	81.62	24.02	0	0	106.7	0	998.72	0.6	0.4	7.26	22.34	0	-0.014
2023-04-28 05:00:00	10.86	78.44	24.88	0	0.6	271.32	0.2	999.14	0.6	0.4	7.24	22.84	0	-0.001
2023-04-28 06:00:00	10.86	79.58	24.78	17.2	0.22	208.46	32.6	999.74	27.6	27.2	7.24	23.4	0	-0.017
2023-04-28 07:00:00	10.86	74.02	25.72	101.2	0.58	242.32	210.2	1000.16	192.4	173	7.26	25.72	0	0.038
2023-04-28 08:00:00	10.86	58.72	28.24	341.4	1.74	270.48	697.4	1000.82	684.4	414.8	7.34	31.58	0	0.261
2023-04-28 09:00:00	10.84	50.48	30.98	574.4	2.14	286.32	1188.6	1001.26	1194	537.4	7.48	36.66	0	0.473
2023-04-28 10:00:00	10.84	43.92	32.82	746.2	2.66	318.8	1539.2	1001.38	1554.6	555.4	7.64	39.64	0	0.645
2023-04-28 11:00:00	10.84	38.56	34.02	889.2	2.68	263.68	1796.4	1000.7	1795	637.8	7.78	41.96	0	0.777
2023-04-28 12:00:00	10.84	37.2	34.92	752.8	2.1	223.86	1519	999.94	1471.6	735.4	7.92	43.68	0	0.684
2023-04-28 13:00:00	10.84	35.52	35.76	941.4	2.1	275.42	1882.8	999.34	1857.6	788.4	8	45.16	0	0.826
2023-04-28 14:00:00	10.84	32.52	36.48	744.4	2.18	239.68	1544.8	998.4	1486.2	760.6	8.06	45.9	0	0.704
2023-04-28 15:00:00	10.82	30.74	36.84	638.8	2.12	264.96	1349.8	997.36	1302.8	697.2	8.04	44.9	0	0.627
2023-04-28 16:00:00	10.82	29.52	37.2	482.8	2.26	219.38	1021.8	996.28	950.4	462.6	8	44.02	0	0.522
2023-04-28 17:00:00	10.84	29.82	36.58	237.4	2.08	265.74	504.4	995.58	446.4	313.2	7.9	40.4	0	0.334
2023-04-28 18:00:00	10.84	30.38	35.72	67.8	1.92	105.8	151.8	995.66	131.4	109.8	7.78	36.5	0	0.208
2023-04-28 19:00:00	10.84	32.02	34.4	5	0.78	210	10.8	995.92	8.6	8.4	7.66	32.26	0	0.075
2023-04-28 20:00:00	10.84	37.54	32.92	0	0.76	302.52	0	996.9	0.6	0.4	7.56	30.32	0	0.027
2023-04-28 21:00:00	10.86	41.84	32.04	0	1.22	286.08	0.2	997.84	0.6	0.4	7.5	30.24	0	0.049
2023-04-28 22:00:00	10.86	39.4	31.22	0	1.72	259.62	0	998.84	0.6	0.4	7.44	29.76	0	0.072
2023-04-28 23:00:00	10.86	39.74	30.2	0	0.84	215.3	0.2	999.08	0.6	0.4	7.38	28.24	0	0.028
2023-04-29	10.86	42.82	29.38	0	0.98	237.46	0.2	999	0.6	0.4	7.34	27.54	0	0.033	6.31	10	84.4	28.5	37.4	23.8	0	998.76	546.2	259.4	7.575	33.015
2023-04-29 01:00:00	10.86	47.92	28.26	0	0.82	284.16	0	998.86	0.6	0.4	7.3	26.82	0	0.021
2023-04-29 02:00:00	10.86	50.32	28	0	0.68	285.28	0.2	998.8	0.6	0.4	7.28	26.46	0	0.013
2023-04-29 03:00:00	10.86	54.7	27.44	0	0.72	241.62	0.2	998.64	0.6	0.4	7.24	26.1	0	0.012
2023-04-29 04:00:00	10.86	57.2	26.92	0	0.68	296.94	0	998.26	0.6	0.4	7.22	25.44	0	0.009
2023-04-29 05:00:00	10.86	58.38	26.84	0	1.32	311.68	0	998.8	0.6	0.4	7.22	25.94	0	0.03
2023-04-29 06:00:00	10.86	60.4	26.66	9.2	1.24	297.34	19.4	999.4	15.8	15.4	7.2	25.82	0	0.021
2023-04-29 07:00:00	10.86	60.24	26.96	125.6	1.32	288.44	257.6	1000.1	237.8	212.2	7.2	27.44	0	0.086
2023-04-29 08:00:00	10.86	57.58	27.92	207.6	1.58	313.98	435.2	1000.76	403.6	380	7.26	30.2	0	0.182
2023-04-29 09:00:00	10.86	55.22	28.88	368.4	2.16	283.52	772.8	1001.12	732.4	648.6	7.32	32.84	0	0.323
2023-04-29 10:00:00	10.84	51.62	29.96	580.6	2.2	283.28	1210	1001.32	1177.4	787.2	7.42	35.8	0	0.483
2023-04-29 11:00:00	10.84	47.04	31.14	593.2	2.2	244.18	1235.2	1001.1	1187.6	873	7.54	38.48	0	0.522
2023-04-29 12:00:00	10.84	42.26	32.2	893.2	2.16	320.44	1811	1000.38	1758	820.6	7.66	40.94	0	0.741
2023-04-29 13:00:00	10.84	39.14	33.1	728.6	1.76	275.88	1493	999.72	1451.2	780.2	7.76	42.58	0	0.634
2023-04-29 14:00:00	10.84	37.74	33.92	758.6	1.74	253.6	1565.6	998.74	1516.2	725.2	7.84	44.08	0	0.66
2023-04-29 15:00:00	10.84	37.14	34.16	639.6	1.72	213.34	1343.4	997.94	1282	701.4	7.82	42.38	0	0.573
2023-04-29 16:00:00	10.84	34.56	34.78	503	1.7	114.62	1083.4	996.78	1004	413.2	7.82	43.18	0	0.476
2023-04-29 17:00:00	10.84	34.08	34.8	310.4	1.36	129.82	658.8	995.9	580.8	313	7.76	41.26	0	0.313
2023-04-29 18:00:00	10.84	35.16	34.08	79	1.18	240.14	183.2	995.82	152.8	119.4	7.66	36.18	0	0.147
2023-04-29 19:00:00	10.84	40.62	32.44	7.2	0.44	239.46	14.8	996.22	12.2	11.8	7.52	31.4	0	0.042
2023-04-29 20:00:00	10.86	49.94	29.78	0	0	129.2	0.2	996.76	0.6	0.4	7.42	29.08	0	-0.024
2023-04-29 21:00:00	10.86	54.16	29.18	0	0.06	145.82	0.2	997.58	0.6	0.4	7.34	28.58	0	-0.019
2023-04-29 22:00:00	10.86	57.7	29	0	0.16	112.12	0	998.18	0.6	0.4	7.3	28.24	0	-0.014
2023-04-29 23:00:00	10.86	60.98	28.32	0	0.06	129.32	0	998.36	0.6	0.4	7.26	27.64	0	-0.018
2023-04-30	10.86	63.84	27.72	0	0	163.28	0.2	998.02	0.6	0.4	7.22	27.12	0	-0.021	5.19	8	66.3	33.3	35.1	26.6	0	998.65	479.9	283.55	7.44	32.665
2023-04-30 01:00:00	10.86	59	28.88	0	1.04	307.96	0.2	997.92	0.6	0.4	7.2	27.72	0	0.022
2023-04-30 02:00:00	10.86	57.1	29	0	1.6	324.82	0	997.9	0.6	0.4	7.18	28.1	0	0.041
2023-04-30 03:00:00	10.86	59.54	28.26	0	1.12	269.92	0.2	997.52	0.6	0.4	7.16	27.14	0	0.023
2023-04-30 04:00:00	10.86	61.8	27.58	0	1	295.32	0.2	997	0.6	0.4	7.14	26.36	0	0.017
2023-04-30 05:00:00	10.86	62.64	27.24	0	1.24	287.32	0	997.3	0.6	0.4	7.12	26.54	0	0.023
2023-04-30 06:00:00	10.86	62.7	26.84	8.8	1.32	226.54	18.2	997.76	14.8	14.4	7.1	26.38	0	0.022
2023-04-30 07:00:00	10.86	64.08	26.66	59.8	0.72	285.74	123.8	998.42	108.8	107.8	7.1	26.74	0	0.031
2023-04-30 08:00:00	10.86	63.66	26.98	142.6	0.98	278.24	300	999.3	270.2	267.8	7.12	28.24	0	0.123
2023-04-30 09:00:00	10.86	59.48	27.9	272	1.44	301.02	576.6	999.94	528	523.8	7.18	30.88	0	0.236
2023-04-30 10:00:00	10.84	54.9	29.14	454.4	2.32	315.38	964.6	1000.56	907.2	833	7.26	34.18	0	0.397
2023-04-30 11:00:00	10.84	53.04	29.68	476.4	2.6	311.56	1011.2	1000.34	941.2	902.2	7.36	35.44	0	0.435
2023-04-30 12:00:00	10.84	57.02	29.2	317	2.5	177.56	677.6	1000.16	618.8	614.6	7.38	33.66	0	0.324
2023-04-30 13:00:00	10.84	62.54	28.5	262.6	2.5	134.48	573.8	1000.18	519.4	515.6	7.36	32.44	0	0.274
2023-04-30 14:00:00	10.86	65.46	28.04	166.6	2.36	68.5	368	999.62	330.4	324.4	7.34	30.98	0	0.199
2023-04-30 15:00:00	10.86	66.88	27.4	210	2.54	76.64	454.2	999.04	407.2	401.2	7.3	30.48	0	0.224
2023-04-30 16:00:00	10.86	67.6	26.74	247.2	2.94	62.16	531.6	998.32	478	473.6	7.3	30.58	0	0.244
2023-04-30 17:00:00	10.86	68.6	25.7	127.2	2.64	65.4	272.8	997.72	243.4	241.2	7.28	28.78	0	0.159
2023-04-30 18:00:00	10.86	70.6	25.04	50.8	2.34	63.28	107.4	997.86	93.4	92.4	7.22	26.92	0	0.101
2023-04-30 19:00:00	10.86	70.26	24.6	2.4	1.64	56.3	5.4	998.56	4	3.6	7.16	25.58	0	0.052
2023-04-30 20:00:00	10.86	70.12	24.64	0	1.16	135.08	0	998.76	0.6	0.4	7.12	25.14	0	0.025
2023-04-30 21:00:00	10.86	70.32	24.76	0	0.78	215.88	0	998.92	0.6	0.4	7.1	24.88	0	0.017
2023-04-30 22:00:00	10.86	86.66	23.34	0	1.34	86.08	0	999.56	0.6	0.4	7.06	23.9	0	0.011
2023-04-30 23:00:00	10.86	95.34	22.9	0	0.46	121.92	0.2	999.6	0.6	0.4	7.04	23.06	0	-0.001
2023-05-01	10.86	86.74	23.38	0	0.86	85.5	0.2	999.38	0.6	0.4	7.02	23.54	0	0.006	3.01	0	99.9	52.6	29.8	22.7	0	998.82	227.95	221.65	7.19	28.235
